# Supplementary material
Source: ML conference proceedings conference paper supplement (https://aclanthology.org/2024.lrec-main.1112)
Supplement: OptionalSupplementaryMaterial [file 2024.lrec-main.1112.OptionalSupplementaryMaterial.xlsx]

## Sheet: Foglio1
id	text	word	pejorative	misogyny
10001	"Che nome c'ha questo piatto?" \n"La mia Pathong" \n"E com'è la tua PathonK?"\n"Colorata, speziata... Acida. Come me"	acida	0	0
10002	Io proprio non vorrei fare sempre la parte di quella acida e lo so che tutti i miei tweet sono polemici, però NO. GOD. NO. https://t.co/K5PxxrtQ3I	acida	1	0
10003	@Rossie9Isabella Patate con carne:\n Patate - 1 kg\n Uovo - 2-3 pezzi.\n Farina - 4-5 cucchiai. l.\n Carne (maiale, manzo, ecc.) - 500 g\n Cipolle - 1-2 pezzi.\n Sale - a piacere\n Pepe - a piacere\n Olio vegetale per friggere\n Panna acida (per servire) - a piacere	acida	0	0
10004	@ConfortiTiziana Sembri la sorella gemella di Renato Brunetta. Uguali!! Ora capisco perché sei così acida. La vita con te è stata ingiusta. Ma non te la puoi prendere con gli altri però. Lavora su te stessa e magari in futuro riuscirai ad approcciarti al prossimo senza cattiveria. https://t.co/VGVIBp4GeE	acida	1	1
10005	@solojuventuss @5e323d2f9d32427 Acida la nonnina...niente lasagna e niente...ma si chiudiamola qui😂😂	acida	1	1
10006	@f_rodognino A me no. Semplicemente allora è fuori luogo il tuo primo tweet. Comunque meno acida ❤️	acida	1	1
10007	@Ponkia3 Ripeto, passa oltre. Grazie. Vai a a sfogare la tua repressione altrove. A me fa ridere e trovo che rappresenti la realta quindi me ne frego se è un Photoshop. Ti disturba la cosa? È il mio profilo e faccio come mi pare. Vai, passa oltre. Sciò sciò, pussa via acida!	acida	1	0
10008	@musicaddicted__ @juventusfc Di nulla.\nDel resto, tu sei juventina acida, io incazzato e rancoroso, siamo ben assortiti.\n😁 😁	acida	1	1
10009	@NoahM21366026 @granatiere1906 @Antone2lo_ @Gabgar71 @ZZiliani Troppo acida. Conduci sicuramente una brutta vita se vuoi conosco qualcuno del tuo paese che potrebbe aiutarti.	acida	1	1
10010	@smirkdrew Xchè avrà dato una risposta acida a lui	acida	0	0
10011	@FabrizioDamian2 @pestapere In seconda battuta occorrerà un'altra conferenza a Riad,come pure in Cassazione. \nIl giudice fiorentino ha fatto buon governo della legge,precisando che la satira anche acida è lecita nei confronti dei politici.\nSpiace per voi renziani ma vi dovete abituare alle sconfitte legali.	acida	0	0
10012	@CarloMossa Vorrei tornare a prima del 2 Gennaio...Milord...ero meno...acida...ora mi pare di esser diventa come...il gretto..che osò...farmi la morale per dei twitt..	acida	1	0
10013	@_sommario_ probabilmente se le è sognate oppure considera come “litigata” quando ogni tanto tira una risposta acida 💀	acida	0	0
10014	@stanzaselvaggia C'avrei scommesso che la leccaculo di Travaglio e acida donnetta avrebbe scritto simile boiata\nVede oca selvaggia, c'è un modo intelligente per fare satira ed uno da bimbomichia\nComunque mi fa piacere che il giudice abbia sollevato Travaglio dal pagare l'ennesima calunnia -&gt;	acida	1	1
10015	@Sacri71 @silupescu Macchè, barbabietole e panna acida per fare la zuppa.	acida	0	0
10016	@silupescu Che acida e antipatica quella coi capelli in tinta con la giacca che mostra la magliettina viola.	acida	1	1
10017	@cindygooo Una grande sorella e' particolarmente acida con Oriana persino nel tono.vergognosi	acida	1	0
10018	Non ho capito il disprezzo di questa donna per la cognata che si è seduta a tavola per la prima volta in vita sua con la sua famiglia...una vecchia zitellona acida 😠😠😠😠\n#YaliÇapkini https://t.co/b9scfrpzgX	acida	1	1
10019	@ricckardsummer Infatti è inesistente ogni tanto apre bocca per dire delle cattiverie è acida come quel speudo moroso	acida	1	1
10020	@worldernest @alwaysmyself87 Sarebbe un’idea, almeno sarebbe meno acida 🤣🤣🤣	acida	1	1
10021	@pisto_gol Per cui …….Che vita acida che devi avere .\nÈ una bellissima giornata fatti una passeggiata invece di pensare sempre alla tua ossessione .	acida	0	0
10022	Troppo idiota non la sopporto più.\nMa d'altronde la capisco una vecchia acida zitella che si crede ancora appetibile e nessuno la calcola. https://t.co/CkEi66tMB4	acida	1	1
10023	Obiettivo: trovare un posto a Modena che venda birra acida	acida	0	0
10024	@ARSlav4 @Ingestibile79 @gildacana Si nasconde dietro la foto di un quadro perché è una grassona orribile! Acida e frustrata e venduta ai russi	acida	1	1
10025	#BuongiornoATutti da @CasaLettori con il\n\n"Papanasi"\n\nOriginario della Romania \n\ndolce fritto farcito con formaggio fresco e panna leggermente acida.\nServito con un una bella colata di marmellata ai mirtilli e una spolverata di zucchero a velo.\n\n#TripudioDiSapori a #CasaLettori https://t.co/vxNe4nsilx	acida	0	0
10026	@gommothceccogm1 È BRUTTA FUORI E DENTRO QUELLA ZITELLA ACIDA!!!	acida	1	1
10027	acida-muriatico: Vale di più un “mi manchi” detto dopo anni o un “ci sono sempre” ? ~ Mecna https://t.co/TQ0bBzTaDC	acida	0	0
10028	@itsxandree @sparklelemony Puoi citare quanto vuoi la frase di Gianmarco, per altro infondata, ma è innegabile come sia stata fuori luogo e con una intenzione non pienamente ironica, affermata da te "acida".\nSe poi vedo pure i like alle tue colleghe uno fa 2 + 2	acida	0	0
10029	@M25016096 Ci hanno dato addosso in una maniera rabbiosa e acida. Noi non dimentichiamo di certo. Ma sono convinto che la vita stessa gli darà una lezione.	acida	0	0
10030	@FioralbaI Ma questi è birra acida artigianale	acida	0	0
10031	@Vale41229116 Perché ti vogliono fuori tutti ,,sei una persona acida ,,lo vuoi capire o no..... Nn piaci a nessuno,,,,lunedì entrerà il tuo Gianluca e farete il siparietto alla Alex belli e moglie ...tutto calcolato a puntino ,,così farai ancora più schifo	acida	1	1
10032	@agggenzia Manca giusto la panna acida	acida	0	0
10033	#FoscaInnocenti #Fosca2 ma sarà stata la sorella di viani??? e che ha provato anche ad ucciderlo??? è sempre stata acida e abbastanza cattiva!!	acida	1	0
10034	odiando il fatto che qualcuno un giorno si è alzato e ha deciso di mimare con la bocca e smorfie acida dei prozac+ su tiktok con tanto di commenti di 15enni “pensavo di conoscerla solo io” no franca è più vecchia di te sta canzone 😪	acida	0	0
10035	@sole24ore . molti burini ignoranti tra i... "Kapo' on the net";\ntempo fà un mio commento sulla Dea Egizia (e poi \nRomana )Isis/Iside suscito' un' acida reazione da un \ntanghero che pensava che stessi parlando male del\nCaliffato,Daes etc e dei Musulmani in genere....\nergo......	acida	0	0
10036	@semplicementeec Dai non fare l’acida prendila così n modo migliore	acida	1	1
10037	|| un anno di questa piccola serpe acida 🤧 https://t.co/4O6jVqtDUm	acida	1	0
10038	@lucreziacampolo @suami_leone si lucrezia sei molto acida	acida	1	1
10039	@Iosonolagomma Ha 40 anni e sei la tipica stronzetta acida annoiata e un po’ rosicona.	acida	1	1
10040	@theblondes4 Infatti,si vede che è cattiva acida verso Antonella,poi con Edo.D lo consola ,lo abbraccia e gli parla con la voce da bambina!!Micol vomitevole🤮🤮🤮🤮	acida	1	0
10041	@Zohan_Zhoe Pesce con panna acida è da gourmet!!!	acida	0	0
10042	@sparklelemony Che la mia battuta fosse acida è più che vero ma è ironia, che possa piacere o meno, ma ho avuto la decenza di farlo su un argomento già discusso in casetta e che commentava le clip montate e mandate in onda. Non ho messo # nè nome perché non mi interessava colpire lei	acida	0	0
10043	@estancaa2 Ma io lo sapevo dall’inizio che fosse di “cattivo gusto” ma essendo che è una cosa detta e ridetta dai ragazzi stessi in casetta ci si può fare ironia, per quanto acida possa risultare. Sono altri commenti che sto leggendo che fanno schifo e fanno intendere altro, non il mio	acida	0	0
10044	@estancaa2 No potresti incazzarti per come la fanno passare e non per una battuta ironica (che fosse acida non lo nego assolutamente) che hai voluto intendere a modo tuo vedendoci più di quanto io avevo inteso	acida	0	0
10045	@RosyilCapo Ecco acida proprio no, ma leggermente speziata why not?	acida	0	0
10046	@sbrigabeghe Voleva fare quella acida e pungente, le hanno detto che ha toppato e non riesce ad accettarlo quindi peggiora le cose per via della sua arroganza.	acida	1	0
10047	@ChiaraColosimo ammazza che acida!!	acida	1	1
10048	La priorità fino ad oggi è stata quella di saltare da un letto e un uomo all'altro ma chi va con lo zoppo, zoppica (oriana);improvvisamente non essendoci riuscita nell'intento, si ricorda di avere dei figli. Si.Sono acida perché io le donne così le schifo e abbiamo la stessa età https://t.co/EOZQaU514s	acida	1	1
10049	@MasterChef_it @SkyItalia @NOWTV_It Meglio lui di quella acida di Sara!	acida	1	1
10050	@gommothceccogm1 Acida, la bruttezza non ha importanza ma l’ arroganza e l’ acidità sono insopportabili	acida	1	0
20001	@HoaraBorselli Certo che non capire un cazzo e’ un bel problema! Ci fai la giornalista? Neanche sai cosa sia l’anarchia! Che asina!	asina	1	1
20002	@aaquilas @marcobiondo @c_appendino Ma voi date seguito a questa asina? Nn ha nemmeno un nome nel profilo. Magari sarà un transgender che si spaccia per donna. Leonessa da tastiera	asina	1	1
20003	@Stefania_67 @marisarivelli91 Poverina sei troppo asina per capire che è fake	asina	1	1
20004	@lissiland Quello di @Marco_Slongo al latte d'asina.	asina	0	0
20005	Cerchi un modo naturale per nutrire e proteggere la tua pelle? Prova il Latte d'Asina Puro Regno Verde e scopri la bellezza naturale #LatteDAsinaPuro #BellezzaNaturale #RegnoVerde https://t.co/L6lQTOsSKN	asina	0	0
20006	@Lorellastelle A loré certo che non capisci una minchia.ASINA	asina	1	1
20007	@SandraM0027 @ChrisRicchiuti @FratellidItalia @GiorgiaMeloni Prenderò in considerazione il tuo gentile invito. Tu, invece, con quella faccia è inutile che ci provi: tempo sprecato come a lavare la testa all'asina.	asina	0	0
20008	E non solo! Ma non sai nemmeno cosa voglia dire antisemita ! Sei solo una #asina che raglia https://t.co/mkzNAHvfwL	asina	1	1
20009	@Ipertesa @CarloCalenda Ora 15.000 persone in più sanno che sei una asina, e sei pure contenta 🤣🤣🤣	asina	1	1
20010	@_soleilandia_ Neanche capace di parlare si dice tecnica asina alcolizzata che ci prova con tutti non rispetta le regole del gif e viene sempre ripresa dopo lavertimento di alfonso fuori il 🎪🎪🎪#denzzzers	asina	1	1
20011	@Ipertesa @CarloCalenda Cioè lui dà dell’asina a te ?! 😳 che curaggio	asina	1	0
20012	@giuseppelandi E qui casca l'asino, anzi l'asina: Meloni diglielo proprio alla romana....forza su, hai fatto un sacco de promesse e fino adesso non hai mantenuta neanche una, è la tua grande occasione, un bel E STI CAZZI! E la prossima volta non ce provano più. https://t.co/kgGElTHNqS	asina	1	0
20013	@GretaThunberg Mavaffanculo asina venduta. Senza offendere gli asini.	asina	1	1
20014	@unvermouth Mi fai venire in mente il libro dei Numeri nella Bibbia, dove l’asino viene mostrato come figura sapienziale, l’unico in grado di vedere i segni – prima ancóra dell’uomo – e riconoscere la volontà di Dio; proprio un’asina diventa la voce di Dio.\n\nAnimale intelligente e coraggioso	asina	0	0
20015	@Ipertesa La disonestà intellettuale è la tua perché se vincesse la Russia allora si che ci sarebbe una degenerazione della liberta’, dei diritti e della democrazia. Vai su internet e cerca “conferenza di Monaco” Anche se hai avuto tantissime visualizzazioni rimani un’asina	asina	1	1
20016	Ringrazio pubblicamente @CarloCalenda,senatore della Repubblica Italiana,per il suo retweet con commento dove mi dà dell'asina.\nGrazie a lui, per la prima volta nella storia ho fatto 15.000 visualizzazioni in un'ora 😂	asina	1	0
20017	@DSantanche Lei signora Garnero deve farsene una ragione: il botulino le ha distrutto l’unico neurone! I passaporti vengono usati per fare turismo all’estero!!!! Asina!!!! Cosa c’entra con migliorare il turismo in Italia???? Una vecchia senza arte né parte!!! Il governo dei coglioni	asina	1	1
20018	@BITCHYFit A lavare la testa all'asinA...\n@OriettaBerti @GiuliaSalemi93 @GrandeFratello \n=====\n@alfosignorini \n@SBruganelli	asina	0	0
20019	@GattoneTele @DSantanche @DSantanche è un asina.	asina	1	1
20020	@ardigiorgio Ancora con questi periodi ipotetici dell’irrealtá.\nChissà cosa avrebbero detto se avessero visto l’asina volare.	asina	0	0
20021	Come non Amare Pompei :) \nVilla di Poppea ( chi non ricorda l’aneddoto che ci raccontavano già alle elementari, del suo bagno nel latte di asina ) , mah !. https://t.co/qxiMMRUlim	asina	0	0
20022	@SCL13LIDIA @MarcoFattorini Pezzo di asina lo sanno tutti che la milizia ucronazi si nascondono nei palazzi residenziali . Merde umane loro e chi da loro supporto	asina	1	1
20023	@Simona_Cam Cùrati asina.	asina	1	1
20024	@Duazfan @marydramaa Intanto Oriana (è questo il suo nome, asina) ha detto a Luca che spera che torni con Ivana ma vabbè	asina	1	1
20025	@MariAn_due @GiancarloDeRisi Perché sei un'asina non informata , semplice.	asina	1	1
20026	Domani devo recuperare assolutamente le live di Jungkook e weverse deve sbrigarsi ad accettare i sottotitoli in italiano sono un asina con l' inglese	asina	1	0
20027	Sta asina è la prima che parla sopra la gente è mo piange. Ma vaffanculo va #controcorrente	asina	1	1
20028	La palomb asina sculacciata dalla @GiorgiaMeloni è una novità che farà notizia su tutti i giornali di domani \n\nHa fatto bene. \nE comunque L’asina è contenta di aver fatto lo sgubb proprio nella sua trasmissione #StaseraItalia\n#controcorrente	asina	1	1
20029	@repubbilca Il latte d' Asina , è quello che assomiglia di più al latte materno .Il latte di blatte di fogna ,serve per ammalare i bambini . 😡😡😡	asina	0	0
20030	@marcell77540365 Una che scrive asina spagnola ne ha di boria da vendere.	asina	1	0
20031	Ma davvero si vuol far passare sta asina spagnola come un personaggio rilevante? Questa cosa fa paura! #gfvip	asina	1	1
20032	#gfvip queste persone non sono NEUTRONI\nASINA IGNORANTE. SI DICE :\nNEUTRALI\nALLUCINANTE ALTRO CHE LAUREA O LATINO https://t.co/xZyrtvYm6v	asina	1	1
20033	@HoaraBorselli ah ok...il problema è il correttore;\naltra buona occasione per andarsi a fare una corsetta con orecchie da asina	asina	0	0
20034	@GiorgiaMeloni lo capisci o che noi Italiani veri non vogliamo la guerra e dare armi all'Ucraina??? Cazzo!!!!! Ma sei proprio un' asina di coccio!!!! https://t.co/IRHFyISIO5	asina	1	1
20035	@Takutakualb @LaSignoraLupo Si definisce socialista NON liberale. Qualunque cosa voglia dire, è sulla confessione religiosa che ...casca l'asina!	asina	1	0
20036	@Loredana_Dana75 Più che un pony mi pare un asina!	asina	0	0
20037	@virnetta8 @Adrianaerosario 😂😂😂peccato che l’unica asina sei proprio tu e anche cattiva	asina	1	1
20038	La palomballe si rivela per quello che è. Un asina\nLa corte costituzionale ha rigettato più e più volte \nla modifica del #41bis \n\nQuindi non c’e’ cazzo che tenga. \n#staseraitalia	asina	1	1
20039	@RobertoAvventu2 La Burioni della geopolitica, un'asina! #Tocca	asina	1	1
20040	@gaga_inside E anche per il latte d’asina.	asina	0	0
20041	buona domenica 8 gennaio l'asina di Balaam: cercare la verità e fare la cosa giusta https://t.co/izCv55hBxG via @YouTube	asina	0	0
20042	@rosikone Mah hai avvalorato la mia tesi: nessun genitore è perfetto, quindi un figlio venuto al mondo da una vacca piuttosto che da un’asina e poi dato a crescere alle scimmie piuttosto che ai cavalli non fa alcuna differenza. Questa polemica su froci e uteri a pagamento è inutile.	asina	0	0
20043	@DarkLadyMouse @a_meluzzi Anche chi non si è vaccinato lo ha fatto per tutelare la propria salute, visto che trattasi di 'farmaco sperimentale '. Questa è la differenza tra i "fedeli" delle virostar (bugiardi) e chi ha ancora capacità di Discernimento. Asina.	asina	1	1
20044	@2022Lina53 Roba da mettere le mutande ad un’asina	asina	0	0
20045	@Semreh10 devi leggerla al contrario, asina	asina	1	1
20046	@stevieansioso L'asina non sa neanche che nei 3 anni non abbiamo vinto un cazzo.\nCome si disdice il canone?😡	asina	1	1
20047	Magari Potesse entrare a fare parte della giuria, oltretutto è molto più competente di quell'asina della Luccarelli!!! https://t.co/a95OcrXaXK	asina	1	1
20048	Vicenza, i gatti uccisi e l’asina ferita a fucilate: quei violenti che odiano gli animali https://t.co/CV8tVv8dMl	asina	0	0
20049	@AnnalisaChirico Ma te la scuola l'hai frequentata solo per far spendere soldi agli italiani?\nE perché usi il punto esclamativo al posto dell'interrogativo asina?😏	asina	1	1
20050	Chiedo per una amica: i noodles sono il nuovo latte di asina? #jeru #barulino https://t.co/dRgPVhcYil	asina	0	0
61201	avevo chiesto a mia madre di andare al mc domani e lei ha dovuto dirlo per forza a mio padre e ora lui mi ha urlato contro che sono una balena e che faccio schifo	balena	1	0
61202	@grignanipage In c… alla balena 🌈🌈	balena	0	0
61203	RT @ArditoAspetto: @UNIREDPILL Ahahahahahah. Una balena che detta le condizioni. 1,70 senza tacchi e 120 kili senza mutande.	balena	1	1
61204	@brina444 quanto cazzo mangi porco due sei na balena pe spende 80€ de cena de routine	balena	1	1
61205	RT @donvitorap: metafora di GIGA elefante formica o balena ha cervello cento giga umani ha 3 giga ahahah SCEMI SCEMI come la canzone di Vasco	balena	0	0
61206	@UNIREDPILL La balena spiaggiata e pure vecchia, sta a fare la schizzinosa ma manco i vucumprà della spiaggia se la pigliano.	balena	1	1
61207	@__MrsUoma__ In realtà lo uso pochissimo..di tanto in tanto mi balena l'idea di buttarlo giù..	balena	0	0
61208	@meandmilli Per quando non mi piaccia, bisogna dire che si è girata così quando ha sentito dire da Micol che forse non può indossare nessuno dei tre vestiti perché è diventata una balena (cito testuali parole)	balena	1	0
61209	Ma micol, come fai a dire che sei una balena?\nSe bellissima ❤️ #incorvassi #gfvip	balena	1	0
61210	@meandmilli Si è girata così al suo "sono una balena", questa volta la faccia era identica alla mia 😂	balena	1	0
61211	@Ileniastellaa Perché dice di essere una balena	balena	1	0
61212	povera cucciola ha detto che non sa se le stanno bene perché si sente una balena 🥲\n#incorvassi #GFvip https://t.co/60dVw5HQLG	balena	1	0
61213	Ma quale balena, se è dimagrita un botto 🤦🏼‍♀️ #INCORVASSI	balena	1	0
61214	Micol se dici ancora di essere diventata una balena ti vengo a picchiareeee #incorvassi	balena	1	0
61215	Micol che dice che non sa quale vestito le stara' bene perché è diventata una Balena #incorvassi	balena	1	0
61216	Nel video una balena spiaggiata sulle coste di Long Island. Nell'ultimo mese sono sette i cetacei trovati sulle rive degli stati di New York e New Jersey, alcuni danno la colpa ai lavori di preparazione dell'eolico offshore https://t.co/dlxXZiyZQA	balena	0	0
61217	@sonoilgrinch persona più felice del mondo. Faccio ancora fatica a guardarmi allo specchio perché vedo sempre quella “balena” come mi definivano e inizio solo ora a sbloccarmi nel parlare con le persone	balena	1	0
61218	la riunione\nfissare\npiovere-pioggia\nflauto\ndeciso-decidere\ncominciare/camminare\ninsistere-insistito\nesprimere/espresso\nprodurre-prodotto\nspegnere/chiudere\naccendere-acceso\nspegnere-spento\nprestare/ridare\noltre/altro\ndomanda/risposta\nannullare\ncilindro\npesca/pesce\npiccante\nbalena	balena	0	0
61219	@fillequisiffle mi par il minimo, sto bisticciando col mio comune perché la mettano dove sto: sostanzialmente in culo alla balena 🤣	balena	0	0
61220	@eretico_l @modamanager @laperlaneranera @Anna302478978 @SmitArianna @lisargadata @Victoria_Wet @Dorayak56884206 @PaolaSimonin @Charles96432447 @avinumalkeinu @Overbite71 @ACCEDIALSITO @Luky_Alfio3945 @MariaFi27832951 @francobaietti @d_essere @armidmar @digibaby @ilbuonpaztore @MarcoLu41052677 @Giovanni7769 @LONG00885513 @Th3P3ck @sedicizero @bevilatazza @Emanuelesecond @LuciusV72261299 @Gabriel0…	balena	0	0
61221	In quanti sogni e mani scivolavano pagine di memoria -\nOpera di V. Balena.\nhttps://t.co/URGbzEt1vm\n\n@zuccaro_sonia @pa_raffa @CarmelaCusmai\n@PCattoretti @vitadaMaestra_ @SiMu2021\n@IlvaMenchini @IvoMandarino @UnmondodilibriC\n#BuongiornoATutti @MicScianca \nhttps://t.co/T6GEjpCfA5 https://t.co/JiJWkLzjPm	balena	0	0
61222	#Cristianità\n⚠️vietato🚫\n-🐬🐳🐋🦈 delfino, balena, orca, squalo \n(in #giappone li mangiano)\n\n⚠️vietato🚫\n\n- 🐙🦑🦐🍤🦞🦀🥟🐚 polipo, seppia, gamberi, gamberetti, aragosta, granchio, vongole, cozze\n(paesi sud asiatici lo mangiano per tradizione, paesi occidentali come trend)	balena	0	0
61223	Musica &amp; divertimento, Manuela Bollani ospite dei Giovedì della Balena https://t.co/sPw9Bo6Lk5	balena	0	0
61224	@fabcet Vero. Ma almeno nella balena bianca i ministri non sparavano boiate in continuazione 🤬	balena	0	0
61225	Manuela Bollani il 2 febbraio ospite ai Giovedì della Balena a Rosignano Solvay https://t.co/zUqBDymBhg #show #showtime #febbraio #ArtistOnTwitter	balena	0	0
61226	tra donne poi è uno schifo sentire certe battutine "sono grossa mamma mia ho le gambe da balena" ed erano magre vabbè chiudevo un occhio però poi diventava anche pesante la cosa	balena	1	0
61227	@diehexe68 Non perderti gli stupendi particolari invernali da fotografare, mi raccomando; ogni scatto racconta una storia \n(Devo dire che mi stó appassionando, già mi balena l'idea si prendere una reflex...) \nBuona giornata 💙🌸	balena	0	0
61228	Manuela Bollani ai Giovedì della Balena https://t.co/jv9kznZeFw via @Oltrelecolonne	balena	0	0
61229	unica cosa bella è che ha detto che pesa 60kg adesso quindi peso meno di lei anche se sembro una balena 😍	balena	1	0
61230	@pap1pap "Guarda Pap, una balena!"	balena	0	0
61231	@pasqualevatino @Rossy_only @Daje77 Hai ragione, e mi mancavano pure, anche se sono altrusta, se trovassi qualcuna, dono tutto il grasso di balena😂	balena	1	0
61232	@paola_demicheli Evviva la balena bianca di buona memoria!! Quante volte vi dovete spiaggiare prima di rendervi conto che siete troppo diversi e non trovate contenuti condivisibili intorno ai quali consolidarvi e ricostruire?Non perdete + tempo e trovate una nuova classe dirigente.	balena	0	0
61233	In #Giappone spunta la carne di balena nei distributori automatici, polemiche dagli animalisti\nhttps://t.co/qyKuGo935p via @LaStampa	balena	0	0
61234	P. Manuel João, comboniano\nRiflessione domenicale\ndalla bocca della mia balena, la sla\nLa nostra croce è il pulpito della Parola\n\nLE OTTO PORTE DEL REGNO\nIV Domenica del Tempo ordinario (A)\nhttps://t.co/kDjqlXnudx	balena	0	0
61235	Uno squalo balena fa uno spuntino veloce.🐋\n https://t.co/A85V5Io0Js	balena	0	0
61236	@PdorKmerson "fanno salire", I mean. Il senso è che i giganteschi uccelli-simha portavano ai loro nidi come prede balene (timi è un grande pesce balena-like) ed elefanti.	balena	0	0
61237	Sono di nuovo una balena, ma i denti si stanno sbiancando e sono una bimba felice 🥺	balena	1	0
61238	@dsaltari @perelaa Rigorosamente da indossare in abbinamento agli occhialini stile Kanye in osso di balena https://t.co/C6ejpZdrDE	balena	0	0
61239	"Le balene non cantano perché hanno una risposta, cantano perché hanno una canzone."\nGregory Colbert\nIn Giappone un'azienda ha reso disponibile carne di balena nei distributori automatici \n#whale #whales #Japan #naturelover #art #artworks #arte #artists #draw #draws #drawing https://t.co/P6sXuQhjIs	balena	0	0
61240	Giappone: carne di balena acquistabile nei distributori automatici - https://t.co/cQhrh1LZ81 https://t.co/eijebyLBDd	balena	0	0
61241	@1V4vendetta anche noe ' dell arca e jona nella balena..mose' pure era ucraino ... forse pure jesu' ahaha🤪🤪	balena	0	0
61242	Quanto sei vecchio!! Perche non torniamo alle lampade con il grasso di balena ! https://t.co/0DQEWBAwoN	balena	0	0
61243	#100GiorniDiCoseBelle\n\nHerman Melville - Moby Dick \n\nCome può evadere il prigioniero se non aprendosi un varco attraverso il muro? Per me, la balena bianca è quel muro. Talvolta penso che al di là non ci sia nulla. Ma mi basta. Mi occupa, mi colma	balena	0	0
61244	@ilpitagora @matteosalvinimi Quando ti balena in mente che dalla ramanzina senza pena per furto puoi rischiare di farti 20/30 anni per omicidio vedi come cambi atteggiamento... son tutti buoni con i figli sotto i treni degli altri!	balena	0	0
61245	Oggi ritorno in piscina dopo 12 giorni senza fare nulla. Se non faccio la balena poco ci manca	balena	1	0
61246	E' una... Balena che ha perso l'orientamento 😂\n(o è una furbastra che ha voluto far parlare di sé) https://t.co/jMzJ57Xmcv	balena	1	1
61247	@drvcarys_ @Dysagyo_ Tra il non normalizzare e il dargli della balena ci sta l’oceano pacifico.	balena	1	0
61248	@borghi_claudio Non lo deve spiegare a noi.\nNoi elettori, in buona parte, lo sapevamo già\nNon è che per distinguere una balena da un pero serva una laurea in biologia o almeno un diploma da perito agrario.\nTremaglia fraintese il "me ne frego" degli italiani all'estero e altri si sono organizzati	balena	0	0
61249	Ancora sta balena, ogni volta che apre bocca è un aborto https://t.co/JzL7dtvfci	balena	1	1
61250	@KasperReloaded La consapevolezza rende esausti e non sarebbe un riposo quello che ti balena in mente ma una rinuncia a essere te stesso.Non si può. Qualunque sia la fine la dovrai vivere proprio perché non hai accettato la comodità del pensiero uniforme, dell'omologazione, cercando la Verità.	balena	0	0
30001	quelal bambola pazza era una wolfgang stan lo posso percepire	bambola	0	0
30002	@GrandeFratello Nemmeno Antonella con te, tranquilla, bambola assassina😡😡😡😡😡😡sei solo gelosa perché vorresti essere come lei... Il nostro 🌞	bambola	1	1
30003	Visto M3GAN e tbh la vorrei pure io la bambola assassina che mi canta Titanium per farmi addormentare	bambola	0	0
30004	Bambola assassina #gfvip https://t.co/hrniR4bpS1	bambola	0	0
30005	@Ughigu1508 @lefrasidiosho Io ho un opera con la bambola gonfiabile volante 🤣	bambola	0	0
30006	#Gfvip Edobau al femminile è molto meglio, ha proprio la faccia da bambola assassina 🤣	bambola	1	1
30007	@sunnysrequiem hey bambola guarda che ho messo lo smalto nero e ho fumato ciao banvola	bambola	1	1
30008	La bambola assassina https://t.co/Pfc2UenA4o	bambola	0	0
30009	@Bho98496481 Anche la bambola di ceramica ne ha 30.	bambola	0	0
30010	#donnalisi cqe due cose:\nEdo e Daniele con quelle parrucche inguardabili😂😂\nMio figlio passa davanti alla tv e mi fa: la bambola assassina😂😂😂😂😂😂\nChe streghe, hanno proprio quell'acidume rabbioso..	bambola	1	1
30011	@annefake_ io a te bambola	bambola	1	0
30012	@_blubluu_ Oh cazzarola arrivo bambola	bambola	1	0
30013	La falsità di O.e della bambola assassina non ha prezzo #donnalisi	bambola	1	1
30014	Tavassi,Luca onestini è Oriana vesitit così stasera mi Fanno morire.. Tavassi troppo forte 😅😅 Oriana sembra una bambola bellissima. ❤️🤗 #GFvip #Oriana #oriele	bambola	1	0
30015	Daniele sembra la bambola assassina ⚰️ #oriele	bambola	0	0
30016	purtroppo vi bloccherei uno ad uno quando scrivete “antonella basta” “anto accanna”, ma vi pare una bambola? ma tacete #donnalisi	bambola	1	0
30017	@southernmilf5 @MatureMaturibsx @Guy77The Wow sei una bambola	bambola	1	1
30018	ORIANA SEMBRA UNA BAMBOLA 😭😭😭😭😭😭😭😭😭😭	bambola	1	1
30019	mamma mia che bambola ✨\n#incorvassi #GFvip https://t.co/Vzl1NsrY66	bambola	1	0
30020	💥OFFERTA!!💥38% sconto su Barbie L'Armadio Dei Sogni - Con Bambola Barbie Bionda - Specchiera - Oltre 25 Vestiti e Accessori Barbie - 60 Cm - Regalo per Bambini dai 3... \n\n❌ precedente 85.99€\n✔️ ora per 52.97€ #offerte\n\nNegozio: https://t.co/roKDV45OTh\n\nFai RT e condividi https://t.co/WzB0Q0K3Ow	bambola	0	0
30021	@occhiblumare09 Wow sei una bambola	bambola	1	1
30022	@mrslt1sdale8 @TheOGBBuster Figaro sei una bambola ti donna me lo fai sapere diventare duro e mi fai sempre venire voglia di essere lì per farti	bambola	1	1
30023	@porcellina881 Cavolo sei una bambola ti farei più che volentieri	bambola	1	1
30024	#gfvip voi non notate una certa somiglianza con Micol e la bambola assassina	bambola	1	1
30025	@imacurvygirl60 Porca vacca ho proprio ragione ha dire che sei una bambola hai un corpo da favola	bambola	1	1
30026	@xanderspace @ricckardsummer E certo, “annabelle” e “bambola dell’orco” non l’ha scritto, nono 🤡	bambola	0	0
30027	@Fra0_10 Una bambola la foto più bella er una donna ❤️❤️❤️❤️	bambola	1	1
30028	@fcin1908it @Inter_1908___ Ma mi tengo tutta la vita Lukaku che questa bambola di porcellana che in 2 anni ha giocato meno minuti di Aslani in questa stagione.	bambola	1	0
30029	bambole accessori miniatura paesaggio mobile bambola zaini per barbie\nhttps://t.co/j5vDOWWlM9	bambola	0	0
30030	… nel frattempo ottenne ha deciso che non vuole crescere perché ha paura di invecchiare e morire, io gli spiego le mie paure degli 8anni:una bambola e una pubblicità, faccio una ricerca, le trovo, e lui? Ride 😤🙄☹️😎	bambola	0	0
30031	@chicco_pit Ci sarà quello che si è sposato con una bambola.	bambola	0	0
30032	@chicco_pit Uno si è sposato con una bambola gonfiabile, mi sa😂	bambola	0	0
30033	I grillini quando vengono incalzati sui contenuti,come Appendino con Calenda o Castelli con Padoan vanno in bambola. Si estraneano per concentrarsi su cosa obiettare. È comprensibile, mica è facile argomentare il nulla. Infine,messi alle strette,risponono: più o meno "mistero"!	bambola	0	0
30034	(ci tengo a precisare: battuta leggermente rivisitata e rubata che ho trovato in tl in settimana ma non ricordo chi l'avesse detta comunque bambola evergreen bop)	bambola	0	0
30035	@Penelopebdg E quello laggiù *sorrisi guardandola* un lord spagnolo , non ha titolo e non ha molte proprietà però sembra gentile , insomma pensa che ha regalato anche una bambola ad Elaine non gli importa se ho una figlia *sorrisi* solo che è nuovo a Londra..-	bambola	0	0
30036	@SVFTL0KI giusto giusto\nauguri bambola +21	bambola	1	0
30037	@NikitaUragano L unica lì dentro bullizzata Nikita non questa bambola di plastica senza contenuti	bambola	1	1
30038	@SalvOasi La bambola di Candy Candy, l'avevo!!	bambola	0	0
30039	@baffi_francesco Sembra una bambola gonfiabile	bambola	1	1
30040	@Esaurita69 @BITCHYFit Il papà si vede che ha investito parecchio sulla figlia. E più come la sua bambola che come sua figlia. Padre tossico azzeccato come soprannome. #GFvip	bambola	1	0
30041	@GrandeFratello A me non interessa vedere la bambola assassina al #gfvip.\nChe bugiarda. Non perde MAI occasione di sparlare di Antonella. Ahahaaaaaa\n\nGrazie, puoi tornare a casa!	bambola	1	1
30042	Auguri e bambolotti maschi. 🤦\n#bambola\n\nhttps://t.co/yRtALJ0HhB https://t.co/5vFuTUVlFQ	bambola	0	0
30043	@Gab2812All @teamsoleilsorge Io non sopporto la bimbaminchia a prescindere da Antonella, odiosa lei, i suoi capelli finti e schiacciati per non parlare di quei vestitini orrendi tutti uguali che si mette sempre. Identica alla bambola assassina	bambola	1	1
30044	@Rosy26008342 Aspetta che ti lancia una bambola gonfiabile come salvagente 🤭🤣🤣🤣	bambola	0	0
30045	@simone_volponi La bambola, si fa per dire, assassina	bambola	0	0
30046	Voi la esaltate, e anche a me Oriana concorrente mi piaceva, ma vederla tutta soddisfatta perché l'uomo che costantemente la tratta di merda non è riuscito a resisterle, lo trovo di un patetico incredibile.\nCosa c'è di bello nel farsi trattare come una bambola di pezza? #gfvip	bambola	0	1
30047	@sonotantaroba Ciao bambola ❤️💋 https://t.co/Yt32LBKUAY	bambola	1	0
30048	cosa sono senza di te bambola https://t.co/KDfSdh6fUv	bambola	1	0
30049	@francescaditom6 Mica è un mistero che a Daniele piace fisicamente. Lui nn vuole una storia seria ma proprio per questo lei dovrebbe avere un minimo di dignità invece lei si fa trattare come una bambola gonfiabile #GFvip	bambola	1	1
30050	@PSospesa Che bambola	bambola	1	0
70001	@mrsmommare Vuoi il mio piede dentro rispondi cagna!	cagna	1	1
70002	@ka_dge Si in questo caso si usa il verbo tenere, invece di avere, specialmente in Campania! \n‘tengo 'a cazzimma e faccio tutto quello che mi va\npecchè so blues e nun voglio cagnà’ 🎶🎵	cagna	0	0
70003	Ma com si Bell fatt guard tu tien o zuccr rind o cor tu tien o ben rind o cor tu Ca quan tagg cunusciut me regalat o ben me fatt addivinta chiù femmn t vules ricr nu cagna Maj e nu darett a niscun sul o cor t Ric chell Ca pruov tu si bellez e si ben t vogli ben assaj e fa cos bon	cagna	0	0
70004	@serenasummerss cagna	cagna	1	1
70005	@BungaBu72537413 @LibertaMario Perché un koglione come te non è in grado di capire la differenza tra stupratore e donna vittima. E come dice il tuo Nick, siete pochi ma buoni figli della cagna russa. Talmente koglione che neanche la Wagner ti prenderebbe come scopamico. AGENDA2023 così ti trovi in compagnia	cagna	1	0
70006	Se lo ricordasse quella cagna! https://t.co/4lA0qvtt53	cagna	1	1
70007	@RossiniBetty 1 pugno dentro quel culo da puttana,troia cagna in calore	cagna	1	1
70008	Oriana e Daniele devono mettersi d’accordo su chi è il cane/cagna e chi il padrone/padrona\n\n#oriana #GFvip https://t.co/3fCV6JwU0M	cagna	0	0
70009	@ClownWorld_ Ľaudacia di questa cagna, veramente quando non sapete cucinare, è sempre meglio non sprecare cibo, porca miseria e vaffanculo, porcacciona!	cagna	1	1
70010	@dettellina11 Peccato oggi l ha scampata quella cagna	cagna	1	1
70011	@Pat_Zago @Leoncina1971 E la cagna cosa magna?	cagna	0	0
70012	@ElisaeTh19 No , una mia amica .. la sua cagna a fatto 5 cuccioli , Labrador marroni .\nLa mia è nera ma ha gia 5 anni	cagna	0	0
70013	@Marzia_Tortora Credo che tu parli solo smentiscono e scrivimi cagna	cagna	1	1
70014	@Marzia_Tortora Non solo in culo troia di una cagna in calore\nNon mi posso iscrivere in nessun sito ma sono un gran porco con un bel cazzo scrivjmi se lo vuoi	cagna	1	1
70015	@errefnt Ma feelin cosa? Sei una cagna	cagna	1	1
70016	Bastardi, chiamo da Reggio Emilia, sono un assassino di meridionali. Vi ammazzo tutti bastardi pezzi di merda. Porcodio a tutti i napoletani romani di merda stronzi, siete della gente che viene schiacciata come topi maledetti stronzi figli di una cagna in calore. Io vi sp..	cagna	1	0
70017	@R0ByX @AlfioKrancic Noi siamo fatti con lo stampino? Dite le stesse cose tutti come un comandamento e saremmo fatti noi con lo stampino. Cerebroleso te l'ho gia detto novax lo vai a dire a quella cagna che ti ha partorito	cagna	1	1
70018	@FinallyMichele Cagna maledetta	cagna	1	1
70019	@cathevillareal non voglio una cagna un cane ce l’ho giaaaa	cagna	0	0
70020	@laura_pampers Hai perfettamente ragione, una cagna in calore per essere precisi	cagna	1	1
70021	@aMonicaBellucci Che cagna!	cagna	1	1
70022	@FinallyMichele Qui c’è del disrispetto per la cagna e Stanis	cagna	1	1
70023	Niente, non li mollo anche dopo che sborrano, devo continuare a dargli i bacini.. 😍🥰 https://t.co/wVOVe0FKW7\nhttps://t.co/BQP0dg0tuz non vedo l’ora di farvi vedere i piselloni romani… 🐷 Ti aspetto dentro, iscriviti! #troiaitaliana #pornoamatoriale #cagna https://t.co/a9OovfQQKL	cagna	1	0
70024	@IannuzziSilvano @IvanBiancoNeroJ @Pistogolblasta2 😂😂😂😂 per vincere uno scudetto vi siete inventati farsopoli e parli… torna nelle fogne aborto di cagna malriuscito	cagna	1	0
70025	@RossiniBetty Brava cagna in calore!!!...PUTTANA!!!...così si fà...bevi tutto e spalmatene un pò in quella faccia da troia...e poi sì...piscio...a ancora piscio...in tutto in corpo da puttana..e 1 bella leccata di culo che farai...troia...facci eccitare	cagna	1	1
70026	La povera Corinna Negri veniva chiamata cagna maledetta per una recitazione di questo livello https://t.co/qzYBuKJPJe	cagna	1	0
70027	@regina_dicuor Visto che sei na cagna, probabilmente la lasagna.	cagna	1	1
70028	@Andrea93932 @Profilo20221 Chi sei tu per dure cagna e zoccola alle persone? \nO dire a lui che nn ha cervello che è deficiente? .chi cazz sei tu!!!	cagna	1	0
70029	@Profilo20221 @Andrea93932 Zoccola cagna cessa , senza cervello demente .. si scherza?eh no!	cagna	1	1
70030	@Andrea93932 @Profilo20221 Tu come ti permetti di dire cagna zoccola ec ecc e a lui senza cervello ecc ecc \nAccanna,!! \nSemini odio per il nulla .\nChe commenti beceri che fai . \nSi chiama educazione!!!	cagna	1	0
70031	@Profilo20221 Senti il rumore dei baci ..che cagna in calore che è sta schifosa	cagna	1	1
70032	@CeeAnna20 Vediamola in funzione cagna	cagna	1	1
70033	@gieipeg1 Non sei una vera cagna se non pompi in discoteca	cagna	1	1
70034	abbai pure cagna?	cagna	1	1
70035	@dadegre Nel giro siamo passati dai miei nipoti e si è scofanato mezza ciotola dei crocchi della loro cagna…erano stati lasciati in giro e sai com’è, servivano per ristorarsi	cagna	0	0
70036	@Uberbored_80 auguri cagna maledetta! 😍😍😍	cagna	1	0
70037	@mraverage_it @colombomauro @AndrewPattone Io me lo ricordavo un po' meno cagna 🤔	cagna	1	0
70038	@masterpharaon90 @GianniTo1966 Cagna a me??? Razza di randagie senza pudore!	cagna	1	0
70039	#cagna #mistressmilano #dungeonmilano #sexsado #slave \n#schaivodimerda prelevato per adorare la #padrona e la sua amica #leatherdom https://t.co/iFiNA11W0K	cagna	1	0
70040	nn riesco a trovare il video di Chiara D'Alessandro in cui dice cagna uouououo ti fai le goccioline di pipì addosso cagna auuuuuuuuuu sicuramente sarà una live ma quale delle tante ke ha fatto	cagna	1	1
70041	#cagna pronta per essere …? \n#slave #schiavodimerda #sexsado #bdms #strapon #gayleather https://t.co/A2cuobyO1G	cagna	1	0
70042	@nessdimportante La mia cagna allego foto https://t.co/TrESO3vZnD	cagna	0	0
70043	@Barbara00507780 Ti ha fatto lui la foto? Sei una cagna	cagna	1	1
70044	Francesco Merola - Cosimo Livello Alto - Napule nun cagnà https://t.co/PNdXrnSAYN via @YouTube	cagna	0	0
70045	@ARCHI01001100 @Jessica07476852 E tutta una truffa falsi organizzato dalla cagna n calore che si fa pure inculare dai negri	cagna	1	1
70046	@RossiniBetty Facci vedere la tua faccia sborrata...cagna	cagna	1	1
70047	Sta cagna infame: prende ordini dagli stragisti (al secolo chi l ha messa dove sta dopo la #InculatadiFini e si inventa il pericolo #terrorismo le figlia di nessuno.\n#GiorgiaMeloni\n#GovernodelaPuttanella\n#56esimiBerlusOcculto\n#mafia #politica #massoneria\n\nhttps://t.co/6r68Cji5v6	cagna	1	1
70048	"ma dai tutt* sono rimast* devastat* da ice merchants chissà com'è" dissi io, prima di vedere ice merchants, inconsapevole del fatto che avrei sofferto come una cagna alla visione dello stesso	cagna	0	0
70049	@alevilla1978 Che Shelton abbia una cagna (così come Rune) l’ho notato anch’io. Anche Jannik sembrava così nel 2019-20 rispetto a Zverev medverev Rublev… \nSimone caratterialmente è uno un po’ “clickbait”, poi si entusiasma facilmente e se lo perde anche velocemente.	cagna	0	0
70050	@majewsky2000 valorizziamo le nuove frontiere del marketing Made in Naples... come disse qualcuno "Napule è comm'e na vota, ma tutte ricene che addà cagnà"... c'è qualcuno che continua a non essere d'accordo, e fa di testa sua...	cagna	0	0
80001	@alecasu1994 @GrandeFratello Faccia da cavalla 💩	cavalla	1	1
80002	@teamsoleilsorge Faccia da cavalla donnetta inutile che crede di essere la meglio	cavalla	1	1
80003	@HITOMl_TANAKA Una bella cavalla	cavalla	1	1
80004	Nn si capisce se si tratta di una cavalla o un cavallo...roba da nn credere 😁😀🤪 https://t.co/rmO98OAoBS	cavalla	0	0
80005	@Giovanni_Esse La femminista più bella che intelligente..ma questo già si sapeva 😂😂😂\nLa nasona la chiamo io 😈😈😈\nMamma mia quanto e brutta la cavalla nasona	cavalla	1	1
80006	@Andrea_ADF1 Condivido pienamente èuna gran Puledra purosangue se fosse una cavalla sarebbe il più pregiato Arabo 🐎	cavalla	0	0
80007	@Giovanni_Esse Una cavalla ignorante	cavalla	1	1
80008	@lafemmelouisse Ma de chi parli cm è successo e cm può succedere cn una cavalla da monta cm te io nn me lo spiego ho un cazzo che sembra un toro io chi hai il pane nn ha i denti e chi ha i denti nn ha il pane	cavalla	1	1
80009	@mart120600217 Ammettere che avevate ragione a chiamare una donna zecca, mantenuta, tr*, vergognosa, imbarazzante, cavalla, brutta, inquietante, stalker e altri epiteti simili?\n\nNo, grazie.	cavalla	1	1
80010	Grazie a chi ha provveduto alla cavalla, comunque, meglio l'abbiano abbandonata, piuttosto che portarla in un mattatoio, questo mi sento di doverlo dire, pur certo non sminuendo il reato di incuria. https://t.co/8ELTlpMnTM	cavalla	0	0
80011	Rosignano marittimo, condannate due donne per abbandono di cavalla https://t.co/DSEBFdWqyM via @@horse_angels	cavalla	0	0
80012	Cavalla lasciata sola per mesi senza acqua né cibo, madre e figlia condannate per abbandono di animali. @LAVSediLocali @LAVonlus 👏👏👏 https://t.co/ESuENTDwtp	cavalla	0	0
80013	@Giovanni_Esse Anche per i denti da cavalla e per la dimostrata scarsa intelligenza.\nSi insomma, una cavalla ignorante.	cavalla	1	1
80014	@JediPerLItalia Bigoli al ragù, soppressa, sflilacci di cavallo e bistecca di cavalla. Tipico menù padovano…più o meno	cavalla	0	0
80015	@gigibarbergirl Ohhh Gigi...ma non è caldo, tu capelli lunghi e belli... sei una cavalla...sei brava🥰🥰😍	cavalla	1	1
80016	@saintouge @icy_thecreator Lo sto guardando mo, dammi tempo cavalla pazzoide	cavalla	1	1
80017	@MarcoFattorini Fa piuttosto ridere che il Cinada di Trudeau, la NZ della cavalla pazza e l'Australia delle stragi vaccinali obbligatorie siano nell' 8% di "full democracy"\nO devo pensare a un bias di tipo politico da parte di EIU, o devo pensare che "full democracy", sia da evitare.\nO entrambi	cavalla	0	0
80018	Pallina (mamma di Pallino, perché la fantasia è patrimonio comune da queste parti) in posizione per l'azione di disturbo durante l'operazione di impasticcamento della cavalla (ah, @Lizzie_Tito, a proposito di nomignoli offensivi, l'equina è passata da Stronza a Vecchia Stronza😁) https://t.co/kRSaFPsxYZ	cavalla	0	0
80019	@Pattichiari @DeG05051980 @alex_orlowski Eh lo so, la tu mamma è na cavalla. 🤣 questa è servita su un piatto d'argento.	cavalla	1	0
80020	Tieni cavalla del mio cuore😭 @alcolicah https://t.co/tv6Fb4xddK	cavalla	1	0
80021	🐎"I Carabinieri forestali hanno seguito il caso con quel pizzico di cuore utile a soccorrere tempestivamente Altaluna e trovare, insieme a noi di LAV, la soluzione migliore per la sua salvaguardia".\n@LivornoToday racconta la storia della cavalla Altaluna👇https://t.co/GO8ZA4AhZ9	cavalla	0	0
80022	@RonaldL82181810 La cavalla l'hai vista però eh! 😂	cavalla	0	0
80023	Da #BeppeGrisoni questo magnifico paesaggio innevato sul Monte della Cavalla. Tanta neve, tanti narcisi? Speriamo! @ValliAntola @lamialiguria bianca https://t.co/DbzDhBNCHI	cavalla	0	0
80024	La mia cavalla mi fa pisciare sotto https://t.co/1HuwTseO3h	cavalla	0	0
80025	@Marco__Samp il cavallo e la cavalla	cavalla	0	0
80026	È il partito dei ricchi, facciano una sottoscrizione e delle cene a pagamento con la cavalla o la Serracchiani https://t.co/HF2Z3nj46D	cavalla	1	1
80027	@italy_marcella @rio_fopora @pic_poster @DaveKohenn @LinguaLungaa @TsPornstarsXXX @transwomenont @transloverxx2 @Bellakristina20 @ShemalesAgency @topshemales121 Cristo santo... che sborra!! Hai schizzato come una cavalla!	cavalla	1	1
80028	@ciccimitterrand dannata cavalla e la sua fama e quando la gente dice che è underrated?? Ma dove?? Guarda che cazzo di numeri pd	cavalla	0	0
80029	Il Tribunale di Livorno affida definitivamente a LAV la cavalla Altaluna https://t.co/wWMzd9gZPB via @Il Portale del Cavallo	cavalla	0	0
80030	in fila per provare a comprare i biglietti della cavalla avevo letto quindicimila persone davanti ho pensato buono dai poi ho visto meglio e sono centocinquantamila https://t.co/K7pohjrlLt	cavalla	0	0
80031	@boni_castellane Una cavalla di razza	cavalla	0	0
80032	@sofia_siena Una bella cavalla di donna 😘😘😘	cavalla	1	0
80033	@shapleyyyy vabbè magari fossi una cavalla pagherei per quei 6 cm in più	cavalla	1	0
80034	@shapleyyyy AMO?/!2!/!:??? no amo mi crolla un mondo di convinzioni addosso per me tu eri una stanga una cavalla almeno 1.70	cavalla	1	0
80035	@lingeriebaybe Che cavalla.... Ti sbatterei forte fino a farti dire basta tesoro	cavalla	1	1
80036	@angelagiusti079 @koe0712 @SoleilSorgeFan Finché gli autori saranno del branco tavacasso la cavalla non sarà oggetto di attacchi così schifosi e denigratori! E se le dicono donna di facili costumi dicono la Santa verità! #nikiters #HUNICA #dakita #nikella #nikivip	cavalla	0	0
80037	@saraepunto Eh no, sta dietro quindi ce vuole un calcio da cavalla così https://t.co/6ivSXy9fXK	cavalla	0	0
80038	la faccia da cavalla.. https://t.co/1EmI5yK1cx	cavalla	1	1
80039	@Marco__Samp Che cavalla puro sangue	cavalla	0	0
80040	#Oriana che sta insegnando lo sketch a Nicol, stando molto attenta che lei non usi parole forti che possano infastidire Daniele e la corregge con parole più dolci, speriamo che vada tutto bene e che Nicol non faccia la cavalla pazza 😅 #iostoconOriana #Oriana #orianistas #oriele	cavalla	1	0
80041	@boni_castellane Chi, la cavalla? @ellyesse? Mamma fa paura, ma assomiglia tantissimo a Marylin Manson	cavalla	1	1
80042	Il Tribunale di Livorno affida definitivamente a LAV la cavalla Altaluna🐎\n\nViveva completamente sola, senza cibo, acqua e cure. Condannate per abbandono di animali le due proprietarie.\n\nBasta maltrattare gli animali!👇	cavalla	0	0
80043	@Vocedelpensier1 @Elewhatelse3 @ZombieBuster5 Un individuo può convincersi e/o immaginare pure che lei/lui una/un cavalla/o, ma non potrà mai ingannare la natura perché in fine rimane solo una donna o un uomo. Terzo è impossibile	cavalla	0	0
80044	@leoqazw Certo assolutamente sei una cavalla di razza	cavalla	1	1
80045	@freira_show Complimenti bella cavalla	cavalla	1	1
80046	@lafemmelouisse @donnaluissa Mmmmmmmmm se vuoi te la do io una conoscenza bella bella la vuoi vedere mmmmmm sei pazzesca da fuori di testa baby sei una cavalla da monta 💦💦💦💦💦💦💦💦💦💦🔥🔥🔥🔥🔥🔥🔥🔥🔥🔥🔥🔥🔥🍆👅👅👅👅👅👅👅👅👅	cavalla	1	1
80047	@EsercitoCrucian chi sarebbe la cavalla con le briglie 🤔	cavalla	0	0
80048	Non era una cavalla normale	cavalla	0	0
80049	@GrandeFratello E una cavalla e volgare tutto fuorché sexy	cavalla	1	1
80050	@lingeriebaybe Che cavalla da monta hmmmmm https://t.co/WPtZqtGlFS	cavalla	1	1
90001	@alwaysmyself87 Perché non ti fai uno spurgo al cervello? Non hai un cesso dove infilarti sotto lo sciacquone?	cesso	0	0
90002	@karsmj La cosa più surreale è che li shippano ancora bohhhh ma se quello è un cesso	cesso	1	0
90003	Spero che presto Oriana inizi a vedere Daniele per quello che realmente è, un ratto cesso #orianistas sono stufa https://t.co/ux7GwleE43	cesso	1	0
90004	MAMMA MIA REGA ERO AL CESSO E VI STAVO LEGGENDO MI AVETE FATTO VENIRE UN COLPO #oriele	cesso	0	0
90005	daniele sei un cesso con queste battute stop riprenditi	cesso	1	0
90006	Deve essere sempre cesso daniele non c sta nient a fa	cesso	1	0
90007	@gas_lerner Non sono una fallita e lavoro come tutti, Non me ne frega un cazzo dei soldi, vivo le mie giornate e la soddisfazione non arriva dal lavoro. E ho deliberatamente scelto di non usare i miei titoli di studio. Che posso anche buttarli giù per il cesso. Saluti ne	cesso	0	0
90008	pure il parrucchiere si è reso conto che è durato due ore il bacio vediamo se dopo fa il cesso oppure glielo dice https://t.co/dzHkVGSYFe	cesso	1	0
90009	ma che vuol dire che hanno litigato ma io non mi posso alzare manco 1 secondo per andare al@cesso #oriele	cesso	0	0
90010	Sono quell’amico che non ti manda le foto al cesso ma ti manda le foto del cesso dove ha appena cagato.	cesso	0	0
90011	nn posso nemmeno dire tanto era un cesso perche invece e un fico pazzesco. ma tu puoi ridurti cosi mio dio bestia k fastidio mi fa prudere le mani	cesso	1	0
90012	@Chiaratw28 @visegrad24 @KamilBortniczuk Quindi i russi normali magari quelli che non possono scappare e che non hanno il cesso in casa devono subire le sanzioni, invece quelli ricchi e famosi possono andare alle olimpiadi?	cesso	0	0
90013	@bts__haruman squallida sarai tu, l'unica volta che l'hanno chiamata pr giocare e lo hanno fatto apposta insistendo pure, ha fatto bene, almeno abbassa le ali quel cesso!	cesso	1	1
90014	devo andare al cesso portandomi il telefono sia mai che christian fa il decimo tweet in 5 minuti o alex dica frasi che solo lui stesso sa decifrare	cesso	0	0
90015	Questo fa il cesso e poi pretende pure che sia lei ad andare da lui. Boh #uominiedonne https://t.co/Y2cIgsydY4	cesso	1	0
90016	@provax922 È doppiamente coglione perché lo sapeva che Carola se ne sarebbe andata. Se sperava in una dichiarazione d’amore, la provocazione doveva essere ben diversa. Che ratto cesso!	cesso	1	0
90017	che coraggio baciare quel cesso intasato di tacazzi #gfvip	cesso	1	1
90018	@gicarestik2 Che cesso di persona Orianana 🤢🤢🤢	cesso	1	1
90019	@Mov5Stelle Attenzione parle il campione del mondo delle cazzate. Zitti zitti ascoltiamolo. Io lo faccio sul cesso. Mi stimola	cesso	0	0
90020	rocco ti devi vergognare non si invalidano i sentimenti delle persone così SEI UN CESSO\n#cepostaperte	cesso	1	0
90021	dai che cesso che fa finta di non ricordare	cesso	1	0
90022	@Silvia00072 Una caduta devi fare in cesso pieno di merda	cesso	0	0
90023	@hortominnesota Joe hai mai provato a mettere la testa nel cesso	cesso	0	0
90024	@PeppinInter Un cesso vivente	cesso	1	0
90025	@karikatura2609_ Bè le telecamere ci sono si chiama grande fratello tavassone de merda ...chiudi il cesso che c'è una gran puzza de merda💩💩💩💩🚽🚽🚽🚽	cesso	0	0
90026	@yooncyTV Esci dal cesso che devo cagare😒	cesso	0	0
90027	@NicolaPorro Le fanno presentare Sanremo pur essendo un cesso e si lamenta del razzismo. Allucinante.	cesso	1	1
90028	@agambella Soldi buttati nel cesso, bastava un ago	cesso	0	0
90029	@sh3stroia però almeno il cesso chiudilo	cesso	0	0
90030	@mariamacina Oppure spara citazioni in giudizio ad capocchiam al modico prezzo di 72mila euro\n🧻🧻Carta da cesso un po' cara...\n🧻 🧻 altro che rotoloni che non finiscono mai...	cesso	0	0
90031	@SalvOasi Un letto merdoso, un anno buttato nel cesso, non trovare lavoro se non sei militesente, la ragazza che ti lascia, far finta di rispettare degli imbecilli perché hanno un disegno diverso sulla spalla o più stelle sotto al basco.\nRicorda quando avevamo 20 anni, unico lato positivo.	cesso	0	0
90032	@luana14275 @MangelaVilo Che cesso	cesso	1	1
90033	@fradicidigioia e tu una subumana che difende un cesso subumano	cesso	1	1
90034	cazzo si apre la busta era pure brutto il tipo,se fosse stato un bonazzo già un pensiero ci stava ma era pure cesso	cesso	1	0
90035	Antonino (giustamente) SCHIFATO! Che cesso demmerda Edobau 🤮 #gfvip #teamspina https://t.co/Lywl3K9KvH	cesso	1	0
90036	@HSkelsen E poi li butti nel cesso.	cesso	0	0
90037	@gicarestik2 Beh detta da lui che è un cesso 😂😂😂😂😂😂😂😂😂😂😂😂😂😂	cesso	1	0
90038	Con il pianto abbiamo messo l'ultima spunta ai cliché dell'uomo cesso, ratto che tradisce tutte le donne della sua vita. #cepostaperte	cesso	1	0
90039	@RiccardoLuppino e tu moglie sta sotto terra, cesso blatta	cesso	1	1
90040	Eh niente, ti hanno battezzato con l’acqua del cesso	cesso	0	0
90041	Tafalso non perde occasione di denigrare Antonella. 38anni buttati nel cesso #Gfvip #donnalisi	cesso	0	0
90042	maria anche se provasse qualcosa non merita quel cesso al suo fianco #cepostaperte	cesso	1	0
90043	@AuGabriella3 @Mov5Stelle @Massimi07355017 @MicheleGubitosa Non sapevo che il cesso avesse bisogno dello scalda letto! A meno che il tuo letto non sia un cesso! 😂😂	cesso	0	0
90044	@AnacletoMitrag2 A me mi si intasa pure il cesso in continuazione.	cesso	0	0
90045	Quando si dice che gli opposti si attraggono LEI ICONICA LUI UN RATTO\nLEI BONA LUI UN CESSO\nLEI SLAY LUI SCAPPATO DI CASA #cepostaperte	cesso	1	0
90046	@TolliVincenzo Sono andati nel cesso	cesso	0	0
90047	Ah mo il cesso ratto si ricorda di lei .... #MareFuori3	cesso	1	0
90048	@uunformat È Daniele che è cesso stasera 🤣 per quello lo vediamo diverso Luca ⚰️	cesso	1	0
90049	@janavel7 @vfeltri Piuttosto mi lavo i denti con lo scopino del cesso	cesso	0	0
90050	@platonizd Edobau è un cesso enorme🤮	cesso	1	0
12001	https://t.co/81mg6AqT95\nLa civetta canta,\nle ordino di tacere,\nlei tace.\n\nIl mio lato oscuro prende il sopravvento.\nLe tenebre, ora, regnano in me.\nQui v'è solo ordine.\n\nLa civetta canta,\nle ordino di tacere,\nlei tace.\n\nHo chiesto al Grande Maestro,\nesaudisce ogni mio...	civetta	0	0
12002	@2Ftcrlqqf @3rnest3rnest7 Si e no,si era candidato al comune con lista civetta piddina,più che altro è una bimba di B&amp;B	civetta	0	0
12003	@UGiangrieco Don Mariano ne il giorno della civetta… bellissimo (nel film l’hanno annacquato ‘sti deficienti)	civetta	0	0
12004	@elenaborsa @a_ponchielli @MariuzzoAndrea @cristinamucciol @LoSlowpoke Si confonde: sono i suoi Maestri, le fonti che ho allegato a mescolare il tutto\nNon può operare in una bolla di vetro. Anzi, sappia che la "sua" biblioteca è strumentale all'altro "tipo": è un "prodotto civetta" che serve a tenere "nascoste" quelle arbitrariamente "non pubbliche"	civetta	0	0
12005	Cantus VIII - La civetta https://t.co/cf3bcFMLJz \nLa civetta canta,\nle ordino di tacere,\nlei tace.\n\nIl mio lato oscuro prende il sopravvento.\nLe tenebre, ora, regnano in me.\nQui v'è solo ordine....	civetta	0	0
12006	@CirottoAntonio aspetta una civetta che te la riporti	civetta	0	0
12007	@_Salvo_18 Ho perso la civetta vicino al Pandora, ed indovina? Non l'ho ancora trovata	civetta	0	0
12008	@BimbePeppe @SBidimedia Il "compagno" Cuperlo funge, come ai tempi di Civati, sempre da "civetta" per fottervi. Immancabile.	civetta	0	0
12009	Lascio qui una civetta tenerissima con problema neurologico (non vola e tiene la testa così) ma lei comunque super feliciona perché i falconieri l’hanno salvata e la accudiscono come un bambino, io innamorata al primo sguardo 🫠❤️ https://t.co/LUjS8ZRAQ2	civetta	0	0
12010	@salzheimer @terrasenzapane @Tatolina321 Il mio primo amore è stato così: non corrisposto e un po' crudele: una civetta.\nDa allora ho capito che non si chiama amore, ma infatuazione.\nE scappo subito se dà avvisaglie.\nAmori non corrisposti solo se ti chiami Petrarca e ti guadagni 7 secoli di fama nelle antologie.	civetta	0	0
12011	@isola_in Mmmmm.... Non lo so.... Se una donna fa la civetta difficilmente dite di no	civetta	1	1
12012	Signorotto7\nCra, Cra, Cra, è quel fagiano\nChe si sente un cormorano?\nCra, Cra, Cra, quella civetta, è una grande smorfiosetta\nCra, Cra, Cra, il grande gufo\nDella moglie è proprio stufo\nE per stare lì a gracchia re sempre intenta a ridà chiare\n,, da re inverno di Antonella	civetta	0	0
12013	@Lily91885479 @Mariagb3 @GrandeFratello E come mai questo video di cui parla il corriere non lo pubblicano.?\nTra quello che scrivono sui titoli e quello che poi c'è effettivamente scritto nell'articolo ci passa un abisso.\nSi chiamano Titoli civetta.	civetta	0	0
12014	Cipolla e Arte\nFelice Boselli e la Natura Morta\nDispensa con Ortaggi, Funghi, Selvaggina, Testa di Vitello e Civetta. 1690.\n\nhttps://t.co/DI4v5TBZNp https://t.co/MnwfD24anq	civetta	0	0
12015	Nikita è come è stata imitata da Milena l’avete vista in una puntata truccata di nero che sembrava mortisia? Ha uns risata da matrigna di Biancaneve quando si guarda allo specchio, e sussurra all’orecchio di Daniele paroline contro Oriana sembra la civetta sul comò. #gfvip	civetta	1	1
12016	Questa estate avevo sentito la civetta cantare, ora le conseguenze.	civetta	0	0
12017	@marcopirla 😂 posso sempre usare l'account civetta 👀	civetta	0	0
12018	Lei: misteriosa, implacabile, vendicativa; e bellissima\n\n ~L. Sciascia "Il giorno della civetta" https://t.co/OJYWoGx7Jc	civetta	0	0
12019	@lefrasidiosho "Aho', ma Medvedev e coso, come se chiama, ah, Peskov, quello che pare 'na civetta impagliata, ma dove li' mannamo?"\n- "Ahò, ma te lo devo proprio dì?"\n#Zelensky #Sanremo2023	civetta	0	0
12020	o Civetta!	civetta	0	0
12021	Ecco la piddina che assomiglia a una civetta sul trespolo.\nPoverina se stesse zitta si potrebbe anche guardare, invece non si può ne guardare ne ascoltare.	civetta	1	1
12022	1 euro con la civetta vale €1.440: ecco di quale parliamo https://t.co/XPJ4y9PGbs	civetta	0	0
12023	@liarhogws Cani, civetta, drago, coniglio e penso di non aver dimenticato nessuno	civetta	0	0
12024	ma ha senso “alla fine la civetta accende l’ira e ucc1de la cicala con un pugnale”…? mi sembra un pochino eccessivo	civetta	0	0
12025	Michelangelo Meraviglioso ! \nScultura allegorica sopra la tomba di Giuliano de’ Medici\nSi trova a Firenze in San Lorenzo Sacrestia Nuova\nSotto la gamba della #Notte è raffigurato un barbagianni, non una civetta ! https://t.co/sJ6XP9HjvB	civetta	0	0
12026	Che meraviglia la #ValdiZoldo innevata! Oggi andiamo alla Baita Civetta partendo da Pecol: una facile escursione su pista battuta da fare anche senza ciaspole. Prima di partire consulta il bollettino meteo e neve ⚠ \n\n❄️https://t.co/988NrcUDsU\n\n#VisitVeneto \n\n📸Foto @valdizoldo https://t.co/xwtvMLtyjF	civetta	0	0
12027	Vi capita mai di incontrare all'improvviso un animale selvatico? Una Poiana su un ramo, una volpe a bordo strada, un cinghiale, un riccio, una civetta... sono quegli incontri fugaci che mi rendono felice.	civetta	0	0
12028	Scappa con una gomma bucata, va contromano e sperona un’auto civetta: colpi di pistola all’Ikea per fermare il ricercato https://t.co/RA7VBwyx5M	civetta	0	0
12029	Dal Friuli scappa con una gomma bucata, va contromano e sperona un’auto civetta: colpi di pistola all’Ikea per fermare il ricercato: Un inseguimento partito da Gorizia che stava per terminare a Padova: l’uomo è riuscito a fuggire con i poliziotti che… https://t.co/VpxyCVspd7	civetta	0	0
12030	N. Gatta: "Esperienza straordinaria. Non era una "candidatura civetta" \nhttps://t.co/4Y23sCcCA1	civetta	0	0
12031	# il Piazzo di Biella #\n#Ristorante La Civetta #\n❤️ https://t.co/slWx3bfBdN	civetta	0	0
12032	@ricciomorbidoso Eh sì… e molte idee vengono presentate sapendo già che non potranno mai vedere la luce: è il così detto effetto richiamo, un po’ come i prodotti civetta…	civetta	0	0
12033	@AdrianaSpappa Si tenga per lei le sue esternazioni frottole da civetta. De gustibus non disputandum est.	civetta	1	1
12034	Elezioni Provincia di Foggia, l’ex presidente Nicola Gatta saluta e attacca la Lega: “Candidatura civetta” \nhttps://t.co/P7ndBIjQ32	civetta	0	0
12035	@GrandeFratello MA LA FATELA FORI STA CIVETTA , GALLINA SPAGNOLA !!	civetta	1	1
12036	@GinaJardines Civetta delle nevi. 😍😍😍	civetta	0	0
12037	@BroccoloGina @isabellarauti @GiorgiaMeloni Vero, però io sapevo che porta male sentir cantare la civetta	civetta	0	0
12038	@SrtoMila Ma come fa Daniele a cambiare idea su Oriana?Sta sempre attaccata come una cozza ad Onestini non capisce niente non so come fa a piacere una ragazza così Daniele gliel ha detto in tutte le salse che il suo comportamento non gli piace ma lei continua a fare la civetta	civetta	1	1
12039	@LucySpiller00 Quella è una civetta…	civetta	1	1
12040	@GrandeFratello Per fare nn la fate cantare sta civetta	civetta	1	1
12041	@fairytale10101 Ha ragione Edoardo fa’ la civetta con Andrea con la scusa dei piatti fletta con Andrea lava i piatti ride scherza gli mette le mani in faccia nn è in reggiseno lava tutti i piatti con Edoardo non faceva niente e lo lasciava solo	civetta	1	1
12042	“Tradito da Monti Dauni e candidatura civetta di Di Mauro”, lo sfogo di Gatta dopo la sconfitta a Palazzo Dogana https://t.co/tcskkVDplC	civetta	0	0
12043	#1 il giorno della civetta\n\nliterally took me una vita per finire questo libro uh i can see why è consigliato da tutte le professoresse di italiano e sono felice di averlo letto, let me just say non il libro più scorrevole che abbia mai letto https://t.co/XDV9Gg3ngL	civetta	0	0
12044	I loro sono Twitt civetta, provocano migliaia di risposre su argomenti costruiti per distrarre.\n\nAiutaci a rendere Twitter un posto migliore:\n\n#blocchiamoliNOI\n#facciamorete https://t.co/kzJWWjUlRj	civetta	0	0
12045	Sette Meno Uno (Il Cane, La Volpe, La Civetta, Il Fagiano, Il Cavallo, I... https://t.co/866GSa7Pwj via @YouTube	civetta	0	0
12046	@GiovaQuez Immagino che, per costui, "Il giorno della civetta" ( ad esempio) sia un fumetto di uccelli	civetta	0	0
12047	Sbadiglia Adele, la bianca civetta d'Islanda: vee EE BIAA TTTa AA vee.	civetta	0	0
12048	@DanieleRoveto Assomiglia ad una \ncivetta 😄	civetta	0	0
12049	Prima di Loretta la civetta e di Human Movement https://t.co/arES0UIWbw	civetta	0	0
12050	@SBruganelli Video dove civetta con gli uomini che io visto che con il sedere si strusciava a Andrea peggio di Oriana che era ubriaca edo la tolta in piu’ con la coperta Antonella era con le chiappe di fuori e tante strusciate non mettete i video di edo pure se sbaglia a respirare abbiamo	civetta	1	1
13001	@francesca_g09 salti da un cavolo all’altro che significa, che oriana è una contadina? ahahahah scusa ma quanti anni hai? non riesci a reggere una conversazione? comunque anche tu mi stai cacciando, non fare la bulla 😔	contadina	1	1
13002	@artdielle @fabianomas @LibriLonganesi @Basil_73 @HapCollins @Paolashap @danisetta @recerusse @raf_rob @TLarina1837 @Contornidinoir @laurapezzino Ho appena riletto “Le libere donne di Magliano” di Mario Tobino. Un tuffo in un’Italia contadina che non esiste più, un tocco magico nel toccare temi scabrosi come la follia e la segregazione.	contadina	0	0
13003	@Annalisafri Educazione. Se poi ad essere maleducato e’ una persona che ha cultura lo sono ancor di più . La saggezza contadina di una volta, quella dei miei nonni ad esempio, non necessitava della cultura per capire il rispetto …	contadina	0	0
13004	Dal Premio tecnico-scientifico a quello Letterario e Internazionale per sottolineare l'attualità della civiltà contadina,il passo è stato naturale.Grazie a un prodotto fino a ieri considerato povero,una distilleria di Grappa diviene una volta all’anno una capitale della cultura. https://t.co/TZYEbX534i	contadina	0	0
13005	@LaSignoraLupo Mai cambiato sempre stato così ma la classe contadina dell'epoca non se ne accorgeva come oggi i nuovi ignoranti magari pure con laurea delle merendine 🤣	contadina	0	0
13006	@KekkaW__ @Claudia73078744 Casualmente l’ordine restrittivo arriva quando Antonella è chiusa nella casa e non lo vede da mesi, non quando ancora stavano assieme.\nCasualità GIGANTE. Poi abbiamo già visto che suo padre è disposto a pagare pur di mandare avanti quella contadina si sua figlia #gfvip #spartani	contadina	1	1
13007	Léon Bonnat, "Una contadina egiziana e il suo bambino". https://t.co/IaFwsLZcE3	contadina	0	0
13008	@ylefsch La "colazione VERAMENTE tradizionale italiana", contadina: farinate varie con qualche avanzo della cena o formaggio, uova, pane e latte, (poco) salume d'inverno, e pan bagnato con pomodoro, condimento, vino, ricotta e (poco) marmellata o miele o avanzi della cena, d'estate, 🥰	contadina	0	0
13009	@EsmeraldaMori1 @stellainblack @MadameA02 Ma no. È anche un cesso. Intendiamoci, espone tutte le sue pessime ascendenze da contadina borgatara. Certo, non è la pupona della NATO, dai. È un cesso, e ce lo meritiamo. https://t.co/0OS5BOCYPv	contadina	1	0
13010	@rusembitaly con le loro famiglie.\n● La ribellione contadina di Tambov (1920-1921): ~ 240.000 ribelli e civili furono uccisi dalle forze comuniste. L'Armata Rossa ha usato armi chimiche per combattere i contadini.\nI dati degli archivi sovietici indicano che 2,4 milioni di Kulak furono	contadina	0	0
13011	Bologna: Il Museo della Civilt Contadina riapre al pubblico. Online il nuovo sito e un logo speciale per festeggiare i suoi 50 anni - https://t.co/Yx13SrcKlI... https://t.co/cHeqca4Tr7	contadina	0	0
13012	SONRISO\nPubblicità contadina... (ti prende per la gola) https://t.co/8yzEorlfr8	contadina	0	0
13013	io contadina poco apprezzata posso dire	contadina	0	0
13014	ma voi una contadina così ce l’avete bah https://t.co/xxqerZuPPR	contadina	0	0
13015	@systhemes @claudiocerasa Governo in agricoltura contadina vuol dire bottino	contadina	0	0
13016	@Cicci_Esmeralda Hola bellissima contadina😘😘😍	contadina	1	0
13017	✨𝐀𝐋𝐋𝐀 𝐒𝐂𝐎𝐏𝐄𝐑𝐓𝐀 𝐃𝐈 𝐕𝐈𝐋𝐋𝐄 𝐄 𝐂𝐀𝐒𝐓𝐄𝐋𝐋𝐈✨🗓 il 5 Febbraio 📌 #ExtraBo vi accompagna a #VillaSmeraldi, oggi sede del Museo della Civiltà Contadina Bentivoglio - che sorge all’interno di un parco storico all’inglese 🏰🌿https://t.co/6nK7TnnPVM @turismoER https://t.co/qNBpGLzk86	contadina	0	0
13018	@OnceUponATeddy Chiara classica contadina analfabeta che vive fuori dal mondo e quindi non può venire a sapere del libro del millennio	contadina	1	1
13019	@sfnnicita In versione contadina	contadina	0	0
13020	Fave e cicorie, un grande classico della tradizione contadina pugliese 😋\n\n#WeAreinPuglia #VieniamangiareinPuglia \n\n📸 @oggi_cucina_rosanna https://t.co/hKWAohtSMj	contadina	0	0
13021	Pasta e fagioli? Sì, ma con le cozze! Abbiamo arricchito questo piatto aggiungendo un po' di mare a una ricetta tipicamente contadina 👇Da leccarsi i baffi 😋 #LCIdal1929 #pastaefagioli #cozze https://t.co/OYple1kVk0	contadina	0	0
13022	Pallotte cacio e ova: la ricetta contadina che piace a tutti!\n https://t.co/G1CCfzjmQD #03Febbraio #Ricette #Pallottecacioeova #Pallottecacioeuova https://t.co/j95moEBmXQ	contadina	0	0
13023	guardiani del campo, guardiani del suolo … guardiani feriti CREMONA. MUSEO DELLA CIVILTA' CONTADINA. Un’installazione ed un video dell’artista Angelo Reccagni a Cremon , al Cambonino - Museo della civiltà contadina. Guardiani feriti… https://t.co/BzxAqO4SUD	contadina	0	0
13024	guardiani del campo, guardiani del suolo … guardiani feriti CREMONA. MUSEO DELLA CIVILTA' CONTADINA. Un’installazione ed un video dell’artista Angelo Reccagni a Cremon , al Cambonino - Museo della civiltà contadina. Guardiani feriti… https://t.co/ERDnNxzqBf	contadina	0	0
13025	Sono un naturista di nascita .\nVengo da una cultura contadina di generazioni .\nLa Natura è il miglior maestro che \nl' uomo possa avere. https://t.co/xB3P7m1VyR	contadina	0	0
13026	https://t.co/SL2tl0VWgx #Ricette e #Cucina italiana\nLa storia della vignarola: la ricetta contadina degli antichi Romani https://t.co/esedNECQcl	contadina	0	0
13027	non capisco perché tanto odio per la skin di ayaka, sembra una contadina love her	contadina	0	0
13028	#Febbraio in "Les Très Riches Heures du Duc de Berry"\nQuesta miniatura, eseguita tra il 1438 e il 1442 da un pittore anonimo alla corte di Carlo VIl, è, a differenza di quella di gennaio, dedicata alla durezza della vita contadina in inverno. https://t.co/54eQffES54	contadina	0	0
13029	Il Museo della Civiltà Contadina ad Art City 2023 #emiliaromagna https://t.co/Opipcw0NaP https://t.co/K542u4w98y	contadina	0	0
13030	GENERALE DIETRO LA COLLINA\nCI STA LA NOTTE BUIA ED ASSASSINA \nE IN MEZZO AL PRATO C’È UNA CONTADINA\nCURVA SUL TRAMONTO SEMBRA UNA BAMBINA https://t.co/SGQqdPBuEc https://t.co/ZfujbNQYMd	contadina	0	0
13031	Il profumo e gusto della tradizione contadina pugliese 🥰\n\n🌹PURE DI FAVE con VERDURE DI CAMPAGNA (Cicureddhre, Spruscini, Zanguni e Bietola)🌹\n\nPER VEDERE LA VIDEO RICETTA,\nCLICCA SUL LINK: 👇\n➜ https://t.co/FyGxiqfeEI\n\n#2febbraio #Food #RecipeOfTheDay #puglia #Italian #Foodie https://t.co/zy9UGpBzKB	contadina	0	0
13032	Ora come allora.\n\nInfo scatto\nSony a7iii + Sony 90mm\n1/160 90mm f4 ISO 400\nLuce naturale\n\n#abruzzo #pastore #contadina @ Vasto Marina https://t.co/8645MFwIJJ	contadina	0	0
13033	Conti alla contadina, forse in 10 al prezzo attuale 🤣	contadina	0	0
13034	Torgiano: centenario Rina Gatti, una camminata tra le pagine della scrittrice contadina. L'iniziativa domenica 5 febbraio\nhttps://t.co/V2f0XKNUkd https://t.co/I3cGAEuPAv	contadina	0	0
13035	🔔 Il "Giorno della Candelora": perché può predire la fine dell'inverno\nIl 2 febbraio è la festa della Candelora, che deriva da antichi riti pagani, e nella tradizione contadina può rappresentare la fine dell’inverno\nhttps://t.co/qIbP6bSh3o	contadina	0	0
13036	#Buongiorno ☀️🌞 \nOggi, #2febbraio la #Candelora. Una festa che ha radici nella tradizione contadina e in quella religiosa. Come dice il proverbio: “Se c’è sole a Candelora dell’inverno sèmo fora, ma se piove o tira vento, nell’inverno sèmo dentro".	contadina	0	0
13037	#curiosità: il giorno della #candelora si celebra il #2febbraio e cade esattamente 40 giorni dopo Natale. Nella tradizione contadina, invece, è importante per i raccolti: si crede infatti che le condizioni meteo di questa giornata indichino l'inizio...\n\nhttps://t.co/93mfkgzLPZ	contadina	0	0
13038	Secondo una vecchia tradizione dopo i gelidi giorni della Merla arriva la Candelora, festività che, sebbene sia religiosa, è molto legata a credenze popolari di origine contadina, dove questo giorno è particolarmente sentito.\n#2febbraio #candelora https://t.co/8GXNr8zPMA	contadina	0	0
13039	#ArtePerLArte BG👩\n@albertopetro2 \n@GaiaGaudenzi \n@migliaccio31 \n@RitangelaPrivi1 \n@claudioborlotto \n@JohnDante_\n@Petra71301259 \n@angelicadisogno \n@Sensibilia8 \n@RamellaUgo\n@karmendida\n@PaolaToogoodxme \n@Rebeka80721106 \n@arteeblog \n@EnricoCastrovil\n🎨Ubaldo Oppi\nGiovane contadina https://t.co/070JwSqOnP	contadina	1	0
13040	AGEVOLAZIONE PROPRIETA' CONTADINA - Decadenza se il fondo viene affittato https://t.co/SlnuUxak4C	contadina	0	0
13041	@rosy1992011 @VittoriaDP_ Esatto… su ig ho trovato questa traduzione… ecco perché Seyran è impazzita… già stava su di giri…nessuno si mette sulla mia strada come una contadina…ma io altro che tirare i capelli… le avevo fatto lo scalpo e con quello ci avevo soffocato ferit	contadina	1	1
13042	@rosy1992011 @VittoriaDP_ Eh vabbè ma guarda quelli sopra…Pelin stasera ha gettato la maschera… le ha dato della contadina…sono gli altri che surclassano Sultan di troppo	contadina	1	0
13043	Contadina a chi??? Sei tutte noi Seyran!!🤣🤣🤣🤣 #YaliCapkini https://t.co/xdbxdedutN	contadina	1	0
13044	@dassste Sarà che sono stata una contadina e ho avuto le galline 🤣🤣🤣	contadina	0	0
13045	La nuova #agricoltura contadina. Incontro con Giannozzo Pucci il 3 febbraio a #Siena nella sede di Officina Solidale https://t.co/PvPN2x7EC7	contadina	0	0
13046	@il_misantropo Questa cosa dei piatti vintage non l'ho mai capita, proprio ora che ritorna alla ribalta la vecchia cucina contadina. 🤔	contadina	0	0
13047	Nuovi eroi, vecchi ipocriti.\n\nQuesta signora, nella foto, non sapeva di essere un esempio di eroismo, di coerenza e di coraggio. Era semplicemente una contadina che vendeva i suoi prodotti su un 'barocio' tirato da una cavalla, cento anni fa.\n\nIl suo nome era Carmela ⬇️ https://t.co/JiwEpochir	contadina	0	0
13048	contro l'Italia beota, ignorante, contadina, disattende perfino il punto organizzativo, scivolando nella macchietta di sé stesso, fra 'militi' che ...tirano a campare e deliranti invasati completamente avulsi dal reale.Chi si salva? Probabilmente chi fugge, pare suggerire Grilli.	contadina	0	0
13049	È il piatto forte di un ristorante di Albano. Loro sul menù la chiamano "contadina". La gente sembra apprezzarla moltissimo.\nLe parole so' importanti. https://t.co/nlk45Jh9PN	contadina	0	0
13050	@MARI151280 @lanenacolmuso Tipica contadina. \nD'altronde le mie origini sono quelle. E mi pento di non aver voluto (o mi dispiace che mio padre non mi abbia spinto a) lavorare un po' più in campagna da ragazzo. \nPenso che la mia percezione della campagna e della natura sarebbe più empatica, ora.	contadina	0	0
14001	#palombelli ha chiesto nulla alla Meloni su Donzelli/Del Mastro? Non credo proprio. Da sempre rete4 è la rete cortigiana dei governi della destra.	cortigiana	0	0
14002	@Rosa86299368 Provalo x l atteggiamento della tua beniamina, invece \nCosa ci sarebbe di disgustoso??? che beva lo han visto tutti, che abbia una comportamento da cortigiana pure\nLa verità fa male, rassegnati carissima	cortigiana	1	0
14003	@repubblica Perché secondo Repubblica gli imprenditori davano retta allo scoreeggione e alla cortigiana, chiedo eh?	cortigiana	1	0
14004	@CarloMossa A te che fosti la più contesa la cortigiana che non si dà a tutti ed ora all'angolo di quella chiesa offri le immagini ai belli ed ai brutti lascio le note di questa canzone canto il dolore della tua illusione a te che sei per tirare avanti costretta a vendere Cristo e i santi.	cortigiana	0	0
14005	@AnnalisaChirico @Cartabiancarai3 @RaiTre Ma,in quanto "giornalista",non ti crea alcun imbarazzo sentirti così a tuo agio nel ruolo della cortigiana? (Per cortigiana intendo persona vicina ai reali incapace,per convenienza,di alcun atteggiamento critico: assolutamente niente altro.)	cortigiana	0	0
14006	@PattyPeixinha @NemesiTua @TreizeJeanne Eh sì proprio così faccio, ci conosciamo no? Pensi di insultarmi chiamandomi cortigiana o ancella? Divertiti ✨	cortigiana	1	0
14007	@berlusconi Comincia a far sparire la cortigiana Ronzulli dall'orizzonte...	cortigiana	1	0
14008	@HoaraBorselli Come mai fai delle figuracce così plateali? Forse perché sei una cortigiana della destra razzista e devi sfornare contenuti divisivi e rancorosi anche quando è palese che non ne sai una piccia?	cortigiana	1	0
14009	@Carlaluna71 @_soleilandia_ Bassa "cortigiana" direi	cortigiana	0	0
14010	sistema feudale colorito superficialmente dallo sfarzo di una società cortigiana e corrotta. Avevano terrore della diffusione delle idee ed avevano cercato di mantenere i loro sudditi al di fuori delle rivoluzioni agricola e industriale dell'Europa settentrionale.	cortigiana	0	0
14011	@TrashAddicted Certo che Nikita ha una calma esagerata. Io già da due mesi avrei rotto la faccia al buffone e alla cortigiana con la bottiglia.	cortigiana	1	1
14012	Lei diventa la best giovane cortigiana da compagnia dopo Momo e per fortuna la bff poraccia diventa la cuoca ufficiale per queste damigelle perché di talento per fare la cortigiana non ce l'aveva.	cortigiana	1	0
14013	@simolar1984 Cara cortigiana dello Zar, lei è in errore. https://t.co/C5FRjysJqI	cortigiana	0	0
14014	@gb_dostobaby Disse la cortigiana di Putin.	cortigiana	0	0
14015	@Astreavera @teamsoleilsorge Meglio strega che cortigiana 🤫\nPrrrrrrrr\n#gfvip	cortigiana	1	0
14016	@Zarathu20322327 Infatti, #daniele si è reso conto di non potere oltrepassare il limite della decenza x lui giustamente importante\nÈ stato evidente che la cortigiana, complice con autori e pelato, insiste nel trascinarlo in una parte non sua,lui non ci sta, e fa benissimo\n@GrandeFratello 🤡#gfvip	cortigiana	0	0
14017	la capo arpie GIAELE, empatia e umanità SCARSISSIME, la responsabile di esasperazioni di rapporti,con i suoi riportini esagerati solo per seminare zizzania, ora cortigiana del fake..dà il peggio. #GFVIP https://t.co/nVw49b2Vq9	cortigiana	0	0
14018	Non capisco di che gavetta parla visto che si trova nei programmi a fare il giullare di corte della cortigiana di turno. Non vedo in lui nessun talento. È il tipico ospite di #BuonaDomenica di Costanzo seduto al tavolo con i piatti. Nota negativa è che Buona Domenica non c'è più https://t.co/9WTa9gFzyX	cortigiana	0	0
14019	💃La ballerina e cortigiana esotica olandese #MataHari è stata arrestata all'Hotel Elysée Palace di Parigi per spionaggio\n\n#13febbraio 1917 https://t.co/FH6GuFjV2u	cortigiana	0	0
14020	Se ci fossimo vegognati un minimo di una UE cortigiana degli USA la guerra Ucraina avrebbe dovuto servire a fare subito la Federazione. Invece. Invece ha indotto a prostrarsi ancora più seguendo i suoi sovranisti.	cortigiana	0	0
14021	@MariucciA89 Il merdone che non é ossessionato da #nikita\n🤣🤣🤣🤣🤣🤣🤣.\nFUORI la cortigiana e il suo protettore\n#gfvip	cortigiana	1	1
14022	@ritadallachiesa @PBerizzi La verità è che se lei parla seriamente (non da cortigiana) , allora sta esprimendo una totale e sconsolante ignoranza sulla dinamica delle indagini di questo tipo.	cortigiana	1	0
14023	@asimpleblackcat @Seghinho3 Un fellatio, cortigiana	cortigiana	1	1
14024	@Nius22380501 @letiziamoratti Come ho scritto, è un cortigiana e bagascia quella meggera sfondata e sfondrata.	cortigiana	1	1
14025	@AndreaSALIERI1 @AndreaSALIERI6 Una Venezia composta, come un’anziana signora aristocratica dagli abiti un po’ fané. Quella Venezia oggi è turpemente abbigliata come una vecchia cortigiana, pronta a vendersi allo straniero. Che triste declino.	cortigiana	1	0
14026	Vogliamo parlare della Stampa italiana, sempre servile, inchinata, adulatoria e cortigiana ...\nNessuno si è permesso di poter lontanamente prevedere una notizia del genere.\nIl "Giornalismo" sportivo italiano è definitivamente scomparso	cortigiana	0	0
14027	@CarloCalenda Questa lettera messaggio si autodistruggera fra 4 3 2 1 bang! LE cazzate fanno sto rumore,Calenda te lo sei inventato, nessuno t scrive xke sei solo l ennesima cortigiana di Silvio. Con tutti i deputati.Ha 8miliardi di euro e vi fa scopare tutti nelle sue residenze	cortigiana	1	0
14028	#intervisteimpossibili\nEsther Lachmann\nLa Païva\nDonna misteriosa dotata di una personalità magnetica.\nAssetata di denaro si sposa 3 volte,\ncambiando 4 religioni e città.\nHa avuto diversi amanti ed è stata la più famosa cortigiana del XIX secolo\n\nLEGGI SU:\nhttps://t.co/L2uMKGBegy https://t.co/7IFS6Xcrrq	cortigiana	0	0
14029	@signori_massimo @madforfree Mah... la Ronzulli per la sua ignoranza e le sue esperienze di cortigiana alla corte berlusconiana nn è paragonabile alla Arden... La Arden è una stronza intelligente! Lei ronzatrice di corte è una stronza ignorante!!	cortigiana	0	0
14030	Vittimella tutto solo per la cortigiana di oriana luca onestini mestierante orco di tavassi fate vsnire da vomitare #gfvip	cortigiana	1	0
14031	@InesGiochi Io non supporto Antonella ma questa ignorante cortigiana alcolizzata è ripugnante\nQueste intensi show fatti solo spalleggiata dal suo pappone ratto\n@alfosignorini 😉chi scrive questi miseri e mediocri copioni? la sua impronta è unica🤫\n#gfvip7 #GFvip #fuorioriana\n#fuorionestini	cortigiana	1	1
14032	@jamfive_ @EhmYana Cortesemente, “cortigiana di Putin” dillo alla fregna d chi te muort	cortigiana	0	0
14033	troia, puttana, zoccola, baldracca ,battona ,bagascia, mignotta, prostituta lucciola , malafemmina , donna dai facili costumi, meretrice , cagna ,sgualdrina,scrofa, squillo, cortigiana,mercenaria	cortigiana	1	1
14034	@sottonella5 troia, zoccola, puttana, baldracca, donna dai facili costumi, battona, donna con le gambe aperte h24, vacca, maiala, donna di strada, prostituta, donnaccia, donnina allegra, cagna, cortigiana, mignotta, bagascia, buona donna, meretrice, sgualdrina, ragazza squillo, malafemmina	cortigiana	1	1
14035	Ripensandoci, avrei potuto fare la "Cortigiana onesta"	cortigiana	0	0
14036	@arielge8 Infatti ho criticato il linguaggio, però se le donne che si sentono emancipate e lavorano poi vogliono pagata ogni sera la cena meglio andare con una cortigiana	cortigiana	1	1
14037	Sono svenuto dall'emozione, scusatemi ma ora devo andare a prendere nella mia cassaforte super segreta i nastri de La Cortigiana.\n\nCanale5, una rete felice https://t.co/TGKQwhTrZ6	cortigiana	0	0
14038	@SimoPillon per "propaganda gender" intendi i tuoi desideri inconfessabili che trasferisci su altri e sui quali fondi il tuo personaggino da cortigiana?	cortigiana	1	1
14039	@MarcoRizzoPC @sntfrc Lo intervista pure il promo Vespa 🐝 e lo annuncia con una fregola cortigiana che va oltre ogni decenza.	cortigiana	0	0
14040	@ygwhitettisba @RealZenoCosini @Saintro_piez E poi ti regalano una cortigiana per ogni tifoso dell’Inter… fanta mercato?	cortigiana	0	0
14041	@VadymVietrov Trovo più parlante la sua maschera da cortigiana d'alto bordo. https://t.co/9Y302lEFRE	cortigiana	0	0
14042	@Edda_luciano69 È un po' un mistero, Fornarina perché figlia di un Fornaio. Che fosse una cortigiana può darsi.	cortigiana	0	0
14043	@Seghinho3 Come si dice nel gergo classico, mi sego, siccome non ho ancora trovato una cortigiana in grado di soddisfarmi	cortigiana	0	0
14044	#intervisteimpossibili\nAngela Greca\nLa Cortigiana nella Roma dei Papi\nProveniva da Lanciano, da dove\nera stata "rubata" durante una fiera\nper spingerla sulla via della\nprostituzione nella città dei papi\n\nLEGGI SU:\nhttps://t.co/UqgPt4L4Yu\n\n#giallo #MUSE \n#cortigiane #vintage https://t.co/ACMVlBABuN	cortigiana	0	0
14045	appena danno a bebè il ruolo di cortigiana io ve lo giuro non so come reagisco 💀	cortigiana	0	0
14046	Oriana più che una Reina me ricorda na cortigiana #gfvip #donnalisi	cortigiana	1	1
14047	#GIALLOPASSIONE\nLa Laura di Giorgione\nSposa o cortigiana?\nChi è quella donna dallo sguardo\nimpenetrabile? La Laura amata dal\nPetrarca? La ninfa Dafne amata da\nApollo? \n\nLEGGI L'ARTICOLO SU\nhttps://t.co/FYZh2L0ksl\n\n#PASSIONE #amanti #modelle \n#arte \n #MISTERI #storia #pittura https://t.co/vLGFfHPiNN	cortigiana	0	0
14048	@GiovaQuez Ma quando la mandano in rottamazione questa cortigiana di Silvio ? Sono veci …	cortigiana	0	0
14049	@dobledouble le cose che hanno fatto incazzare dana non sono le parole di niki che non ha detto niente di che, ma il fatto che oriana sia andata a svegliarla, secondo che se gli occhiali erano di luca preferiva glieli chiedesse lui e non la cortigiana con la quale non parla.. #gfvip	cortigiana	1	0
14050	fake va a cagare!! niki ha solo detto che spesso ori li indossa..il problema è che la cortigiana l'ha svegliata per questo... CAZZO C'ENTRA NIKITA... perchè deve parlare di gravità di cose dette da niki CON TUTTA LA CASA #gfvip	cortigiana	1	0
15001	@StanPedr0 Assolutamente d’accordo Micol, NON si scappa dalla PROPRIA NATURA! La vs NATURA… esser così viscide ed infime.\nMicol il suo viso angelico cozza con la sua anima nera.\nOri, sa che non può fare altro se nn mostrare il suo corpo,e lo fa h24!\nPENA x VOI.\n#nikiters #denzzzers #fiorde	cozza	0	0
15002	Niente Oriana è attaccata come na cozza a Daniele non lo molla neanche nei giochi. Non gli fa avvicinare nessun’altra e le loro amiche che la spalleggiano. Mamma mia che poveraccia sta messa malissimo 😂😂😂 #denzzzers #gfvip https://t.co/EpZRnCd0nM	cozza	1	0
15003	@MaynardBrownRih E ha fatto bene pareva na cozza	cozza	1	1
15004	Sta cozza come si è attaccata #oriele	cozza	1	0
15005	Forse “Sarai tarantina” era un modo carino per non darle della cozza…\n #cepostaperte https://t.co/vQUUW9YPlU	cozza	1	0
15006	Nel senso di una cozza tarantina?\n#cepostaperte	cozza	0	0
15007	Persino ratto parrucchiere applaude. Invece Cozza blu era di GHIACCIO #oriele https://t.co/8swpDhIgZi	cozza	0	0
15008	Daniele stasera è una cozza.\n#oriele https://t.co/PutjXnoqQy	cozza	1	0
15009	Io l'ho visto che prima Bebè ci è rimasta male perché Sarah difendeva Antonella... Lo sapevo che lei e cozza blu in questi giorni sono riuscite ad allontanarla da Bebè perché lei sta un pò di più con le OMG e con Daniele #oriele	cozza	0	0
15010	@paolo_caciolli Non cozza zoccola.	cozza	0	1
15011	@sonolaros Ma questa è peggio di una cozza.	cozza	1	0
15012	Oriana cozza!\n\n#oriana #GFvip https://t.co/NOeevwb4OG	cozza	1	0
15013	Abbiamo di nuovo Daniele versione cozza stasera, fa morire che l'hanno cacciato tutte dalla stanza 🤣 #oriele	cozza	1	0
15014	SCOLLATI O TI SPACCO LA FACCIA SPECIE DI COZZA DI MERDA, ATTACCATI AD ALTRO NON A LUI CIAO	cozza	1	1
15015	Lui che ritorna in modalità cozza adoro tanto #oriele	cozza	1	0
15016	DANIELE MODALITÀ COZZA, AMO MOLTISSIMO AHAHHAHAH #oriele	cozza	1	0
15017	La versione Daniele cozza con Oriana è la mia versione preferita e spero duri per sempre #oriele	cozza	1	0
15018	Carino oggi lui cozza 😭#oriele	cozza	1	0
15019	@oct2610 ma che vuoi piu' dire a questa patetica cozza venuta male,neanche nuda fa effetto x quanto è storta e secca,sembra la befana,non se po guardà,è penosa	cozza	1	1
15020	🤡🤬 una cozza🤮 #Gfvip #nikiters https://t.co/41cid1qcdj	cozza	1	1
15021	@SalvatoreCordu2 @flavialins25 Porcellina io sono pronto quando vuoi ti apro come una cozza a pelle mmmmm🤤🤤🤤mi piacerebbe sentirti in dm 🔥🔥🔥	cozza	0	1
15022	@danicla85 Appena la cozza della Murgia è al televoto deve tornare a casa con percentuali bulgare, ma poi #Oriana come fa a fidarsi ancora di lei?🤷‍♀️#GFvip #Oriele @GiuliaSalemi93 @alfosignorini	cozza	1	1
15023	@HungryMarcio No José fallo aprire in due come una cozza che po esse che lo leva	cozza	0	0
15024	E comunque… dal discorso che ha fatto prima Daniele con la cozza Oriana sopra di lui, devo dire che sono sempre più convinta del fatto che a lui piaccia solo fisicamente. Non lo vedo preso e nemmeno si fa prendere in giro, anzi, è lui a percularla\n\n#gfvip #denzzzers #nikiters	cozza	1	0
15025	oriana super cozza non me lo aspettavo #gfvip #oriele #orianistas #donnalisi #gintonic #incorvassi #nikiters https://t.co/iTeOvODlEX	cozza	1	0
15026	oriana super cozza non me lo aspettavo \n#gfvip	cozza	1	0
15027	@danicla85 Asfaltata la cozza che non si stacca da Daniele	cozza	1	1
15028	Bella questa Oriana stile cozza dietro al culo di Daniele 24h 🥱 #gfvip https://t.co/2VaeFNggH5	cozza	1	0
15029	@_vivx_ Io non vedo l’ora entri anche l’ex di Daniele (deve entrare vero?) \nOriana deve svegliarsi, passerà per cozza	cozza	1	0
15030	@sonoingenua_ Daniele era una cozza con loro,,,,	cozza	1	0
15031	@serperuta Cn gli incorvassi è ok ma cn noi oriele no, a ori le dice ke Daniele ci prova cn lei ad esempio, oppure si avvicina a cozza,quando ori e dani Sn litigati, oppure dice ad Oriana ancora di Luca ke stanno bene insieme x allontanarla, si capisce ke nn sia proprio limpidissimo cn lei	cozza	1	0
15032	Che cozza, questa. È imbarazzante... Grazie a Dio al mondo ci sono anche donne con un cervello, oltre a quelle con solo le tette. #gfvip #nikiters #denzzzers #GFvip	cozza	1	1
15033	@Affoga @AndreaOrlandosp Ma puoi dire quello che vuoi ..il 41 bis cozza cona costituzione..poi la puoi pensare come vuoi	cozza	1	0
15034	#Donnalisi comunque povero Edo ,non può dormire neanche tranquillamente🤣 Anto versione cozza🤣	cozza	1	0
15035	migol è una cozza ,,,,,,,,,,,,,,,	cozza	1	1
15036	Lo dico? Lo dico: è lui che le fa credere più di quello che c'è.\nLo sa cosa pensa cozza blu perché gliel'ha detto Luca e anche Bebè però continua sempre ad accarezzarla e a darle falsa speranze. Se poi c'è altro sotto, peggio mi sento #oriele https://t.co/DbMYPqQGc5	cozza	0	0
15037	@liliaragnar Il lavaggio delle cozze si effettua, a richiesta, in Grecia. Se rinasco, spero di essere cozza viaggerò di più.	cozza	0	0
15038	Sta cozza non vedeva l’ora 🧚 #oriele	cozza	1	0
15039	@radiosilvana @PaolaPC116 @clamar65 Vuoi la verità? Sei solo come un cane e sinceramente mi dispiace, ma non puoi attaccarti a me come una cozza solo perché ti senti solo. \nOooooh, finalmente l'ho detto. \nLa verità fa male.	cozza	0	0
15040	@andrea5788 @ing_michele Tesi che cozza nettamente con le scelte che tendenzialmente fa Mourinho, che ha sempre schierato i giocatori più pronti. Thairovic, come Felix prima, vengono schierati solo come gesto di protesta verso la dirigenza, e per dimostrare che ha ragione riguardo la rosa corta.	cozza	0	0
15041	@therealsharol Non dimentichiamoci che gli autori spingono tanto e ci sono le prove. lei cmq non lo mollerà più. Ma poi non vedo che lei è una cozza attaccata in poche parole. spero che quando arrivi martina si stacchi oriana ma ne dubito, comincerà a parlare male facendo la vittima abbandonata	cozza	1	0
15042	Una cozza attaccata agli scogli in questo caso attaccata in un altro posto…😂😂. Poi dicono che è sempre Daniele quello pesante. 🤡😂 #gfvip #denzzzers https://t.co/jG6MNhxwoU	cozza	1	1
15043	@AbdulahadHanan si una cozza…! lo stavo per scrivere 😂😂 a quanto vedo la pensiamo tutti uguale.	cozza	1	0
15044	@pashqual @afiresign_ Chi è attaccata come una cozza mentre lui le dice basta di lasciarlo???	cozza	1	0
15045	Mannaggia alla cozza 😭😭 https://t.co/GmDy6VNpQq	cozza	0	0
15046	@afiresign_ Sembra una in cerca del pisello.. si attacca come una cozza…. Un po’ di dignità nn le guasterebbe. Si dovrebbe fare desiderare ….	cozza	1	1
15047	@pameladiverona Una volta a Roma per definire persone così, si diceva : è proprio na cozza!!🤣🤣	cozza	1	1
15048	@Flydown01377531 Vabbè ma lui è amico di Antonella? Quello che dice lui cozza completamente con quello che dice Antonella ogni volta che parla dell'ex anche quando è arrabbiata	cozza	0	0
15049	Gli oriele non possono farci il favore di dire a qualche cozza a caso che è ridicola anche da parte nostra? \nChiedo per un'amica \n#Gintonic https://t.co/Eu6OJoeaYc	cozza	1	1
15050	@michelle_ginino Madonna mia che cozza questa!!	cozza	1	1
22100	#elettradeianna una femminista , donna straordinaria sempre impegnata con passione e competenza nelle battaglie politiche ci mancherà https://t.co/3W3GxlGkq5	femminista	0	0
22101	Wow erica la più grande femminista della nostra generazione, applausi👏🏻👏🏻👏🏻 https://t.co/xUlyPdfl9q	femminista	0	0
22102	finalmente qualcuno che smerda la fake femminista https://t.co/h02v3tAQan	femminista	1	1
22103	@annachiara_dm E sei sicura che alimentare ed esaltare questo tipo di scelta, ergendola a modello di emancipazione femminile, sia il modo corretto per promuovere l’ideologia femminista? Secondo me sono più le controindicazioni che i vantaggi	femminista	0	0
22104	@hyunlixbabies esprimete. Ma cadete perennemente in contraddizione con voi stesse, non ottenendo nulla e incattivendovi pure chi sta sulla vostra stessa barca (prima di beccarmi accuse di mansplaining: sono un uomo che ha vissuto da donna per tanto tempo e un militante femminista)	femminista	0	0
22105	no vabbè questo mega drama contro la fake femminista, io voglio essere nutrita, anita parla con me❤️	femminista	1	1
22106	@wwgxia @giorgiasdrafts essere d’accordo con il discorso che le ragazze di un fandom, ammesso che siano tutte eterosessuali, lo sostengono solo perché è bello è sicuramente un discorso da femminista!!	femminista	0	0
22107	@xo_a0 @giorgiasdrafts cose che una femminista direbbe sicuramente!!!	femminista	1	0
22108	@TwittGiorgio Questa è progressista e femminista ! Perché la difendi Giorgio ?	femminista	1	1
22109	@lillog71 Non sono femminista ma è il mio stesso pensiero. Mai desiderato figli🤷‍♀️ e secondo me è l’unica e sola ragione per la quale li si dovrebbe mettere al mondo.	femminista	0	0
22110	@id0ntlikemilk comunque, non ti definire femminista, visto che probabilmente odi pure tuo nonno, padre, zio, cugino e chiunque sia un uomo nella tua famiglia	femminista	0	0
22111	@TonyTheMajor Ascolta lei è frustrata non è femminista. Le femministe sono per l’auto determinazione della donna e se una ragazza decide di farsi foto su only fans può benissimo farlo	femminista	0	0
22112	@valkeasusi @GuyTotti Un Tinder con una CEO che è una femminista frustrata, ma per qualche motivo il parco utenti è migliore	femminista	1	1
22113	È morta l'ex parlamentare e femminista #ElettraDeiana all'età di 82 anni. Il segretario nazionale di Sinistra Italiana,Nicola Fratoianni: "Una grande perdita per me e per tante e tanti che hanno camminato con lei". \nhttps://t.co/TLDJjgS4pk	femminista	0	0
22114	@V4nessa_M4rquez Nezifemminista lo vai a dire a tua madre! Poi chi ti credi di essere! E doveva essere un insulto avrete più tempo per intrecciarsi i peli delle ascelle a vicenda! Perché se tanto ci tieni a saperlo io non sono né femminista né sono contro la depilazione🤣	femminista	0	0
22115	@putinianvairus @VinnyA350 @disinforrnatico @ggiadamar @P_per_Pandistan 🤣🤣🤣\nMoggo il tuider Italia grazie allo status di poeta femminista.\nMagari fosse così cara GIVLIA 🤣	femminista	0	0
22116	per tutelare i loro interessi spesso facendo leva sul senso di colpa. Tipo se osi criticare le tesi strampalate di una femminista figlia di un notaio e di una farmacista con la villa in Costa Azzurra e l’attico city life questa invariabilmente 🔽🔽🔽🔽	femminista	1	1
22117	una femminista non mi faccio problemi ad irriderla pubblicamente davanti a tutti e a fare battute salaci ed offensive. Io ho rispetto per tutti tranne che per due categorie di persone: 1. Paraculi che cercano di spacciarti per giusto e scientifico un pensiero fatto su misura 🔽🔽	femminista	1	1
22118	@Giovanni_Esse @Pitagurus98 @ggiadamar Vedi, mio caro Giovanni...talvolta noi donne necessitiamo un principe azzurro che sappia ammaliarci con il coraggio delle sue emozioni. Data la tua fama da poeta femminista, mi aspettavo che l'avessi capito...	femminista	0	0
22119	@Giovanni_Esse La femminista più bella che intelligente..ma questo già si sapeva 😂😂😂\nLa nasona la chiamo io 😈😈😈\nMamma mia quanto e brutta la cavalla nasona	femminista	1	1
22120	Arrivata ora la notizia della morte di Elettra Deiana, femminista, studiosa, parlamentare. Ecco la sua voce che racconta #SibillaAleramo , autrice molto amata da Elettra.\n‘Sibilla Aleramo raccontata da Elettra Deiana’ by Monica Lanfranco is on #SoundCloud https://t.co/w28lVxYrO6	femminista	0	0
22121	Ogni volta che incontro @theeumans mi sento un po' a casa. Un percorso comune verso un'Europa femminista, ecologista, democratica, libera e unita https://t.co/1uXegBQ95n	femminista	0	0
22122	@brunotrenchi @marioadinolfi Quello dei "diritti delle donne" è un vecchio cliché femminista errato. In realtà l' #aborto schiavizza le donne e le rende infelici per sempre.	femminista	0	1
22123	@PQuerela ci manca l'uomo che pensa di dirci chi sta facendo qualcosa e chi no dall'alto dei suoi privilegi (immagina credere che la boldrini sia femminista 😂)	femminista	0	0
22124	Il suo compito era semplice - in teoria, spazzare via le ultime migliaia di uomini che si erano rifugiati nelle Highlands scozzesi." 😱\n\nSembra il sogno erotico di ogni femminista. 2/2	femminista	1	0
22125	Questa maglietta non entrerà mai nel mio guardaroba.\n"Ecco come appare una femminista". 🤔\n📸Web https://t.co/K7YJINvT8Z	femminista	0	0
22126	Una dirigente della sinistra e un’intellettuale femminista. Ha contributo a scrivere la storia dell'impegno per i diritti delle donne e la pace. Mancherà a tutte e tutti noi. Addio #ElettraDeiana. https://t.co/vNyZ19dyJT	femminista	0	0
22127	@imantartide @bettassad so che cerchi attenzioni da me ma al momento le sto riservando solo a marti la wicked femminista aka la mia nuova fiamma	femminista	0	0
22128	@artvworld E tu saresti femminista con sto commento? Ahahahahahahahahahahahahahhaahhahahahahahaahahahahahhahaahah	femminista	0	0
22129	@LeonardoCaciopp @moro_thomas @odiodiclasse2 Ma guarda, i compagni italiani erano in larga parte pure misogini, per dire. Chiedilo a chi militava nel movimento femminista negli anni sessanta/settanta. Sicché. Di che dobbiamo parla’? \nDuemilaventitre da un mese abbondante.\nMagari st’orologio rimettiamolo sull’ora giusta	femminista	0	0
22130	Una donna che mi ha insegnato tanto: con la sua generosità, intelligenza, cura per le relazioni umane, determinazione nelle analisi e nelle idee che sapeva condividere. Una femminista, una comunista.\nCiao Elettra, ti voglio e ti vogliamo bene.	femminista	0	0
22131	@styrene777 Infatti non è osé, è solo tristemente kitsch ed inguardabile. Adesso si tira fuori la carta della retorica femminista e del rispetto - lei che non sa alcunché né dell’una né dell’altro - solo perché, per l’ennesima volta, non si accettano le critiche? Ma lol	femminista	0	0
22132	Tipologia 38. Il russofobo femminista neonazista. E' quello che non tollera che a capo della Russia non ci sia una ragazza del WEF, una con parenti nazisti e nemmeno una la cui carriera e' stata rubata al porno.	femminista	0	0
22133	@TizianaFerrario Ha detto bene, "polemiche", perchè di FATTI non ce n'erano!\nLe sue parole denotano una conoscenza degli Alpini e delle cultura locale di quella gente degna della sezione femminista di un centro sociale.\n(Anche "molestie" in maiuscolo evidenzia che ha notevoli problemi in merito).	femminista	1	0
22134	Stanotte #ElettraDeiana ci ha lasciati. Una dirigente comunista, un’intellettuale femminista, una compagna e un’amica. https://t.co/tC5O8B1qSg	femminista	0	0
22135	#Elettra Deiana se n’è andata. Una donna straordinaria che mi ha insegnato tantissimo. Il movimento femminista le deve molto e la sua passione, il suo impegno, la sua cultura, la sua innata eleganza, non smetteranno mai di essere un esempio. Gli sia lieve la terra	femminista	0	0
22136	ho fatto la femminista genderina ai campionati di filosofia pozz pur murì	femminista	1	1
22137	@sunshinee90001 @_vivx_ io non nego il sessismo di antonella, giudico solo l’ipocrisia di pesare ogni cosa che fa 10 volte tanto rispetto agli altri, altrimenti edobau sarebbe già cancelled e la morale ad antonella quando l’esempio è l’icona femminista che ha dato della zoccola a dana beh… che dire…	femminista	0	0
22138	@ilducarocco Sono donna non Femminista.	femminista	1	0
22139	@giuntialdunque il problema è chi lo erge a fenomeno femminista che proprio non è 💀 però ripeto, ci sono canzoni davvero problematiche che vengono glorificate da anni da troppe persone (vedi bella stronza di marco masini che è proprio inquietante)	femminista	0	0
22140	@Simona03567380 @GrandeFratello Questa si chiama ipocrisia femminista 😂🤡	femminista	1	0
22141	@lauraboldrini @ellyesse Ma vai a cagare femminista a fasi alterne, tu la solidarietà non sai neanche cos'è e la fai a chi conviene a te odiosa	femminista	1	1
22142	Marta Lempart l’ leader del movimento femminista polacco per la legalizzazione dell’aborto nel suo paese invece di darmi il suo materiale propagandistico mi ha regalato la spilleretta che dice all’ucraina” siamo con voi https://t.co/Yf4EfqidMT	femminista	0	0
22143	Ci ha lasciato stanotte #ElettraDeiana donna di sinistra, Femminista,impegnata prima a Milano poi a Roma per tanti anni. Ex parlamentare di #RifondazioneComunista e poi di #SinistraItaliana. Io con lei e altre avevo in comune da 13 anni il #GruppoFemminista del Mercoledì.🍀🌺😌	femminista	0	0
22144	@contezzascalza Un’altra femminista che non conosce le gioie della “patata”\n(po caridadi)	femminista	1	1
22145	"La sola genuina speranza di una liberazione femminista risiede in una prospettiva di cambiamento sociale che tenga in considerazione il modo in cui i sistemi interconnessi di classismo, razzismo e sessismo funzionano insieme" https://t.co/S11FerDruZ	femminista	0	0
22146	@fanpage Cos’è questa nuova moda del piagnisteo nazi-femminista?	femminista	1	1
22147	@intheoldground vandA edizioni! mi sembra di capire sia una casa editrice indipendente femminista, nel caso dello scum sono state le prime a tradurre la versione originale e integrale del manifesto (che fu manomesso quando la Solanas andò in prigione)	femminista	0	0
22148	@Almgh99 Rispetto il tuo pensiero, ma ovviamente non lo condivido. \nIo non sono femminista, semplicemente sono una donna che - in quanto donna - ha vissuto sulla propria pelle la "colpa" di essere tale. Questo, a causa di una cultura religioso-patriarcale, che ha relegato la donna in una	femminista	0	0
22149	questi erano i film che guardavo e i miei si chiedono come mai sono così femminista https://t.co/JWJzYdmo0y	femminista	0	0
23110	@max1ci6 Quanto mi fa incazzare sta roba ragazzi... Ma tanto\nLa società è andata davvero nella fogna. Altro che sedia elettrica, le mazzate fino all'ultimo respiro.\nE non perché sia omofobo, ma perché è si spinge a tutti i costi verso la depravazione e contro natura	fogna	0	0
23111	@8PapaveriRossi5 Per esattezza Fioravanti 25 di carcere e 6 di semi libertà vigilata.\n\nPer quanto mi riguarda una fogna umana quanto Costipo.	fogna	1	0
23112	non invidio per niente chi sarà a san siro in mezzo ai topi di fogna domani	fogna	0	0
23113	@SimoPillon Torna nella fogna Merda!!	fogna	1	0
23114	@adriandelmonte La fogna a cielo aperto della foto descrive bene questo derby.	fogna	0	0
23115	Adesso questi due coglioni mettiamoli in uno scroto resistente.\nMaledetti topi di fogna.\n#fascisti #topi #merda https://t.co/OLXjJP7YyU	fogna	0	0
23116	@Oche1989 tu palesemente una di quelle persone che la davano per finita e si sente offesa per "in culo ai topi di fogna", curati l'ossessione e sparisci	fogna	0	0
23117	@culumtibi @Misurelli77 Sciacquati la bocca fogna	fogna	1	1
23118	@SecolodItalia1 LA FOGNA MELONI DICE AI RANDELLATORI FASCILEGHISTI DI NON PARTECIPARE ALLA FOGNA CREATA, DAI FASCILEGHISTI.COME UNA MIGNOTTA CHE FA UN CORSO INTENSIVO DI BUCCHINI CAMERATESCHI SOLO USANDO PRESERVATIVI CON OMOLOGAZIONE NAZIFASCISTA!	fogna	1	1
23119	@Luciauri31 @mimettoadormire Mi sembravi te scappata dalla fogna.	fogna	1	0
23120	@Willi_Shake_02 @Lulu_larossa So di diversi medici reintegrati che non riescono più a guardare in faccia i loro colleghi allineati. La fogna dovrà aprirsi prima o poi.	fogna	0	0
23121	@Dania mediocrita' insostenibile \nmanierismo\nipocrisia\nsciatto come un bidone di spazzatura\novviamente politicamente corretto\nun'ottima prova del livello fogna della cinematografia italiana\n\n#siccita'	fogna	0	0
23122	@gicarestik2 non mi sembra un topo di fogna il ragazzo…certi commenti proprio…vorrei vedere la faccia vostra mentre digitate certe cose, chissà che ci esce 😂	fogna	0	0
23123	COMPA’ CHIUR QUELLA FOGNA #CePostaPerTe	fogna	1	0
23124	@vocedelpatriota MI DEVE SCUSARE SE STAMATTINA ANDANDO AL CESSO NON LE HO LASCIATO I 05€ SCUSI. PERÒ LA PROSSIMA VOLTA PULISCA BENE IL CESSO PERCHÉ L'ULTIMA VOLTA HO TROVATO TANTA GASPARRI E LA FORZA ITALIA ERA STROTOLATA SU TUTTO IL PAVIMENTO ZUPPO DI FOGNA MELONI!	fogna	0	0
23125	@GiuseppeConteIT Sento una gran puzza di fogna!	fogna	0	0
23126	@Noiconsalvini CHIURTRINDOCESS FOGNA FASCISTA TUMORE MALIGNO D'ITALIA FAMMI UN POMPINO CON LE ORECCHIE DEL PROVOLINO DI FROCELLI D'ITALIA!	fogna	1	0
23127	@HartreeFock @AutogriLLocryp @fabio_tab @alekava @michele_geraci Appunto la fogna è l'occidente	fogna	0	0
23128	@13mari81 È una fogna	fogna	1	1
23129	@matteosalvinimi CHIURTRINDOCESS FOGNA FASCISTA LEGHISTA LECCAMERDA TUMORE MALIGNO D'ITALIA CHIAVTNUCAZZMMOCC E NU CAZZ NIR RIND E PACC!	fogna	0	0
23130	@AutogriLLocryp @fabio_tab @HartreeFock @alekava @michele_geraci A chiacchiere lo puoi dire. Ma a dimostrarlo certo non lo puoi. L'occidente è una fogna	fogna	0	0
23131	@afiresign_ Tontonella un topo di fogna punto non la sopporto proprio	fogna	1	1
23132	Il delirio. È veramente tempo di chiudere con questa fogna a cielo aperto del calcio. https://t.co/CKvkO19p67	fogna	0	0
23133	@baffi_francesco l'@ODG_CNOG andrebbe sciolto!\n\n@Libero_official è la fogna della #disinformazione del fascio-leghista #Angelucci il ras delle cliniche private.\nLa vergogna del @ComuneMarino!	fogna	0	0
23134	Disse quello della tifoseria che ha qualche giorno fa accerchiato https://t.co/X5zaBWl9gO stessa tifoseria che interruppe un https://t.co/Dm4sL8VFa8 stessa tifoseria che prima di una partita ha ucciso un tifoso napoletano in un vero agguato.\nChiudi quella fogna https://t.co/lJwycmSOcR	fogna	0	0
23135	@jaandersonnn tappati quella fogna	fogna	1	0
23136	@Raffaele_Galar Fanno parte della stessa fogna	fogna	0	0
23137	@BelpietroTweet Una fogna a cielo aperto è Saviano	fogna	0	0
23138	@StefanoFeltri FOGNA MELONI VUOLE RIABILITARE LA FOGNA DA CUI PROVIENE. IN FUTURO CI FARÀ APPARIRE I CAMPI DI CONCENTRAMENTO COME STUFE A GAS CHE SERVONO PER RISCALDARE IL POPOLO E IL MASSACRO DEI MIGRANTI NEL MEDITERRIANO COME CIMITERO 2.0. PER LIBERARE SPAZI PRODUTTIVI PER I NAZIPRIVATI .	fogna	1	1
23139	@mimettoadormire Che poi, trattandosi di TV fogna, ci sta. Quello che mi fa specie, è che loro non se ne schifino. Pare de sta' in UK	fogna	0	0
23140	@SimoPillon O hai un utero o chiudi quella fogna che hai su quella faccia di merda	fogna	1	0
23141	@fogna_la VAFFANCULO. non fai ridere nessuno.	fogna	0	0
23142	@TommasoFoti @Corriere FOGNA MELONI DIFENDE I LECCAMERDA PER COPRIRE IL BUCO DEL CULO DI UN GOVERNO DI INCOMPETENTI SORRETTO DA INTERESSI NAZIFASCIMAFIOSI!	fogna	1	1
23143	@incognivalse Costruiscimi una casa e chiudi quella fogna	fogna	1	0
23144	@francescacuore6 si senza ombra di dubbio "fogna "	fogna	0	0
23145	è sempre il momento giusto per ricordare quando un anno dopo le olimpiadi di rio federica pellegrini tornò sul gradino più alto fottendo ledecky e mckeon che si facevano la guerra ed in culo ai topi di fogna che la davano per finita\n\n#CePostaPerTe\nhttps://t.co/Es13tCGrig	fogna	0	0
23146	@GianlucaStream @sergioalesi @SecolodItalia1 Livello top dei ratti di fogna fascisti	fogna	0	0
23147	Ci credo che in quella casa ci sono i topi non puliscono sembra che abitano in una fogna #GFvip	fogna	0	0
23148	@TommasoFoti @Corriere FOGNA FASCISTA TUMORE MALIGNO D'ITALIA DA ORA IN POI QUANDO VADO A CACARE NEL BUCO DEL CESSO ATTACCHERO' LA TUA FACCIA. MESSAGGIO AGLI ITALIANI ANTI NAZIFASCILEGHISMO:FATE STAMPARE LA FACCIA DI FOGNA DI QUESTI PERSONAGGI DEL PASSATO CONDANNATI DALLA STORIA COSTITUZIONALE. ZUCA.	fogna	1	1
23149	@fdiviterbo CHIURTRINDOCESS E CHIAVTNUCAZZMMOCC E NU CAZZNCUL FOGNA FASCISTA TUMORE MALIGNO D'ITALIA!	fogna	1	1
23150	@Gobba90665216 Ciao .dopo segnalazione twitter mi ha confermato blocco per il topaccio di fogna...👍	fogna	0	0
23151	@FratellidItalia LA FOGNA. FASCISTA,CHE INCOLPA GLI ANARCHICI DI FARE MINACCE FASCISTE E POI INCOLPA LE ALTRE FORZE POLITICHE! ANDATE A FARE 4BUCCHINI,CON E SENZA ORECCHIE! SIETE MERDA CHE SPUTA MERDA. FOGNA ! CHE CERCA DI RIPULIRSI SPRUZZANDO MEFITICHE PATACCHE DI SCIORDA SU TUTTA L'ITALIA	fogna	1	0
23152	@hyveR02 Il. Gioco marcio di un presentatore marcio con autori marci e top del top un opinionista ratta di fogna	fogna	1	1
23153	@a_meluzzi Il posto giusto, per la fogna	fogna	1	1
23154	Premetto che il PD è una fogna a cielo aperto!\nTanto premesso, dico che questo è un titolo da DELINQUENTI!!! https://t.co/fMyUsbeldC	fogna	0	0
23155	#inonda Il primo partito d'Italia x Giannini è pieno di topi di fogna...	fogna	0	0
23156	@itsmeback_ Noi non siamo normali ,abbiamo scarti di fogna chiamati piddini .	fogna	1	0
23157	@FrancoLocatell6 @TolliVincenzo E tu da quale fogna sei venuto fuori?	fogna	0	0
23158	Cmq, i #cinghiali, nun invadono i centri urbani pe' rompe' er cazzo a noi.\nSemo stati noi a rompe' er cazzo a loro!\nPoi, perché #Roma è diventata 'na fogna a cielo aperto, annate a chiederlo ar sindaco 👻 fantasma (#gualtieri), che c'ha le mani in pasta... https://t.co/xS4fpz4jOL	fogna	0	0
23159	I canadesi , nella fogna , devo gettare quel criminale di @JustinTrudeau con i porci del #naziWEF ! https://t.co/xnuPZJITz2	fogna	0	0
16001	@_mrdm è nato prima l'uovo o la gallina	gallina	0	0
16002	@magicaGrmente22 @Micioantani @fdragoni Per gallina parla di sua madre di se o di sua sorella? Immagino di si.	gallina	1	1
16003	@DomPer888 Certo che questa ha trovato la gallina dalle uova d’oro	gallina	0	0
16004	Diciamo che quell’anno le co-conduttrici non fecero questi grandi sforzi per discostarsi dallo stereotipo della valletta vuota e a tratti anche un po’ gallina. #ceraunavoltailfestival	gallina	1	1
16005	@ImolaOggi È solo una marionetta, schiava e serva dello stato profondo che deve portare avanti l'agenda del caxxo che gli è stata imposta. Una gallina a cui è stata mozzata la testa.	gallina	1	1
16006	@enjoysile Ma è normale! Sono cervelli di gallina aizzati dal $istema contro chi si permette di esprimere una sua opinione: si credono rivoluzionari, ma sono pecore	gallina	0	0
16007	@Stefano_roca @petergomezblog @fattoquotidiano hai torto\nil gallo canta ma è alla gallina Alias che brucia il culo	gallina	0	0
16008	@Corriere La gallina padovana starnazza a più non posso !	gallina	0	0
16009	@perrolargirucho Una gallina cani	gallina	0	0
16010	Quando iniziano col video in cui lui ha bocca a culo di gallina e le Carrera nelle foto io chiuderei a prescindere senza manco farlo parlare #cepostaperte	gallina	0	0
16011	Jlo e la sua gallina domestica #taliequali https://t.co/vXutaQTYpq	gallina	0	0
16012	@cardillo74 Si vede, c'è l'hai tu il cervello ......... da gallina.	gallina	0	0
16013	Ma Nikita che fa la bocca culo di gallina a Daniele #oriele	gallina	1	0
16014	Una gallina è più intelligente di lei sicuro. #gfvip https://t.co/eytCo6jADV	gallina	1	1
16015	@Focus_it Considerato che la discendenza degli uccelli e' dai dinosauri...e he l gallina non e' formalmene un dinosauro.... UOVO	gallina	0	0
16016	@romannncin che gallina...	gallina	1	1
16017	Antonella ti prego non ci cascare lascia perdere questa gallina\n#gfvip #donnalisi	gallina	1	1
16018	@puertcruz La bruganelli ha molta + classe di quella gallina della pertinelli e anche + fascinosa e bella!!!	gallina	1	1
16019	#controcorrente risposta ad hoc del senatore Foti alla gallina dei cinquestelle	gallina	1	1
16020	@EsercitoCrucian @Donzelli Siamo seri. La #Cucchi è una analfabeta disfunzionale ( qualcuno la capisce quando parla?) una gallina. Ovvio sia eterodiretta da quella melma di????	gallina	1	1
16021	@matt7gh stì trollazzi…… sono sparsi ovunque, come gli sghitti di gallina in un pollaio….. 😤	gallina	0	0
16022	@AlessiaMorani Chetati gallina	gallina	1	1
16023	@LeParoleRai3 @MaxGramel @RVecchioni @BotteriGiovanna @JacopoVeneziani @saverioraimondo @luisellacost @IaconaRiccardo @rosy_bindi @RaiTre Di fondo si sente ridere sguatamente.. È la stessa gallina di Che tempo che fa?	gallina	1	1
16024	@RosiPolimeni Nemmeno ioooo e neanche Can con il papillon e la gallina della Gerini che canta!!	gallina	0	0
16025	@vfeltri ...a me sembra una gallina spennacchiata...	gallina	1	1
16026	Una gallina vecchia …che fa le uova con le rughe!!! 🤣🤣🤣🤡🤡🤡 https://t.co/ZUmZIPy004	gallina	1	0
16027	@Turiddu_1 @HSkelsen Se pensi a covid , guerra e protagonisti , sento odore di gallina strinata sul fuoco	gallina	0	0
16028	@CarloCalenda Ma basta... Appropriate o no, ma cosa c'entra??? È normale che 4 esponenti PD siano andati a trovare uno sottoposto al 41 bis che ha deciso di lasciarsi morire di fame? Se è al 41 bis non è che ha rubato na' gallina... Sennò tutti scioperano e tutti fuori dalle carceri. Basta!	gallina	0	0
16029	@SicilianoSum gallina vecchia e rancida sempre buon brodo...	gallina	1	1
16030	@confundustria Hae! Questa e' stata sempre e' solo na gran gnocca,! Ma ha sempre avuto un cervello di gallina! ( Senza offese per le galline che almeno loro fanno uova buonissime!!!!)	gallina	0	0
16031	non jeonghan che fa il verso della gallina, lui non è reale https://t.co/brTpAK8IH2	gallina	0	0
16032	Oriana gallina starnazzante\n\n#oriana #GFvip https://t.co/TM5E1dFmhP	gallina	1	1
16033	@vonderleyen @ZelenskaUA La gallina dalle uova di oro. X le sue tasche è del marito!	gallina	1	0
16034	@Libero_official La gallina ancora razzola?	gallina	1	1
16035	@migrante8 Tra nazisti e comunisti chi è peggio? Mah... è come dire se viene prima l'uovo o la gallina	gallina	0	0
16036	@Steriga_ @fdragoni Ottimo intervento Fabio. Peccato che la gallina conduttrice starnazzando ha dato fastidio a te(ma anche a bassetti)	gallina	1	1
16037	@AleAle81961303 @FabioInnocent10 Ma no è il classico complottaro che ha trovato nella Russia l'ennesima gallina dalle uova d'ora per rincoglionire gli analfabeti funzionali	gallina	0	0
16038	@___Anna22 ..GALLINA CHE NON BECCA HA GIÀ BECCATO. E X ESPERIENZA https://t.co/4X1mjaT7To FAME TI RENDE UNA BESTIA! SFONDI LE PORTE DELLE CASE PER MANGIARE.	gallina	0	0
16039	@elvialorena50 @marioadinolfi Scoperto che solo sé un soggetto osserva le particelle queste hanno interazione tra loro, l'uovo e la gallina, altrimenti no...siamo noi i creatori di tutto.	gallina	0	0
16040	@elvialorena50 @marioadinolfi .. più semplice, sé c'è un uovo è perché la gallina l'ha fatta nascere,giusto?\nVerrebbe da dire di sì,invece non è così.\nLa fisica dice che c'è l'uovo e la gallina solo sé una forma intelligente la concepisce,in fisica quantistica che si adentra nel determinismo hanno	gallina	0	0
16041	@narchia3 l’uovo e la gallina	gallina	0	0
16042	@Micioantani @Favoletta1982 @fdragoni Praticamente non sa che cosa sia il covid.\nLa gallina.	gallina	1	1
16043	@harrybrentit Ma per me può mangiare anche la merda di gallina, purché non rompa le palle	gallina	0	0
16044	@repubblica Siete voi i primi che dovete abbassare i toni, specialmente Donzelli con quella voce da gallina spennacchiata.	gallina	1	0
16045	@Rosalba_Falzone così le foto a culo di gallina vengono meglio	gallina	0	0
16046	@BinMatteoSalam @ZephirineD @death_from_a_ly @mariagrazia103 @AndreaCoppola5 @alecattelan @Fedez Pensa che nemmeno conoscevo questo episodio da tanto mi frega di uno e dell’altra… però ho sentito un’intervista a Fedez e sono convinta anch’io che non sia un pirla, anzi; ma finisce lì, non sono una fan e anche per questo mi hanno molto infastidito i tuoi “idiota” e “gallina”	gallina	1	0
16047	@lucacimini82 Ecco perché ho sempre odiato sportivamente parlando i prescritti.Hanno l’intelligenza di una gallina	gallina	0	0
16048	@Trovalotu_ Tipo è nato prima l’uovo o la gallina	gallina	0	0
16049	@Aldo__1926 La gallina è diventato Gallo	gallina	0	0
16050	@SicilianoSum Si sa che gallina vecchia fa buon brodo 😂	gallina	0	0
29001	VINTAGE - AVORIO DI BOND ST - SETA GREZZA - BORSA DIPINTA A MANO - OTTIMO COND\nhttps://t.co/QUOVEXJx2E	grezza	0	0
29002	@MadameA02 Vabbè non esageriamo. Per essere eleganti ci vuole portamento, presenza, stile. E la tipa non ha nessuno dei 3. Resta una grezza con dei vestiti belli. Ma sempre grezza è.	grezza	1	1
29003	@LulManuel1 @nikita_mylove @alessxia__ Già sei grezza perché concludi conteso a gente sconosciuta comunque dimmi cosa fanno gli altri la dovete criticare anche perché respira se vuoi citare una nullafacente e abbiamo Micol che è la principessa Gioele che è la regina e Tavassi che non alza un dito	grezza	1	1
29004	Comunque il glow-up fatto da simona giordano, la ragazza fidanzata col tipo di 42 anni o di 42 anni più di lei, non si è capito. Super grezza prima, chic e con roba costosa addosso adesso. Quindi io due domande me le farei	grezza	1	1
29005	@Libero_official siete disarmanti... però con una approssimazione così grezza (donzelli o cospito)... evitate qualsiasi contraddirorio... vi piace buttarla in caciara...	grezza	0	0
29006	@fattoquotidiano Solita grezza propaganda per i tanti boccaloni. Gli Ucraini sono famosi per le loro capacità mistificatorie e ammaliatrici. Le loro donne ne sono uno strumento perfetto….	grezza	0	0
29007	@reieetto dobbiamo ridere? che grezza /o e sfigata/o sei? fatti una trombata ogni tanto che più salutare invece di scrivere stronzate!	grezza	1	1
29008	Dreadwolf ha raggiunto la fase "alpha": ogni componente realizzata è stata messa insieme a formare una versione grezza del gioco completo.\nAnche se alcuni rumor ipotizzavano il 2023 come anno d'uscita, non è mai stato annunciata ufficialmente una finestra di lancio.\n\n#DragonAge https://t.co/H4PcyXyRiX	grezza	0	0
29009	Google aggrega i dati in forma grezza e dai primi risultati salta subito agli occhi che qualcuno ha assegnato un punteggio elevatissimo (10) al Tpl di Roma. In realtà analogo risultato ricorre per TUTTI i mezzi di trasporto, ECCETTO i taxi.\n\nRisultato genuino?\n\n2/ https://t.co/53U64xQd47	grezza	0	0
29010	McEli.\n Qua non si scherza mica.\nPero qui é il fascísmo, "PATRIOTAS" gente grezza che sono l'opposizione,e fanno schifo \nTutti ladri !!!\nAdukterato,manipulato https://t.co/nBnQMyoLw3	grezza	0	0
29011	#gintonic quanto è grezza comunque la murgia nei movimenti nel modo di fare .	grezza	1	1
29012	@JessicaBerti10 Ma la gente tesse la la grezza è la stessa . Non capite nemmeno il senso.	grezza	0	0
29013	@bericomelius Se trallallero. La seta non è lana grezza	grezza	0	0
29014	va be' ma rispetto alla versione grezza che avevo ricevuto dal capo milanese a giugno (credo), l'ho rimpinguata sia negli Allegati, sia nel riferimento alle normative internazionali, sia con Tabelle ecc\n\npoi c'è tutta la parte piping bulk che è un mondo a parte da aggiungere	grezza	0	0
29015	@CarloCalenda È un’ opposizione davvero feroce e determinata! Complimenti! Proprio quello che ci vuole con questa destra becera grezza e incompetente! Continuate così e ci troveremo per 20 anni l’Italia governata da sti deficienti	grezza	0	0
29016	@carovana12 Nemmeno! È una destra becera e grezza! Dobbiamo stare molto attenti!	grezza	0	0
29017	Anche se può far male riflettere sui pensieri da cui ci si è distratti durante il giorno, l'atto di farlo è fondamentalmente la vostra forma più vera, la vostra forma più grezza.	grezza	0	0
29018	I nostri tavoli sono realizzati con la pietra lavica dell'Etna ceramizzati e dipinti a mano. La prima cottura grezza purifica la pietra a circa 1000 gradi mentre la seconda cottura sempre ad altissime temperature fissa i colori atossici sul…... https://t.co/f9aDyx06ue	grezza	0	0
29019	@impenetrabilee Grezza nel senso di più soda non coi grumi	grezza	0	0
29020	Locatelli critica Sara perché fa la polenta con i grumi e non va bene perché troppo grezza. Però gli alpini la volevano grezza. Rega di #skyuno meno male che lo avete montato voi #MasterChefIt	grezza	0	0
29021	@Annalaiser Non la seguo piú da almeno un anno. Non mi piace e forse mai piaciuta. Un'arricchita, grezza ed arrogante come tante	grezza	1	1
29022	@BITCHYFit Grezza fino all'ultimo 🤮🤮🤮🤮	grezza	1	1
29023	@Morckina Ma scherzi . Già la coop ha dei prezzi ...vedo dipendenti della coop fare spesa in altri supermarket. Pensa,io compro una farina di grano antico piantato senza diserbo,o altre tipologie di chimico. E grezza,non propio bianca,ed ha una levitazione mostruosa. La pago €1,80.	grezza	0	0
29024	@gigi52335676 No, grezza è e grezza rimarrà. Come parlare correttamente l’italiano lo si impara alle elementari, non a 50 anni	grezza	1	1
29025	Sex Pistols - Never Mind The Bollocks, Here’s The Sex Pistols (1977)\nhttps://t.co/aaH9d3j3GY\n\nIl nuovo post di essebi è su https://t.co/mQrskZMeJy\n\nL'album ha influenzato molte band e musicisti e l'industria in generale. In particolare, l'energia grezza dell'album, la consegna …	grezza	0	0
29026	@isotta_m Ho della lana grezza, stesso tipo, color naturale per un effetto tipo coperte militari vintage.	grezza	0	0
29027	@AMikAlice @pierspollon @serenabortone Spero di no la Bortone. É cosi grezza. Parla solo lei, non sa cantare, non sa ballare. Non va a tempo nemmeno quando applaue. Fai la radio Bortone. O impara da mignolo.	grezza	1	1
29028	@DanielPrince_00 Se fosse così non berrebbe il vino per la festa di Antonino. È grezza e basta.	grezza	1	1
29029	@seta_grezza @initlabor Anche nei cosmetici non scherza 😉	grezza	0	0
29030	@BITCHYFit Assolutamente no!!!! Donnalisi po grezza di uomo!!! Falso e bugiardo cronico!!! 🤮🤮🤮🤮	grezza	0	0
29031	Finisco ribadendo il discorso che questa è una spiegazione molto, molto, molto grezza, banalizzata e semplicistica. È ancora un discorso estremamente complesso anche per me, ci torniamo su meglio tra un annetto. 😇	grezza	0	0
29032	@Nibbionero @Montecitorio Più che i presunti simbolici massonici a far storcere il naso furono: \n- la grafica grezza;\n- i colori (con relative tonalità) non definiti; \n- l'accostamento caotico di simboli, senza riguardi per le regole araldiche sul tema;\n- la compresenza nella corona di alloro e ulivo;	grezza	0	0
29033	Secondo l'ultima rilevazione dell'Istituto Nazionale di Statistica spagnolo, le vendite al dettaglio hanno registrato una crescita del 4% su base annua.\n\nLa serie grezza (non destagionalizzata) registra un aumento pari allo 3,5% sull'anno precedente.\n\nhttps://t.co/YVNocDSkKP https://t.co/MSdP6puMp0	grezza	0	0
29034	@MikeAnblips era un vecchio sketch ricorrente in The Fast Show. Lui ricco proprietario e il suo fattore. Il ricco è educato, accento posh, ma non sa un cacchio di niente e subisce il fascino di Ted, rozzo, con la parlata grezza che invece si intende di campi e che ha (forse) un phd a Eton.	grezza	0	0
29035	@bagnotrash Tu stai male… non per Edoardo, ma per i BUUUUU che hai ricevuto per essere stata scoperta come FALSAAAA e amica di SONIA B, falsa e grezza come te. Ma per caso è il tuo agente ?	grezza	1	1
29036	@tvstellare Quanto sei grezza Sonia, anche se fai la saputella	grezza	1	1
29037	#GFVip #SONIABRUGANELLI che si sente strafaiga con quel cappello 🤣🤣🤣🤣🤣🤣🤣\n\nPer quel quel cappello ci vuole classe ed eleganza.....\nPuò avere tutto i soldi che vuole per la borsa figa e il cappello Chic...sempre grezza e cafona resta! Cammina come un camionista	grezza	1	1
29038	@AnnalisaChirico @Controcorrente @rete4 Annalisa cooperazione non predatoria in Nord Africa? Conosco nei dettagli la politica attuata, quindi risparmia non a me ma agli italiani questa grezza propaganda fascista che il ventennio è finito nel 45 in un distributore di benzina a Milano.	grezza	0	0
29039	Sonia Bruganelli oltre le baggianate che dici, non sei nemmeno in grado di parlare con calma, sei grezza aggressiva e spari a zero mentre dovresti cercare di pesare bene le parole#gfvip	grezza	1	1
29040	@ziofalba Ok un po' grezza ma ben piazzata nel contesto	grezza	1	0
29041	@ciccifritto @nonsonoCristina Eh devo attrezzarmi con calzini più pesanti x forza… solo che poi non mi entrano le scarpe 😅 e tra l’altro lana troppo grezza mi pizzica da morireee	grezza	0	0
29042	@AnaisAnaisse @nonsonoCristina Quanto ti capisco 😩 In questi giorni indosso i calzettoni in lana grezza che ho comprato in Lapponia. Sono inguardabile ma almeno ho i piedi bollenti 😅	grezza	0	0
29043	Tonty che va ad accaparrarsi il solito posto senza nemmeno notare che è vestita color divano 🤦🏽‍♀️🤦🏽‍♀️🤦🏽‍♀️🤦🏽‍♀️ mamma mia che grezza #gfvip #incorvassi #oriele #thepisis #onestini	grezza	1	1
29044	Un articolo scientifico a firma dei dottori Stipa e Vanacore rivela come l’«acqua grezza» usata sui campi di #calcio può causare il Morbo\n#Sla https://t.co/szQXBZPKGU	grezza	0	0
29045	@alefitpiu Ridicola, volgare, grezza, esteticamente irrilevante.	grezza	1	1
29046	Ritengo Oriana decisamente grezza, volgare, insopportabile… ma è sincera: non si nasconde, si mostra esattamente com’è, a differenza di un Tavassi o di un Onestini. \nLoro si nascondono dietro una facciata di bravi ragazzi. Due strateghi senza remore #gfvip #nikiters #dakita https://t.co/bscqUA7ct8	grezza	1	1
29047	@DigerossRoss Quanto è grezza!	grezza	1	1
29048	Mi dispiace ma anche vestita da regina risulta grezza, volgare ...🤮🤮🤮#gfvip https://t.co/gYM5giHZ2d	grezza	1	1
29049	puoi essere piena di soldi e pure laureata ma se sei grezza si vede😬	grezza	1	1
29050	@juventusfans Grande Spalletti...raffinatissima risposta alla ben nota e grezza, nonché ridicola arroganza "allegrina"	grezza	0	0
17001	@CucchiRiccardo Dottore, il problema è che LEI STESSA non si accetta! Infatti usa una PARRUCCA! ODIA addirittura i suoi capelli CRESPI! Ha persino finto di essere LESBICA! E' un PRODOTTO INVENTATO! E ne è consapevole! \nNOI NON SIAMO RAZZISTI, NON LO SIAMO MAI STATI! Sono loro che ci ODIANO!	lesbica	0	0
17002	@_GrayDorian E quando ti ritrovi la nebra o gialla od a pois o purtroppo bianca ma almeno lesbica ed ignorante a decidere della tua salute è SCIENZAH ! Se non è autoparodia è un kojone!	lesbica	0	0
17003	e io questa volta le dirò sì sono lesbica dai però superiamola	lesbica	0	0
17004	buonanotte la vita come la conosciamo non sarà più la stessa quando domani mattina andrò a rewatchare everything everywhere all at once con mia madre che mi dirà l'ennesima frase sul fatto che non devo avere paura di dirle che sono lesbica lei mi vuole bene a prescindere	lesbica	0	0
17005	@Dayne999 Intanto,visto che è dichiaratamente lesbica,dovrebbe spiegare come farebbe ad avere un bambino senza l'aiutino di un maschietto o del suo semino!Con solo metà dell'apparato riproduttivo a disposizione non ci fa granché.Certo lo può sempre "comprare"e può anche scegliere il colore	lesbica	0	1
17006	@auromanca lesbica ti ci vedrei	lesbica	1	1
17007	basta ragazze vi supplico divento lesbica vasta farmi vedere video di sto carmine, non mi sottoporrò mai ai napoletani https://t.co/uh28XzlksN	lesbica	0	0
17008	@ColuiDi Lesbica non vuol dire sterile.\nMagari non le piacerà ma ti assicuro che se qualcuno glielo stronca nel baugigi (parliamo di Rai 1), resta incinta.	lesbica	0	0
17009	@PBerizzi @repubblica È lesbica... Ma che pennivendolo è?	lesbica	1	0
17010	Per una persona come me (donna, lesbica e vegetariana, per dirne qualcuna) non è facile frequentare luoghi come la palestra. La frequento solo perché mi piace molto allenarmi e le attrezzature le trovo solo lì, ma ne ho già cambiata una e quella in cui vado adesso è davvero	lesbica	0	0
17011	Voglio diventare lesbica ed amare le donne	lesbica	0	0
17012	Con un bacio così io diventerei lesbica... Cmq lui ci è rimasto, è rimasto spiazzato e solo dopo ha iniziato a dire no... X me si mangia le mani di cosa si è perso 🤣 \n#nikiters #gfvip	lesbica	0	0
17013	e ci sono ancora persone che non hanno capito che è lesbica e dicono se solo ciro fosse vivo magari ora starebbero insieme BO https://t.co/qNPOHYeF4Q	lesbica	0	0
17014	Tra l'altro è pure lesbica https://t.co/piggCHjlFo	lesbica	1	1
17015	@repubblica Incredibile che neanche lei voglia un figlio nero. Che razzista. Ma poi è lesbica, come farebbe?	lesbica	0	0
17016	@Cristin70683700 ma non ha detto di essere lesbica?	lesbica	0	0
17017	amo anche se non sono lesbica ma bi ti capisco benissimo 🥹 https://t.co/H3tgI597fm	lesbica	0	0
17018	@ColuiDi è lesbica, mica sterile	lesbica	0	0
17019	@SkyTG24 Ma lei non era lesbica? Perché tira in ballo il razzismo quando non c'entra assolutamente niente?\n\nCon tutto il rispetto ma questa ragazza non sta bene con la testa, ha bisogno di aiuto.	lesbica	1	1
17020	Bf di @petic_grizzly guardando i fratelli haitani dice che Ran non sembra una ragazza ma Rindou sembra una ragazza lesbica	lesbica	1	0
17021	@lvnstov che schifo sei lesbica	lesbica	1	1
17022	e invece l'ha fatto . purtroppo kirk deve stare sempre in mezzo ai coglioni e comunque sam è lesbica https://t.co/gXkZCP0qow	lesbica	0	0
17023	@ColuiDi Non sa neanche lei cos'è se lesbica o bisex ..	lesbica	1	1
17024	NON SONO LESBICA, IDIOTA.\nE NON RIVERSARE SU ME,\nPENSIERI TUOI.\nNON MIEI.\n👋🏻🚪🖕🏻‼️ https://t.co/hDebm6Ci4C	lesbica	0	0
17025	Joe Biden mi ha inviato un messaggio pochi minuti fa quando sono andato in banca, una lesbica mi si è avvicinata nel parcheggio della banca BBVA e mi ha detto che non dovevo dimenticare di portare la biancheria intima durante il mio viaggio.	lesbica	1	1
17026	Questa ha un serio problema esistenziale! Dopo aver mentito sul suo essere lesbica, è evidente che ODIA ESSERE NERA, usa anche una PARRUCCA! Quale schifo hai vissuto? Giochi nella NAZIONALE ITALIANA, sei invitata DAPPERTUTTO! Sei RAZZISTA verso la tua stessa razza,fatti curare! https://t.co/0egOMdza4A	lesbica	0	0
17027	@B4DVASS Non fare la lesbica	lesbica	1	1
17028	@neelvuoto perché sei lesbica?	lesbica	1	0
17029	@_GrayDorian Il kojone gramellini dia il suo posto di "giornalista" ben pagato ad una nera possibilmente lesbica senza rompere i kojoni	lesbica	1	1
17030	Sono così lesbica per Valentina Romani	lesbica	0	0
17031	@adrianobusolin Ma se è lesbica cosa le interessa della gravidanza?	lesbica	0	0
17032	@repubblica Basta con questa disagiata che ha problemi persino con il colore della sua pelle. La sciamola libera di fare la maestrina del nulla altrove.poi di che figlio parla è pure lesbica.	lesbica	1	1
17033	Carinə è carinə, e ho mezza dozzina di amiche che lə sposerebbero domani.\nPerò nessuna di queste è, ecco,\nlesbica. https://t.co/Hm70f4YFmX	lesbica	0	0
17034	@EzioAud46286532 @ColuiDi No lei non era bisex, si dichiarava lesbica, poi ha trovato un soyboy ed è diventata fluida.\nOra aspettiamo che si giri le altre lettere di LGBTQXYZABC++.	lesbica	0	0
17035	@Pasqual63670773 Ah non sapevo che fosse lesbica... adesso è ancora più chiaro il "post su un possibile figlio di colore"🤨🤐	lesbica	0	0
17036	@ilgiornale Paolina....hai dichiarato di essere stata lesbica....ora che hai conosciuto il sesso maschile...prendi le pastiglie anti gravidanza... così eviti che il nascituro sia come la maglia della Juventus.	lesbica	0	0
17037	@middleagewome La bionda di satana comincia già facendo la lesbica amo vederlo	lesbica	0	0
17038	No vabbè ma ormai Maria ha deciso di fare la lesbica anche a c’è posta #cepostaperte	lesbica	0	0
17039	@LaStampa Ma se è lesbica.	lesbica	0	0
17040	@NicolaPorro Voi avete rotto le palle: una Donna, Italiana, di Colore, Lesbica e Intelligente è insopportabile per i vostri mediocri stereotipi	lesbica	0	0
17041	@ColuiDi È lesbica solo quando deve fare proclami per il PD. Sta con un uomo.	lesbica	1	1
17042	@geg93626969 @Scootigera È bisex, non lesbica.	lesbica	0	0
17043	Noooo è una lesbica verace 🥰🥰 https://t.co/arbA84Phqk	lesbica	0	0
17044	vivrò sapendo che nemmeno questa volta avrò la c1 di albedo che cerco da due anni perché sto risparmiando per una lesbica che forse uscirà tra due anni o addirittura non sarà playable ora sbocco	lesbica	1	0
17045	@asthepoetsay_ e io sono lesbica però	lesbica	0	0
17046	@Maedhros67 Visto che è lesbica può adottarne uno bianco, possibilmente ucraino	lesbica	0	0
17047	@ColuiDi Lesbica non è sinonimo di sterile.\nPollo.	lesbica	0	0
17048	Quando lei parla spagnolo io divento sempre più lesbica ormai #oriele	lesbica	0	0
17049	@Jennymineira Vuoi essere mia moglie pussy love carola trans lesbica squirting bocca	lesbica	1	1
17050	@Pasqual63670773 Ah è pure lesbica?	lesbica	0	0
18001	@RAttivo Altro altro, io non parlo è successa na cosa lurida dopo partita che va oltre na bandierina	lurida	0	0
18002	@CarloCalenda La risposta è semplice : l'avidità e l 'egoismo che annebbia la mente e indurisce i cuori .Il ceto produttivo vuole mani libere nel portare avanti i loro egoismi e solo la lurida Dx può garantire questo ,l'autonomia differenziata è uno di questi egoismi che ci porterà al default	lurida	1	0
18003	@matteosalvinimi CACARTI IN FACCIA PER ME E UN DISONORE( LA MIA MERDA MERITA MOLTO DI PIÙ, LO FACCIO PER LA PATRIA.)UN CESSO RICOPERTO DI MERDA LURIDA RICOPRIREBBE LA TUA CARICO CON ONORE E RISPETTO PER LE ISTITUZIONI!	lurida	0	0
18004	@lelegerv Anche il chilo di ghiaccio che mi hai buttato addosso lurida puttana?!🤬🤬🤬	lurida	1	1
18005	@PieroSansonetti Per usare la desueta gentilezza diro' che entrambi sono due pessimi esempi di giornalismo,entrambi dalla stessa lurida sponda.	lurida	0	0
18006	@GiorgiaMeloni 650 milioni di euro per altri "vaccini"... sei solo una lurida ##SERVADELWEF...	lurida	1	1
18007	@MarcoFollini solo la vecchia lurida giustizia di classe potrebbe ripulire il paese da elementi come travaglio/gomez e compagnia cantante. Parole sue eh.	lurida	0	0
18008	@MedvedevRussiaE Egregio Signor Medvedev...fosse per me potrebbe procedere anche con tutte le luride sedi dei lurid infami governi della lurida eu...tanto per cominciare.\nGrazie.	lurida	0	0
18009	Travaglio che sembra scagliarsi contro la “lurida giustizia di classe“ fa semplicemente ridere. È il solito vile questurino fascista e spia di tribunale. Solo i comunisti ci cascano con tutte le scarpe, da venticinque anni.	lurida	0	0
18010	Porca di quella troia vacca impestata. \nAbbiamo perso contro l’Empoli. Questo Empoli. \nI miei figli di una lurida.	lurida	1	1
18011	zoccola puttana mignotta troia battona sgualdrina squillo maiala cessa lurida gatta morta deviata con l’aids inculata da un cavallo con la gonorrea	lurida	1	1
18012	@boilingpoint23 Signor Putin sei un testa di cazzo grande come la lurida serva europa...x aver sbagliato mira nell'accogliere la lurida vonderlain e il cocainomane !	lurida	0	0
18013	@FREE__VEN @Foscari1991 Già aveva un buco in testa infatti non aveva il cervello e dunque una pallottola sprecata …vebeh che non aveva manco palle e cazzo ma solo una lurida lingua russa	lurida	0	0
18014	@valeryzorzi Le offese non esistono x questa lurida	lurida	1	1
18015	@barumiliano Due ridicoli lava capelli lurida	lurida	1	1
18016	@Libero_official Cosa non è chiaro della linea di condatta di questa lurida sinistra? È chiaro il loro intento! Mettere in campo magistratura faziosa, incitare l'odio sociale! Il solo fine è creare caos e disordine! Ora pure gli anarco-insurrezionalisti fomentano! Sono il cancro societario!	lurida	0	0
18017	@kelevra_s7 voglio essere la tua lurida zoccola	lurida	1	1
18018	https://t.co/Y8jGXYwTGr\n#Travaglio - Sul caso Carra\nCarra, che da incensurato non era deputato, lo diventa da pregiudicato nel 2001 con la Margherita. E, oggi come trent’anni fa, la legge uguale per tutti fa scandalo: meglio la vecchia, lurida giustizia di classe	lurida	0	0
18019	@DrPaoloMezzana Chissà se i pifferai della immunità lurida ne faranno menzione	lurida	0	0
18020	@blink187blink @Seghinho3 @MatteoSorrenti Perché devi farmi ripensare a quella lurida puttana che spero che ora guardi i fiori dalla parte delle radici?	lurida	1	1
18021	@xxgiov3 @PornAxe @cam4_gay @GayAmateursProd @Cam4_IT Sono una lurida puttana ho voglia di prendere grossi cazzi come quello di steaxe💋💋💋	lurida	1	1
18022	@icvarusfall ma che cazzo vuoi lurida	lurida	1	1
18023	@misssmistress @promo_bdsm @FemdomAds @Retwitto_Findom @findomWoR @findomitalia1 @sotto_suola @mistressitalia_ Ai suoi piedi Padrona, come una lurida cagna.	lurida	1	1
18024	@Barbara00507780 Lurida puttana	lurida	1	1
18025	@la_bongia Ma che cazzo te ne frega del formaggio sardo con i vermi, mica glielo impongono di mangiarlo !\nMica ci fanno una lurida farina coi vermi dentro !\nE magari con l'intento di non comunicarlo al consumatore ...	lurida	0	0
18026	@GiorgiaMeloni @OlafScholz giorgia giorgia giorgia... mi piacerebbe sapere se gli infami usa-nato-eu ti hanno minacciato di brutto, o semplicemente sei diventata anche tu una lurida schifosa infame corrotta...\nMa ahimè non te l'ha ordinato il dottore di metterti al servizio degli Italiani...	lurida	1	1
18027	@boilingpoint23 C'è un drone col nome della lurida scritto sopra https://t.co/8P73yGSfjO	lurida	1	1
18028	“E, oggi come trent’anni fa, la legge uguale per tutti fa scandalo: meglio la vecchia, lurida giustizia di classe”. \n\n2/2	lurida	0	0
18029	@ParcodiGiacomo una pagliaccia lurida	lurida	1	1
18030	Comunque, anche oggi che è sabato, mi sento portata per un gran mega #buongiornounasega.\nCristo santo, oggi che potrei dormire, mi sveglio alle 6.40. Occhi sbarrati e via 🤬\nMaremma impestata ladra della miseria lurida schifosa!!! 🤬	lurida	0	0
18031	Questa lurida merda cotta può ancora parlare grazie a Calenda e all' invertebrato Letta con l' aiuto del voltagabbana Di Mario https://t.co/V6NkSu1hts	lurida	1	1
18032	@eurodisgusto #VonderLeyenRESIGN #VonderPfizer #SMSBOURLA se continuiamo a riportare pedissequamente le parole di questa lurida affarista, quand'è che ne usciremo?	lurida	1	0
18033	@LStrazecca @welikeduel Lurida carogna , pure sterile	lurida	1	1
18034	"(...) E, oggi come trent’anni fa, la legge uguale per tutti fa scandalo: meglio la vecchia, lurida giustizia di classe."\n\n#Travaglio 🔝\n\nhttps://t.co/8OPDGAAmGI	lurida	0	0
18035	Sul carro di #Carra\n#Travaglio \n\n.."...oggi come trent’anni fa, la legge uguale per tutti fa scandalo: meglio la vecchia, lurida giustizia di classe...!!"\n👏🏼🔝👏🏼🔝 https://t.co/uI6QzoUubj	lurida	0	0
18036	@Libero_official Speriamo che passino dalle minacci ai fatti e ripuliscano la politica estirpando la putrida lurida sinistra.	lurida	0	0
18037	"E, oggi come trent’anni fa, la legge uguale per tutti fa scandalo: meglio la vecchia, lurida giustizia di classe" https://t.co/HF87xYXlnI	lurida	0	0
18038	avete capito bene ho proprio detto la parola con la elle cioè lurida, ovvero sporca, laida, lercia, sozza, sudicia, lendinosa, ignobile, abbietta, immonda, sordida, indecente, oscena, scandalosa perfino	lurida	1	1
18039	@giuditta_pini Ha provveduto la natura a punire questa lurida feccia! Possono avere i soldi, i privilegi e il potere, ma restano una massa di poveri ignoranti, senza cervello come i loro elettori. \n#MeloniBugiarda \n#MINNIE \n#DelmastroDimettiti	lurida	1	1
18040	@FIGC Figli di una lurida e maledetta puttana, dovete sparire.	lurida	1	1
18041	@EsercitoCrucian @Donzelli Questa è una lurida fogna come quelli che l'hanno votata! Il fratello si sta rivoltando nella tomba! https://t.co/QZo1TRrsoM	lurida	1	1
18042	copio falsa gio infame lurida + gli orsetti devono uscire fuori seduta stante \n\n🎐– close moot\n🩹– scary moot\n🧸 – wanna be friend moot\n💌 – twt crush	lurida	1	0
18043	@UKRinIT @ZelenskyyUa Ti cagherei in testa volentieri lurida merdaccia	lurida	1	0
18044	@prelemina4ever È amica di Giulia e tu sei una merda lurida. Ti vorrei vedere dal vivo che sfigata sei merdaccia	lurida	1	0
18045	@sabrina76889322 @GiuliaSalemi93 Lurida parassita schifosa torna nella fogna merdosa in cui vivi	lurida	1	1
18046	cate diocane ti trucido lurida puttana sonk 27 min che sto qua sotto ti apro il craneo te lo mangio	lurida	1	1
18047	@ThamayJ @pisto_gol @SerieA Siringhe in vena. Accertate e prescritte. Spiaze...è la storia. La vostra lurida storia.	lurida	0	0
18048	Ma vi immaginate lo zio ax e dj jad cantare “tocca qui” e “voglio una lurida” nella serata dei duetti? Ho un sogno @jaxofficial #djjad #Sanremo2023	lurida	0	0
18049	Masetti e una lurida cagna\nLurido verme insignificante e leccapiedi \nSi è messo un aragosta in culo davanti a gerry scotti \nA trasformato la sua casa in un porcile \nTra \nTopo 🐁 \nScimmia 🐵 \nMucca 🐄 \nSerpente 🐍 \nCoccodrillo 🐊..	lurida	0	0
18050	Ma va a CAGARE, LURIDA KOMUNISTA..!!✊💩✊💩 https://t.co/wWa1gTwj8F	lurida	1	1
19001	@AMasterPotato Maiala che goduria....	maiala	0	0
19002	@koala_wednesday Tua nonna quella maiala	maiala	1	1
19003	@laprimapaola Con il marito non sarai mai disinibita ma con l'amante come me ti sciogli e diventi molto porcella xke x fare del buon sesso lui porco e lei maiala (provato sulle mie spalle) 🥰🥰🥰🥰🥰🤪🤪🤪😍😍😍	maiala	1	1
19004	Maremma maiala -76°C https://t.co/yXmfmKzc9u	maiala	0	0
19005	@FratellidItalia @GiorgiaMeloni La vergogna di questa maiala non a https://t.co/Zd5VSmVGmp la vita va avanti mentre la morte di avvicina x https://t.co/BFzHPaAkvP che vergogna tradire il popolo	maiala	1	1
19006	@gaiaontop Sei stupendamente maiala... 🖤🖤🖤	maiala	1	1
19007	@SaverioMascaro Maiala quante pedalate ci ho fatto\n...	maiala	0	0
19008	Daniele che sgozza la maiala…\n\n#oriana #GFvip https://t.co/CxCVViXDU4	maiala	1	1
19009	zoccola puttana mignotta troia battona sgualdrina squillo maiala cessa lurida gatta morta deviata con l’aids inculata da un cavallo con la gonorrea	maiala	1	1
19010	@enjoysile Si ma prendi anche a calci in culo la rappresentante lesbo. Solo perché lei è “anomala” per non sentirsi sola nel deserto, vuol manipolare anche le ragazzine. ‘Sta maiala !	maiala	1	1
19011	@niiallstan di dove sei che usi maiala?	maiala	0	0
19012	@FratellidItalia Ma porca maiala ladra, ma perché ci dovete far incazzare??? I codardi si comportano come voi. Vigliacchi ed incompetenti siete.	maiala	0	0
19013	@madame_vau Mi piace molto la biancheria intima e fare la tua maiala con amore carola trans lesbica squirting bocca	maiala	1	1
19014	@_userv Contieniti maiala	maiala	1	1
19015	Chi insulta De Sciglio o qualsiasi altro giocatore ha la mamma maiala e di conseguenza il babbo becco\n#GOBBOSEGUEGOBBO #FinoAllaFine #UNITI	maiala	1	0
19016	@MichaelDones91 Belli perché argomentiamo o perché non siete in grado di rispondere??? Parlami degli stupendi dell'ultimo scudetto. Parlami di tronchetti, dei passaporti, dei 140 milioni di plusvalenza o della maiala della vostra madre. Scarti umani	maiala	1	0
19017	Regia 2 ..vogliamo l'audio..fischia maremma maiala ovvia..che aspettate #GFVIP	maiala	0	0
19018	Elena di Modena , maiala al inverosimile https://t.co/nfMdS8b9A4	maiala	1	1
19019	@tornamuldur Giustamente te mica guardi che è divisa a metà, guardi che ha le zinne al vento poi io sono la maiala	maiala	1	0
19020	@Lucilla11800293 Bella maiala	maiala	1	1
19021	@sunstateofmind_ Maremma maiala, ma proprio lui parla, che in quel cortiletto di M fa il congresso delle maldicenze	maiala	0	0
19022	@LustTaste Sei meglio di n parco giochi maiala	maiala	1	1
19023	@SalvOasi 350 volte l'ho fatto... maremma maiala	maiala	0	0
19024	@MariaElena_mem Me, mi scuso in anticipo, ma avevo letto veramente “da ape maiala” e ho riso forte 😂	maiala	0	0
19025	@ANNA62348499 Maremma maiala quanto sono idioti...se non interagisci ti rompono le scatole se hai troppi contatti un gli va bene...Porannoi😡😡😡FinoAllaFine 🤍🖤👊	maiala	0	0
19026	Per tutto il film a pensare ma io questa dove l'ho già vista? Maremma maiala. #TheBansheesofInisherin https://t.co/2nU1bAZWTw	maiala	0	0
19027	@GesualdoPassan2 Gran maiala riempita di cazzi	maiala	1	1
19028	@GesualdoPassan2 Gran maiala bevi tutta la sborra calda	maiala	1	1
19029	@GesualdoPassan2 Succhia maiala	maiala	1	1
19030	@GesualdoPassan2 Bella maiala	maiala	1	1
19031	Oh Foschina siamo in Toscana ma una partitina a briscola un n era meglio? E tu c hai proprio ragione Cosimo...o maremma maiala e si giocano di nuovo i casale a poker?? 😜\n#FoscaInnocenti\n@fictionmediaset @LuxVide	maiala	0	0
19032	@andrewsword2 Bella maiala!	maiala	1	1
19033	@Dissidente62 😂che bella maiala😂	maiala	1	1
19034	@il_cili Lega maiala figli di puttana	maiala	0	0
19035	@Ilariasigaudo9 Non ti ho dato il permesso di pubblicarmi maiala	maiala	1	1
19036	@Aapocryphaa io te lo giuro non sto ancora realizzando MAREMMA MAIALA	maiala	0	0
19037	@VZanfardini @TgLa7 Sempre con la mamma maiala di qualcuno stiamo	maiala	1	1
19038	@gobbremer Lega Maiala figli di puttana	maiala	0	0
19039	@Francyloverossi Ciao Francy,sei fantastica sei troppo maiala mi piacerebbe un casino sborrarti in faccia anch'io ti adoro.😘😘💋💋💦💦🐷🐷🐷🐷💦💦💦❤❤	maiala	1	1
19040	@haloxserr Ah beh,ai tempi miei s diceva:"speriamo che abbia 🎺,senno' l'è maiala!"(l'è maiala qui sta x"è una tragedia"!😁nel senso che si dava la colpa alla "stitichezza"in certe cose se la prof era1stronza💁‍♀️).In questo caso speravo almeno che fosse più dolce con la classe..😅🤣🤣🤣🤣 https://t.co/bHe92azUaP	maiala	0	0
19041	@Luisamaiala Una bella maiala in tutto il suo splendore 🐷🐷💦💦💦	maiala	1	1
19042	@charlielittledo Bella maiala è un sanguigno apprezzamento 😇 Una mia ex era di Ft Myers e ballava al Pure Platinum di Ft.Lauderdale (fl). Non la ringrazierò mai abbastanza... 😋😁🥰	maiala	1	1
19043	@dominaCleo2 Io ho regalo 🎁 molto più grosso maiala	maiala	1	1
19044	Maiala all’opera❤️❤️❤️ https://t.co/qeIDpzQt2H	maiala	0	0
19045	@Ilariasigaudo9 Sono tutte da maiala	maiala	1	1
19046	Ma spero che solo grumi ci siano in quella polenta mannaggia maiala #MasterChefIt	maiala	0	0
19047	Sara cosa paragoni Francesco ai gatti, come osi offendere così i gatti maremma maiala #MasterChefIt	maiala	0	0
19048	@charlielittledo bella maiala! una volta per vedere cose così dovevi andare nei locali di lap dance in California...	maiala	1	1
19049	@Ilariasigaudo9 Beh la protagonista è una maiala, quindi sicuramente ardua scelta	maiala	1	1
19050	Ho fatto tante foto devo capire quella più da maiala da postare	maiala	1	0
24001	la mucca gemma che prova a dare un limone a nino e tavassi: “che sfigata, proprio sfigata” è tutti noi ✈️\n#gintonic #incorvassi #gfvip\n https://t.co/I2xIxQTpIo	mucca	1	1
24002	Attilio che deve leccare la mucca \n\nÈ tutto così perfetto ✈ #gfvip #gintonic https://t.co/OaTrSfI3JR	mucca	1	1
24003	Mucca è il karma amo solo con Attilio ti puoi accoppiare #Gintonic	mucca	1	1
24004	@aspide9347 Alla mucca se la poteva risparmiare il bacio	mucca	1	1
24005	Maria: “Questa è la storia” - Il mio cervello: “DI MUCCA E DI POLLOOO” #cepostaperte	mucca	0	0
24006	@ninouncrodino preparatevi tutti perchè stasera la MUCCA avrà il suo pezzo di Antonino e clip #gintonic	mucca	1	1
24007	Borsa La Martina L23PW0250052022 Donna pelle effetto mucca\nhttps://t.co/xNhFoAVzkM	mucca	0	0
24008	Oggi l'Infante in formissima.\n(Guardando un libro sulla fattoria)\nIo - Questa è la mucca e questo è il suo bambino, che si chiama...\nInfante - Petra!\n\n(Petra è la sorella piccola di un suo amico 😅)	mucca	0	0
24009	@eltucudiarrea @_ElPrincipe22 e nemmeno \n“La palla viene dal cuoio, il cuoio viene dalla mucca, la mucca mangia l’erba, la palla deve strisciare sull’erba ragazzi”	mucca	0	0
24010	@ariesgirl_5 Si peccato che le da un bacino e poi va pure dalla mucca a darle un bacio sempre onnipresente fra loro questa....e poi ho notato che tav davantii alla mucca non la bacia abbraccia quasi \n\nQuando c e la mucca evita ...quasi non volesse farla ingelosire...	mucca	1	1
24011	@Erich_IT5 Qualche prova tecnica però l’hanno fatta, va detto. Prima la mucca pazza o Creutzfeldt-Jacob a fine millennio, poi la Sars pochi anni dopo. Ed eccoci qui.	mucca	0	0
24012	Borsa morta in finta pelliccia mucca borsa cellulare portafoglio peluche borsa a spalla\nhttps://t.co/bwvNtYEtk0	mucca	0	0
24013	Urliamolo. Non ce la faccio più con le paranoie, soprattutto quando non hanno senso.\n Cioè, parliamo di Ciupi non della mucca pazza. \nFatevi una risata!\n#gintonic https://t.co/qW7J80ZDD4	mucca	0	0
24014	@articoloUnoMDP @Arturo_Parisi @pbersani La risposta è smacchiare il giaguaro, buttare la mucca nel corridoio, pettinare le bambole	mucca	0	0
24015	@mullon34 Carissima mucca, noi tutti ti conosciamo abbastanza la persona che sei, ne uscirai veramente pulita. Non prendi per il culo nessuno, ma te stessa.	mucca	1	1
24016	Spero che lunedì ci sia un’interazione tra i nostri Gin e Nino. E con inquadrature della mucca e di girella così chissà forse lo capiscono che nn c’è storia per loro due e che le clip devono andare a cercarle altrove. #Gintonic	mucca	1	1
24017	@Lalalal69176815 Quanto è vacca nel dna. Poverina mi fa tanta tanta pena. Deve elemosinare attenzioni. Chissa come mai l’ex marito l’ha mollata e Andrea idem.. malata di salsiccia. Continua a collezionare pali.. mucca . Questa sarebbe attrice? Manco alla recita di 1 elementare recitano come te	mucca	1	1
24018	@nervoscoperto1 Speriamo che apra gli occhi anche sulla mucca	mucca	1	1
24019	spotto pacchetto nuovo di chesterfield perso al mucca 🙂	mucca	0	0
24020	@mullon34 Nel dubbio la mucca in calore tua sorella	mucca	0	0
24021	RICORDATEVI CHE LA MUCCA È QUELLA CHE VOLEVA “CALORE UMANO “ DA NINO..PENSATE VOI DI CHE SOGGETTO STIAMO PARLANDO 🤣🤣🤣#Gintonic	mucca	1	1
24022	IL MONDO SI DOVREBBE FIDARE DI TE VERME,MISERABILE,CANCRO DI QUESTO PAESE E PARASSITA,SEI IL RIFIUTO TOSSICO INSIEME AL QUEL MONGOLO DI CONTE E QUELLA MUCCA DI PAZZA DELLA LUCARELLI,VAFFANCULO	mucca	1	1
24023	@nicknick1020 lei capisce al volo quello che sta per dire la MUCCA perchè in quel momento sta provando la stessa cosa\n\nè cosi chiaro ma per voi #oriele nemmeno se si fa un disegnino ci arrivate\n\np.s. quando Dice che schifo Antonino etc... lo dice anche del suo ex di 4 anni, da bimba infantile	mucca	1	1
24024	Vi svelo un mistero se vediamo/notiamo la mucca che entra in confessionale esce e fa a gatta cioè spinta SIGNIFICA CHE VOGLIONO FARTELO VEDERE. SE NO NON CE NE SAREMMO MAI ACCORTI. Fate 1+1 😉 #gintonic	mucca	1	1
24025	Non continuate con sta cazzo di mucca,basta. Siete voi che alimentate l inesistente.\n\n #Gintonic	mucca	0	0
24026	@Klatwit22 non fate i furbi, si vede la bava di Oriana prima ancora che arriva la MUCCA e appena parla di testosterone Oriana salta tutta contenta\n\nma cosa vi entra in tasca a dipingere Oriana per una donzella in pericolo piena di sentimenti, quando ogni gg fa tutto il contrario, bahhhhhhhh	mucca	1	1
24027	La mucca e così imbarazzante mamma mia…poi piange se passa male..tesori belli se passate per Z…forse due domande me le incomincerei a farle #Gintonic #gfvip	mucca	1	1
24028	@mullon34 Mucca io vogliono Che tu vada a pascolare. Tanto Antonino ha Ginevra	mucca	1	1
24029	Va in scena "la MUCCA" in calore\n\ncon la partecipazione di Oriana, che carissimi #oriele !!SPOILER ALERT!!, non sa leggere il pensiero, ma è in calore due volte più della MUCCA\n\n #gintonic https://t.co/vSDIIjGuR7	mucca	1	1
24030	Borsa a tracolla Vera Tucci - Bianco nero in vera pelle di mucca designer italiano\nhttps://t.co/cL8A5sIlOg	mucca	0	0
24031	@soloioanne ti supplico urla qualcosa contro questa mucca senza dignità https://t.co/UYdLFSyrtl	mucca	1	1
24032	Cara mucca, capisco che la presenza di Antonino faccia un certo effetto. Tu continua a colare bavetta perché puoi effettivamente solo guardare, fino a che starai lì dentro. \nSo che ti piacerebbe, ma ti piacerebbe proprio tanto!!\nA ROSICONAAAA\n#Gintonic	mucca	1	1
24033	Mucca puoi solo guardare spiace per te, proprietà lambo\n#gintonic https://t.co/JCo5SrUYU2	mucca	1	1
24034	"Ringraziamo il grande fratello per averci regalato antonino in questa edizione, a nome di tutti, chi più chi meno"\n\nIo ve lo giuro è così cringe la mucca\n#gintonic	mucca	1	1
24035	MA DITE COSA HA DETTO LA MUCCA #Gintonic	mucca	1	1
24036	@Dissidente62 #buonsabato\nLa mia mattina è presto.\nSculaccio la mucca femmina. https://t.co/1UDitf8Blp	mucca	0	0
24037	@andreabell96 Buongiorno\nLe mani sporche di lavoro..sano..\nnn sono mai mani sporche!\nComplimenti..stanno bene mucca e vitello?	mucca	0	0
24038	Oriana che pur di non ridurre il suo rapporto con Dani a una dinamica parla di gelosia con la mucca solo a telecamere spente #oriele	mucca	1	1
24039	Masetti e una lurida cagna\nLurido verme insignificante e leccapiedi \nSi è messo un aragosta in culo davanti a gerry scotti \nA trasformato la sua casa in un porcile \nTra \nTopo 🐁 \nScimmia 🐵 \nMucca 🐄 \nSerpente 🐍 \nCoccodrillo 🐊..	mucca	1	1
24040	@applefruit84 Origano stai attenta alla mucca 😂😂😂😂😂	mucca	1	1
24041	Ma la mucca nn si vergogna neanche un po... se le urlano le peggio cose fatti una domanda e datti una risposta #oriele	mucca	1	1
24042	Ovvio che oriana svia, e non chiuderà neanche con la mucca perche non è da persone mature smettere di frequentare una persona perche te lo dicono delle persone che non conosci, pero ora ci farà piu attenzione sicuro #oriele	mucca	1	1
24043	ora magari la mucca non parla più e non rompe #oriele	mucca	1	1
24044	RAGA MA QUANTE ERAVATE GIURO CHE BELLOO AHAHAHAH HO URLATO LA MUCCA SI DEVE CAGARE SOTTO #oriele	mucca	1	1
24045	il demone con la testa di mucca???https://t.co/PzYsCIurOx	mucca	0	0
24046	ho letto che hanno litigato di nuovo e non sto seguendo ma una cosa mi interessa molto: le urla le hanno riportate a Oriana soprattutto della mucca? #oriele	mucca	1	1
24047	@Gaby45yo1 @OfficialTozzi Così finalmente, essendoci sanissime alternative, il prezzo lo paga l'umano e non la mucca.\nE non c'è bisogno dei grilli.\n🌱	mucca	0	0
24048	@Yle56659193 Niente ohhh proprio una mucca. Anzi forse le mucche capiscono meglio di lei	mucca	1	1
24049	Ma vogliamo parlare fi nino che se la da a gambe levate dopo il leccaggio della mucca?!🤣🤣🤣 #gintonic	mucca	1	1
24050	Prima che il padrone arrivasse a casa ho ordinato alla mucca di fargli un bonifico\n\nAlle 16 esatte è scattata la notifica\n\nFottuto da una 19enne \n\nE ora? Lo ignoro e scopo col mio uomo\n\nEccolo, in ginocchio, col portafoglio in mano e le mutande in bocca 🐶\n\n#alphacouple https://t.co/RKbPr14ub3	mucca	1	0
25001	Sti acuti da pelle d’oca Madonna Santa #cepostaperte https://t.co/BoSXyyP3eP	oca	0	0
25002	@regno_disoleil Questa oca voleva scottare con la piastra li in Spagna e si è scottata lei qua in Italia 🤣🤣🤣	oca	1	1
25003	@janiss_xoxo anche io voglio un’oca di nome pippo	oca	0	0
25004	antonella guarda non penso propio che alberto ha detto di te che sei colta,lui da il significato di colta e non lo va a dire alla prima oca che incontra,non ti reputa simpaticissima e inteligente. #ThePisis #oriele	oca	1	1
25005	La SINISTRA oca starnazzante NON era all'altezza.	oca	0	0
25006	Fulvio che sul finire dell'esibizione manda un bacio al cielo ricordando Fabrizio da pelle d'oca 🙏😭😭😭 #TaliEQuali @CarContiRai @taleequaleshow https://t.co/6hYnnppQtN	oca	0	0
25007	Si stanno divertendo solo le 4 dell'oca selvaggia #donnalisi	oca	0	0
25008	@paola_strange @pensandocimeno @JungerMatilda @stesecci88 Quanto ti definisce quello che scrivi. 😁\nContinua pure, compagna di st’oca, io silenzio.	oca	1	1
25009	A #TaliEQuali ora si ridicolizza anche la gente brava. La signora dell’ascensore che imitava Giorgia non era da umiliare così con le urla di quell’oca di Malgioglio assolutamente ingiustificate.	oca	1	0
25010	@MaryPsy76 Davvero, mi ha fatto venire la pelle d'oca talmente è bravo.\nIo spero che questa edizione la vinca Ligabue.	oca	0	0
25011	@lu_cabron @l_honestly @SandroSca_rpa Abbiamo studiato il CIP6 o sei troppo OCA e non ci capisci un cazzo? Ti regalo una chicca CHINE era quello di passaportopoli.... coglione	oca	1	1
25012	#gfvip quell oca di orina vuole fare solo quell insulso giochino ma dategli un altra bottiglia di vino così sta zitta sta ubriacona	oca	1	1
25013	1 di 3\nascoltatelo attentamente, è da pelle d'oca, fossi un medico con la coscienza poco pulita...mi eclisserei. https://t.co/XiKT5OCd06	oca	0	0
25014	Ho finito la pelle d'oca! #vascorossi #TaliEQuali	oca	0	0
25015	rivedere immagini delle gare di nuoto mi fa venire sempre la pelle d’oca 🥹	oca	0	0
25016	@tinetta22 Le foto dove ha la pelle d'oca per i brividi le hai mai viste?	oca	0	0
25017	Se la musica ti fa venire la pelle d’oca https://t.co/ODBWMoOoyG	oca	0	0
25018	@JacopoVeneziani la storia dell’operaio e dei quadri all’asta mi ha fatto venire la pelle d’oca… magistrale come sempre!!!	oca	0	0
25019	Giogggia Cocomeri marcia sul parlamento con il passo dell’oca.	oca	0	0
25020	@NicolaPorro concordo e aggiungo che se ne è andata in Turchia a prendersi un 1 milione di ingaggio e adesso sputa su chi gli ha consentito tutto questo... La solita oca che crede di essere protagonista e non si accorge di essere solo stupida... Gioca a volley e non rompere le palle	oca	1	1
25021	@oathkeepergirl Io nella mia personale vetta conservo sempre la 6x10. Alla fine di quella puntata avevo la pelle d'oca	oca	0	0
25022	@Antonel34928201 @LaStampa Ti dovresti vergognare tu e ritrovarti con la pelle nera per tutta la vita che ti resta. Oca.	oca	1	1
25023	Vi giuro che sento il theme di sanremo e ho la pelle d’oca quanto cazzo mi piace litrally la Settimana Santa	oca	0	0
25024	Ogni volta che lo ascolto ho la pelle d’oca! Chi è vecchio come me può capirmi chi non lo conosce non capisce un cazzo dì musica! #Davidgilmour Comfortably Numb Guitar Solo live in Gdansk - one of the b... https://t.co/VHYD88f7VA via @YouTube	oca	0	0
25025	@CriCrilaPew @nuvolacristallo @Paolo_So_io La tua critica è fuoriluogo la solita bla bla da oca che starnazza	oca	1	1
25026	freen mi ha fatto venire la pelle d'oca	oca	0	0
25027	Quelli che fanno la morale su tutto. \nBell’esempio che questa oca dà alle ragazzine di oggi: il bello è solo il super magro. #Ferragni #fedez #Sanremo2023 https://t.co/9trlkO4EjV	oca	1	1
25028	So che anche tu quando hai letto zampa d’oca sei andato più in confusione di #Correa davanti al portiere\nNon ti preoccupare, ci pensa il dR.anocchio!\n\nhttps://t.co/nVtmJviWr5\n\n#lukaku #infortunio	oca	0	0
25029	ho la pelle d’oca non vedo l’ora https://t.co/USH86MAqYe	oca	0	0
25030	@AlessiaMorani Sei la solita oca fallita. Infatti per far parlare di voi difendete un terrorista anarchico. Trova le differenze CHIACCHIERONA	oca	1	1
25031	@salvinimi Brividi e pelle d'oca	oca	0	0
25032	@firegold763 Band odiata da incompetenti. \nBasterebbe andare a sentirli in qualche stadio, sulle note di Fix You ti viene semplicemente la pelle d'oca.	oca	0	0
25033	@DrGregHouse73 @Raffaele_Galar Certo.\nMagari sotto la luce della candela.\nE senza dimenticare l'inchiostro per la penna d'oca.\nMa perché arrampicarsi sempre sugli specchi, con obiezioni (legittime) ma inusuali?\nIl libretto cartaceo delle ricevute.\n"Prendo una candela e scendo a recuperarlo in ufficio..."	oca	0	0
25034	@CristinaMolendi Ma fatti una vita oca	oca	1	1
25035	@maurobiani @coe_ita @repubblica Purtroppo, vergognosamente, a non sentire sono e sono stati in troppi...e mi viene la pelle d'oca a pensare quale governo c'era nel 2017, quando è stato stilato questo accordo disumano...	oca	0	0
25036	@eziomauro Bella ma oca è già stato detto?	oca	1	1
25037	@GrandeFratello Sta oca giuliva ormai ha stufato 🤦‍♀️	oca	1	1
25038	@CCulurgioni @luciajauregay @sheldino93 Quanto sei oca! Immaginati a scuola che ti etichettano così … persone che ci ridono sopra altre no! Dipende dal carattere e da tanti altri fattori! Ma siete troppo indietro x poter capire!	oca	1	1
25039	La phata mi fa venire la pelle d’oca 💀#oriele https://t.co/ndzTZw7ukR https://t.co/4jfPek9lz3	oca	0	0
25040	madonna ma perché non te ne stai zitta oca di merda	oca	1	1
25041	@janiss_xoxo pippo, l'oca che la prossima volta che la sento urlare alle 7 di mattina la scuoio	oca	0	0
25042	@GiuseppeConteIT @c_appendino @Mov5Stelle Ma stai sempre a starnazzare come una oca?	oca	1	1
25043	@ChampionsLeague Solo lui mi faceva venite la pelle d’oca!!! Che magie che campione… il calcio quello dche diverte in persona!!!	oca	0	0
25044	🇮🇹 IO SO IO, 3yo colt by @harasdannebault AFFAIRE SOLITAIRE from TROPPO OCA, wins the Premio Monteriggioni - maiden 1.700m at Syracuse for his 2️⃣nd start.\n\n➡️ TROPPO OCA winning of G3 Premio Mario Incisa Della Rocchetta. https://t.co/C9R4o6NJ3l	oca	0	0
25045	ho appena finito il documentario di fede, ho la pelle d’oca giuro	oca	0	0
25046	@AntonelloAng @super_caz E un tribunale che annulla la sentenza di assoluzione e fa rifare il processo che sentenza potrebbe produrre, oca?	oca	1	1
25047	@SardoneSilvia Ma ritirati oca .	oca	1	1
25048	@sebmes @repubblica La risposta di Donzelli- concubino, Minni, Fdi - oca giuliva, alla Boschi, è da bimbominchia.	oca	0	0
25049	CHE BELLO! Ho la pelle d’oca❤️ #incorvassi #gfvip https://t.co/Kmyk06rnZu	oca	0	0
25050	@Lia_Varoli @stanzaselvaggia L'oca selvaggia fa parte della stessa scuola di scribacchini bimbominchia che non crescono mai e restano i bulletti da strapazzo con codazzo di leccaculi\nRegaliamo a quell' oca e a quel lurido scribacchino di Travaglio una carta igienica con la faccia di Conte	oca	1	0
26001	@NicolaPorro Come al solito senza dignità, oggi il tuo padrone ti ha ordinato fango contro Paola e tu giù a pecora come sempre.\nVerme.	pecora	1	1
26002	@ValeDido @OggiEvoMedio Probabile, problema di quella media è che è fatta da 95% (pecore) che, se va proprio bene, sul lungo periodo non ci han perso e un 5% (lupi) che ha guadagnato moltissimo\nSe fai trading su informazioni che hanno tutti, quando ce le hanno tutti e con stessi strumenti, sei pecora	pecora	1	0
26003	@King1Brutal Poi uno che si fa un concerto intero belando come una pecora perchè s'è accorto all'ultimo che il palazzetto dove gli hanno organizzato il concerto è quello di scientology per me è un idolo!	pecora	0	0
26004	Disse la pecora Dolly prima di essere clonata. #CePostaPerTe https://t.co/5gm9w4fWzs	pecora	0	0
26005	Un leone non perde il sonno per l'opinione di una pecora.	pecora	0	0
26006	@PaolaGiuffrida1 @fuoridalcorotv @mariogiordano5 SI RIFERISCE ALLE PERSONE NON AI MAIALI SE TU 6 UNA PECORA PERCHÉ NON DEVI FAR MANGIARE IL MAIALINO AI CARNIVORI.E LASCIA STARE I VANGELI	pecora	1	1
26007	@alteregodisimo @milamentoaa Io pure senza alcol sto a pecora, ma con te mi si seccherebbe così tanto che nemmeno dopo una bottiglia di scotch riuscirei a mettermi a pecora per te	pecora	0	0
26008	@joelserras Erborinato di pecora Sancarlone, distribuit per Guffanti, tota la resta són succedanis	pecora	0	0
26009	Le donne valgono meno di un cammello e sono un peso di cui liberarsi quanto prima,barattate come nemmeno una pecora.Pedofili maledetti bastardi autorizzati https://t.co/0qhRTVObdP	pecora	0	1
26010	La mia pecora in famiglia è mio cognato somma più di venti anni di carcere ... chiesto se in galera a mai visto un politico per farlo visita ...\nCol cazzo che li ha visti https://t.co/N0Kr92EGxq	pecora	0	0
26011	@SevyDC @jguaido Dovresti vergognarti di essere una misera pecora https://t.co/mRVOuEbfT6	pecora	1	1
26012	@sierogenico MFW la tipa che mi piace si è decisa a darmela ma ho ancora gli intestini di pecora nell'essiccatoio.	pecora	0	0
26013	@milfitaliane41 Wow che pecora da scoparti da dietro scrivimi ti voglio conoscere sei figa🍆🍆🍆🍆💦💦💦💦💦	pecora	1	1
26014	#gfvip\nTontonella dice di dire le cose in faccia \nQuando è davanti Oriana diventa un pecora con il muso da papera\n#FuoriAntonella	pecora	1	1
26015	@DeCarand @ernestomendace Ogni famiglia ha la sua pecora nera 😄😉	pecora	0	0
26016	@Avv_Bianco_Nero @Corriere @SerieA @FIGC Ma pacificamente mi raccomando anzi andiamo con il culo a poppa così non fanno neanche lo sforzo di farci mettere a pecora	pecora	0	0
26017	@OmarDBorio @enrico_pennino @Alessan87633271 @tancredipalmeri La cassazione è la cassazione e tu non sei un cazzo e non rappresenti un cazzo .\nSei solo messo a pecora dal 2006 e quest’anno si ripete 😆😆😆😆😆	pecora	1	0
26018	@russguard Nn è colpa nostra ne dei ragazzi è il sistema che c'è lo propone,dobbiamo riprenderci la nostra vita.Nn sono vaccinata e nn voglio essere una pecora del sistema.	pecora	1	0
26019	@Maurizio_89 @acmilan Ci ha fatto vincere la partita il cambio Vigilucci per Asllani 🤣🤣🤣🤣🤣che cazzo di partita ti sei visto 🤣🤣🤣🤣🤣🤣sei la classica pecora che dice che va tutto bene bela pecora bela 🤣🤣🤣🤣🤣👋🏻👋🏻👋🏻👋🏻	pecora	1	0
26020	@matteo_milan91 “non sei una pecora ma un lupo, o un leone in questo caso”. sono letteralmente i colori di una tigre	pecora	0	0
26021	@milamentoaa Voi si invece, bastano un paio di cocktail e siete già a pecora. Ma statevi zitte va che siete tutte troie. All inizio tutte brave innamorate poi basta poco e siete già a pecora	pecora	1	1
26022	@SimonaB26806216 il tuo nickname sonoacqua mi fa sorridere leggendo il tuo tw sul brunello , sei molto simpatica , io invece dell' anatra era meglio che mettevo una pecora nera come immagine, ciao buon fine settimana	pecora	0	0
26023	@danse_lune Capri puzza di pecora	pecora	0	0
26024	@teenroommate Certo Arianna, è stressante svegliarsi, fotografarsi a pecora e il tutto pagato da pervertiti	pecora	1	1
26025	@Melaion @NicolaPorro Spiace siamo in tanti a non amare la tv spazzatura....\ne se per la sua sicurezza, nel fare il suo lavoro per noi, qualche politico utilizza la scorta fa benissssssimo. Non mi sento pecora, spiace.	pecora	0	0
26026	ERRATA CORRIGE\nLo scontro è ed è sempre stato tra il FINTO STATO contro i cittadini considerati né più né meno come 🐑🐑🐑 allo stato brado, la pecora si sa, ha paura del lupo, ma non è consapevole che sarà il pastore a portarla al macello!\n#MeloniBugiarda \n#MeloniAgendaDraghi https://t.co/0KKFkIxf4w	pecora	0	0
26027	@itsmeback_ Ripensando all' origine della UE e a quelli che l'hanno costituita mi viene spontaneo un proverbio: "Chi si fa pecora il lupo la mangia"	pecora	0	0
26028	@LegaSalvini Io meridionale PECORA che vi ha votato la prende a PECORINA ,bravi ciucci	pecora	1	0
26029	Leoni in Italia, a pecora in Europa!\nMeloni datti una mossa! https://t.co/hB0DF3RD7x	pecora	0	0
26030	Non mangio nè maialetto, nè carne di pecora e nemmeno il pecorino https://t.co/ESKkfzdUTY	pecora	0	0
26031	@petergomezblog @fattoquotidiano La Germania che accusa glia altri di crimini di guerra???? Oo ahahahahahahah la seconda guerra è stata l’altro ieri e non appena appena dopo l’impero romano! I crucchi sono merda e cui li sta dietro è pecora!	pecora	1	0
26032	Rara borsa vintage anni '60 mini pelle di pecora afgana mini borsa da sera mod scooter gogo\nhttps://t.co/trFuARz8A9	pecora	0	0
26033	@DVATW Chiedilo a Putin! La NATO ringrazia Putin! Pecora!	pecora	1	0
26034	@ZAsmati @thatdayin1992 Se per valori intendi quelli della dittatura, hai ragione sei proprio un cerebroleso ignorante!pecora!	pecora	1	0
26035	@_RoteFuchs Tirarteli forte mentre a pecora lavoro con tutto il resto.....comunque complimenti in viso sei stupenda!!!!	pecora	1	0
26036	Dooooojo one week. Meglio un giorno da leone che 100 da pecora !! https://t.co/0zRVcWOBLu	pecora	0	0
26037	@Rotelli_MD Si vede che è tutto falso.\n\nLa pecora è ancora vestita😂	pecora	1	1
26038	@victoria7xd A pecora 🐑👅 e ti stringo i capezzoli	pecora	1	1
26039	@pavolsizz Cicci bello de zio come stai ? Io comunque du botte de cazzo ie darebbi a patto che se metta a pecora sennò co’quaa frappa me trancia ogni vorta che je calo n’affondo de cazzo italico co’ contaminazioni cinesi visto che moo faccio ciuccia’n’par de vorte a settimana.	pecora	1	1
26040	@Misurelli77 Un giornalista che non si genuflette....si mette a pecora....bravo....	pecora	1	0
26041	Due compleanni stasera: zio e nipote.\n\nSuocera ha fatto petto di pollo fritto, spuntature di maiale, pecora e patate al forno. Per dessert c'era il mio tiramisù e infine frutta sciroppata e spumante.\n\nMagnatevele voi le cavallette!	pecora	0	0
26042	@MoglieInMostra1 Andiamo mettiti a pecora che ti trapano il Culo	pecora	1	1
26043	@StasHavrylyuk Ti aprirei già a pecora	pecora	1	1
26044	#gfvip Salemi non fare la pecora della Bruganelli!\nQuesta dice solo sciocchezze!	pecora	1	0
26045	@GaviraghiMiriam @juventusfc Ti sbagli Miriam. Oggi la comunicazione è tutto per una società di Entertainment. Se sei assente, se non prendi subito posizione, prima che lo facciano gli altri, sei MORTO. La Storia insegna. Se ti fai pecora, il lupo ti mangia.	pecora	0	0
26046	Ovvia ora che ho finito Mare Fuori, vo a dormire abbracciata a U Pecora 😍	pecora	0	0
26047	come@sta il figlio di pecora nera ? ieri aveva la febbre	pecora	0	0
26048	dare colpa al lupo… fa comodo alla pecora… la stessa che verrà uccisa da chi …ha dato colpa al lupo. https://t.co/bFq8Yfw40X	pecora	0	0
26049	chissà che audio infuocati sta mandando cesarin4 pecora nera nel gruppo telegram monnaliso	pecora	0	0
26050	@SecolodItalia1 al di là di chi abbia votato, oggi l'ho sentita nella trasmissione "un giorno da pecora" e debbo dire che mi ha favorevolmente stupita.	pecora	0	0
27001	https://t.co/I1ipIYOUMy\n#Fantasy, #Dark Fantasy, #Mito #IARTG \nColui che fa patti con i mostri deve prestare attenzione! Un eroe stringe un patto sacrilego con una strega e scopre che la magia non dimentica mai.\nStorie di miti in una terra di magia proibita.	strega	0	0
27002	Questo è il tweet del giorno! 👏 👏 👏 👏 👏 hai capito tutto amore! Niki baccia solo Luca per creare polémica, è Dani perche pensa che può infastidere Ori, invece la Bebe, ha bacciato quasi tutti e si gode il giocco. Abbiamo capito come è fatta la strega ormai #gfvip #oriele https://t.co/S51MjpK8SI	strega	1	0
27003	@ElChicoDeGH Doveva dare un bacio a stampo come tutte. Invece ha fatto una porcata solo per far incazzare Oriana. Altro che fata questa è una strega #oriana #oriele #INCORVASSI	strega	1	1
27004	miiiinchia immagino già la faccia di strega Varana lunedì sera in puntata #oriele https://t.co/ao9zRIwxs4	strega	0	0
27005	strega varana si sente veramente incinta di luca STO URLANDO #oriele	strega	0	0
27006	@sweetlullaby0 Miiii mi ha fatto tornare fame.\nLa proverò. Notte Strega. 🙏🌹🖤	strega	0	0
27007	@blanchewitch17 @woodyever370 @ladyoscar_41 @DocReQIsBack @sardo_anonimo @R13V0LU5C10N @nausica_77 @VeronicaChiara5 @Andre_Neo89 ❤️❤️ senti chi parla..una strega da favola 😘	strega	1	0
27008	Ecco le Amichette false patologiche che sparlano di Alby, vergognose #fuoriantonella #fuorinikita #nikiters strega N°1 #fiorde strega N°2 #thepisis #iostoconalberto #GFVIP #donnalisi	strega	1	0
27009	#gfvip la strega blu che parla male di Alberto perché è in nomination con lei \n Viscida @GrandeFratello	strega	1	1
27010	Io ho goduto di più per lo schiaffo di Antonino alla Strega che per il limone! Ho adorato! #oriele	strega	1	1
27011	@SilviaCalvario @Scootigera faccia da strega, chi lo dice lo è, specchio riflesso, gnegnegne!	strega	1	1
27012	Secondo me è l'astinenza, la droga fa male #Oriana la strega maligna #gfvip	strega	1	1
27013	TAMARA : IDEM.\n\nLE TUE MAKUMBE\nPERCHÉ TI SVERGOGNO\nE LA PRENDI IN CULO\nUSATELE PER SUPPOSTA \nA TE STESSA.\n\nSTREGA DI MERDA.\nCESSA DENTRO! \n🖕🏻🚪🖕🏻‼️ https://t.co/qmA1Skvosz	strega	1	1
27014	IO VIVO E GODO SOLO PER LE FACCE DA ROSICONA E STREGA MALEFICA DI NIKETA CHE NON SI MANGIA UNA RISATA OGNI VOLTA CHE INVECE TAVAX FA PISCIARE SOTTO PURE IL TOPO CHE VIVE IN CASA 😏👌🏻 #INCORVASSI #oriele https://t.co/YSJrKWttvd	strega	1	1
27015	@notasimplefando ho forse detto che non doveva rispondere? ho detto che è inutile trattarla come il povero cucciolo indifeso vittima della strega, dato che anche lei provoca e risponde	strega	0	0
27016	Ahhhh allora Niki è la strega cattiva che fa le macumba ma il sushi che ha fatto lei se lo magnano tutti eh.. e che bon che l’è. Manega de stronzi falsi! #nikivip #dakita #iostoconnikita #nikiters	strega	1	1
27017	@eeudaimoniiamp4 chi cazzo ride amo mi è venuto il colpo della strega prima sul cesso	strega	0	0
27018	@diehexe68 Buona notte Strega....🌃 E portami fortuna.... perché qui si mette male...😫	strega	0	0
27019	Che strega Oriana\nLa tipica bulla dei film americani \nSolo che ha 3O anni\nChe imbarazzo\n#donnalisi #GFVIP	strega	1	1
27020	È proprio una strega sul rogo in attesa della morte https://t.co/vqV1nHXDIg	strega	0	0
27021	@uunformat La strega si fa baciare da Daniele o da Luca si aprono le scommesse	strega	1	1
27022	@IolandaRomano3 @HaylijahXoxo @simona_laziale Ciro non ha mai avuto il suo mare fuori , .Invece Edoardo ha trovato la sua speranza in Teresa però quella strega di Liz li allontana .Lei pensa di metterlo in riga ma in realtà gli sta facendo del male,facendolo stare con una che non ama e che lo porta sulla criminalitá	strega	1	0
27023	@diehexe68 Strega, sai che nn ho fb..... Ma guarderò yt...o i filmini di mio figlio quando a fine mese rientrerà in Italia 👍	strega	0	0
27024	@GrandeFratello Tontonella che falsa che sei se tuo padre non ti compra il botto di voti sei già fuori sei una strega viziata 😡😡😡	strega	1	1
27025	T h i s. E non siccome già da piccola non ero il robot che volevano, mia madre sbottava e mi diceva che ero una strega/vipera/palla velenosa/la rovina della sua vita/un mostro/parassita https://t.co/VzD3djvYiq	strega	1	0
27026	@ConfortiTiziana Ma che problemi mentali hai? Ma perché devi offendere così? Ma chi ti ha educata la strega cattiva? Che poraccia di persona che sei 🤦🏼‍♀️	strega	0	0
27027	@lellinara Colpo della strega.	strega	0	0
27028	@sunstateofmind_ Togli tu metti la foto strega di Oriana	strega	1	1
27029	@DiMarzio @bncalcio Caro @bncalcio , complimenti per la scelta, seppur tardiva. Ma, da osservatore esterno e con occhio di simpatia verso la Strega, ti dico che c'è ancora una parte della colonia "Soccavo" che deve essere debellata. Il presidente saprà cosa fare. Saluti "affettuosi" per Improta...	strega	0	0
27030	@SicilianoSum E' la 4° volta che lo va a trovare...c'è attrazione tra di loro...si vede...Che strega!	strega	1	0
27031	@FraSettanta @CampiMinati Il tuo ragionamento è equilibrato, la penso come te, personalmente sono solo stanco di veder rappresentata la mia squadra, dai media e da giudici tifosi, come strega da bruciare sul rogo. Solo questo.	strega	0	0
27032	@FortunatoBille Che succede? Colpo della strega? Si scricchiola?	strega	0	0
27033	@tinyscribbles_ Molto strega purificando i cristalli vibes	strega	0	0
27034	@CasiraghiAlbert E' una strega di merda che DIO la fulmini	strega	1	1
27035	@TerreImpervie La strega di Hansel e Gretel aveva di diverso solo un porro sul naso	strega	0	0
27036	@Adnkronos Questa strega inetta sta danneggiando l’intera Europa peggio di 100 Putin messi insieme	strega	1	1
27037	Ce sta più #MSM che #anarchici (4/500 in tutto) e ve giuro 'sta strega cantava:\nFUORI🎵 ALFREDO🎵DAL #41bis 🎶\nFUORI🎵TUTTI🎵dal #41BIS e poi"sono in 750 in Italia al #41Bis..possibile che sono tutti mafiosi?"\nh17p.zzaVittorio\n#Cospito\n#MessinaDenaro\n#trattativastatomafia\n#Mafia https://t.co/HPPXvaGy6a	strega	1	1
27038	@uunformat Limona pesante con bebè si eccita ....barzotto e poi va dalla strega Ke grande uomo	strega	1	1
27039	@_hijadelanoche E dopo la limonata con toccate l'eccitato di merda sta con la strega merda bipolare	strega	1	1
27040	A Phata non ti appoggiare #oriele sta strega che gli ha tolto gli occhiali in un modo che le avrei sputato in un occhio	strega	1	1
27041	Ma perché gli ha tolto gli occhiali sta strega #oriele	strega	1	1
27042	@Agenzia_Ansa Mi piacerebbe venisse fatto un sondaggio dei cittadini europei su chi ama questa strega...	strega	1	1
27043	@Robertonuzzoam E se penso che questa strega megera è stata eletta grazie ai 5 sterchi... https://t.co/5uwszaAhaH	strega	1	1
27044	@Lalla84455247 Ma calmati cretina parevi una santa ma mi sa che sei tu la strega	strega	1	1
27045	Ma Giaele che usa lo specchio di Antonella ma cm le viene sta strega dp tutta la cacca che le butta bah #donnalisi	strega	1	1
27046	@CircusRedTicket Come la mela rossa lucida della strega di Biancaneve	strega	0	0
27047	RIVIVI IL LIVE TB - Diretta Goal Serie B: Bari, tre punti col brivido. Sudtirol inarrestabile. Poker Perugia, tris Citta. Il Venezia manda la Strega all'inferno" https://t.co/BboprHnZdY	strega	0	0
27048	@Luig66063261 funziona sono una strega	strega	0	0
27049	@funny_dreamer16 Ma come, non siete quelli che sostenete a spada tratta la satira? Nikita è una strega che porta iella, ma è satira, per voi non vale? Siete proprio dei saltimbanchi di un circo di quart🤮🤡🤮🤡🤮'ordine!!!! 🤡🤮🤡🤮🤡🤮🤡	strega	1	0
27050	Pittura piemontese tra la metà del Quattrocento e la metà del Cinquecento.\n\nE’ stata prorogata fino al 26 febbraio l’apertura della mostra Rinascimento privato - citazione dal romanzo di Maria Bellonci, Premio Strega 1986.\n\nhttps://t.co/VnGjV5IJ47 https://t.co/Tq74fwSKKH	strega	0	0
21001	Questi sono così simili porca vacca #oriele lang:it	vacca	0	0
21002	@paolo_caciolli Perchè hai mai visto una Vacca cacare?	vacca	0	0
21003	@MicheleAngeril Due stronzi cacati dalla stessa vacca 🤮🤮	vacca	1	1
21004	Ragazzi sondi essere logorroico ma la stagione purtroppo si doveva capire che potesse andare in vacca tra rinnovo del garante non mercato fatto né estivo ne invernale e in più un mediocre allenatore che ha perso umiltà e si crede Guardiola!	vacca	0	0
21005	@AlfredoPedulla Come buttare in vacca una carriera\n.	vacca	0	0
21006	Peppe. Di Stefano ha appena mandato in vacca la notte a Limone ma vi vedo preoccupati, let Peppe cook	vacca	0	0
21007	@antizhanghiano_ Mi starà pure poco simpatico ma ci credo che poi gli tocca rispondere “certo” ad ogni domanda.\n‘Ca vacca che cacchio di domande sono…	vacca	0	0
21008	L'unica sera in cui le NFs non mandano tutto in vacca	vacca	0	0
21009	@TriviumPaolo @RamazzottiEros Porca vacca! @RamazzottiEros ma cosa cazzarola sto vedendo!!!!	vacca	0	0
21010	Ma come figlia di napoletani io vi devo fermare!! Bastaaaa!! \nSmettetela!! Fatemi fa' na grattatina porca vacca!! \nDiciamo solo:\nNon succede ma se succede 🤞🤞🍀🍀🍀🧿🧿🧿 https://t.co/YR8ubXlyEw	vacca	0	0
21011	Avete rotto il cazzo con sta vacca...come si dice al mio paese!! come siete pesanti x un bacio sulla guancia..non avete capito niente di Antonino!!! #gintonic	vacca	1	1
21012	@CarloBotta_ questo è un grande mistero, come si può essere così cinici e assassini conclamati, da nn capire che ci stanno portando all'inferno, con tutte le scarpe, \nUrsula una vacca fatta donna	vacca	0	0
21013	Ubaldo Pantani identico a Flavio Insinna porca vacca\n#TaliEQuali	vacca	0	0
21014	@sinisam1970 @ri_not_ri @Roko435 Tua madre resta una gran vacca, però. E tu uno col cazzo corto.	vacca	1	1
21015	@MFelysya @Retwitto_Findom @MistressPromo_ Sono onorata di essere la vacca di Miss Felysia	vacca	1	0
21016	Guardate, ho timbrato la sua tetta come una vacca, ebbene si lei é una Mia Vacca, ve la presento "Ramona la troiona!" @bertelli_e @Retwitto_Findom @MistressPromo_ #humiliation #sissyfantasy #femminlizzazione #fetish #bdsm https://t.co/CviRgfcGZk	vacca	1	1
21017	@baxter017c Si per pulire la stalla della vacca	vacca	0	0
21018	Vorrei sedermi lì, essere figlio di Zeus, giudicare vivi e morti, non sacrificare il toro bianco a Poseidone, accettare che mia moglie in una vacca di legno si unisca al toro, far costruire un labirinto per il figlio mezzo toro di mia moglie, essere così. https://t.co/9HQRul3iW4	vacca	0	0
21019	@ironicola Porca vacca, ho rischiato di ammazzarmi. 😂	vacca	0	0
21020	L'anticoagulante di Pfizer diventa una nuova "vacca da mungere" in un contesto di aumento mondiale di problemi di coagulazione del sangue\n\n- Nel 2017 Pfizer ha acquistato Eliquis, un anticoagulante.\n\n- Gli LNP( nanoparticelle lipidiche) delle loro iniezioni causano	vacca	0	0
21021	@LaVeritaWeb @amendolaraf Per non parlare dells scorte ...alle ...escort e a qualche sronzetto afetto da logorrea parlamentare o letteraria...a cani e porci ,tranne che a chi ne ha bisogno . In strada, per la vacca !	vacca	0	0
21022	@pansypfk vacca	vacca	1	1
21023	@Controcorrentv la delegata del M5S dimentica furbescamente \nche il suo capo ha dilapidato 100 miliardi di fondi pubblici per un pugno di voti, illudendo le persone\nche avrebbero potuto mungere l'Italia come una vacca dalle tette\nsmisurate, tette senza fine !!	vacca	0	0
21024	Cosa faceva mentre mi diceva “quella è proprio una sporca, avrà 37 malattie diverse, è brutta, vacca e pure stupida”? \nSe la scopava 😋	vacca	1	1
21025	@applefruit84 @Yle56659193 Olè🎉🎉🎉🎉servono clip per lunedì? Nino già accoppiato alla vacca? Già vedete tutti il circo che monterà a breve? Già leggete i commenti demmerda che compariranno qui a fiotti? Ok torno su Netflix	vacca	1	1
21026	Davvero, porca vacca..... 🤣 https://t.co/0QRkuzaSGu	vacca	0	0
21027	@2ghostshearts Porca vacca anch'io voglio urlare. Ci metterò tutta la nottata a recuperare la festa😭	vacca	0	0
21028	@All_New39rosmad Io ormai sono parcheggiata da Larian ma per colpa della sindrome di Stoccolma mi dispiace vedere andare tutto in vacca	vacca	0	0
21029	Tutti quei bonus cultura andati in vacca per It starts with us	vacca	0	0
21030	@RobiniaSherie L'amore se fa' in due....tu fai la vacca io faccio il bue...	vacca	1	1
21031	@Cinguetterai Ma porca vacca dai anche no	vacca	0	0
21032	@Martii002 PORCA VACCA MARTINA L’INFARTO CHE MI HAI FATTO PRENDERE A METÀ DELLA FRASE https://t.co/OJC7Vj4UfL	vacca	0	0
21033	@UtterMarcus @marmaz se tu sei quello che ha capito, capisco perché l'Italia va in vacca	vacca	0	0
21034	@imalessiawyse Ma porca vacca!!	vacca	0	0
21035	@SicilianoSum ...appena vede una capra o una vacca, non resiste.	vacca	1	1
21036	@imacurvygirl60 Porca vacca ho proprio ragione ha dire che sei una bambola hai un corpo da favola	vacca	0	0
21037	Porca di quella troia vacca impestata. \nAbbiamo perso contro l’Empoli. Questo Empoli. \nI miei figli di una lurida.	vacca	0	0
21038	@ToroGoal A Verona c'era quella grandissima vacca non fatemi parlare	vacca	1	1
21039	@verstappenno @granatiere1906 @Antone2lo_ @Gabgar71 @ZZiliani Perché parli a quella vacca di tua madre?	vacca	1	1
21040	@ZelenskyyUa @vonderleyen Biden e questa vacca del cazzo...\nLi vedi?\nSaranno loro a farti fuori!	vacca	1	1
21041	@SabriPalermoM @CentoxCentoProd @alexmagnicxc @sabrina_monella vacca...	vacca	1	1
21042	@nondiregattose Perché prima fa la vacca in calore poi quando da fuori glielo fanno notare fa la vittima!	vacca	1	1
21043	Mai fidarsi delle apparenze. All’uomo che le urlava:“vacca, vacca!” - venendole incontro col motorino - Lei rispose piccata: “tua madre e tua sorella!”.\nPoco prima che il bovino le sfondasse il parabrezza con le corna…	vacca	1	0
21044	Buon appetito ad i "compagni di merende" PiDioti asservitori e zerbini dell'Europa, Comunità Europea, che "quel che dice l'europa è il ns bene"!!!!😎😁...bene cominciate voi peori!!!😁...condite il tutto con lo sterco essiccato di vacca!!!...sarà molto proteico!!!!😁 https://t.co/5QbdZPB6xn	vacca	0	0
21045	@salvatoreniggez Ma basta vacca miseria	vacca	0	0
21046	6 vacca,,\n#4FRebeliónContraElImperio	vacca	1	1
21047	Questa non è idiota come sembra ha capito che vacca mungere. Sta preparando il terreno per Sanremo. Doveva far parlare di se e oggi lo si fa solo provocando. Che periodo miserabile. https://t.co/tDQHos6CfQ	vacca	0	0
21048	@Valeria80932179 @notfunnycri Cioè lui minaccia la famiglia e poi si fanno le foto insieme tutti sorridenti? E proprio prima di entrare lei gli dice ti amo? Ragazzi ma vi rendete conto di quello che dite o cosa? Delle parole che usate bah stalker violento che minaccia ma porca vacca lavatevi la bocca	vacca	0	0
21049	@ravel80262268 La vacca cotonata è insopportabile.	vacca	1	1
21050	@203ceb71dfa14eb @mariolavia Non è che buttandola in vacca, come siete soliti fare, lo schifo che dimostrate diventi meno puzzolente	vacca	0	0
28001	La sigla de La Zingara quando Cloris Brosca tira fuori la Luna Nera https://t.co/7LpXSvZRkd	zingara	0	0
28002	Francesco De Gregori - Prendi questa mano, zingara (Still/Pseudo Video L... https://t.co/FBGLLpSonG via @YouTube	zingara	0	0
28003	@Dive4JU Meglio consultare la zingara di rai1	zingara	0	0
28004	@ste211221 Ormai sono andata in "fissa"...mio marito " Zingara", mia figlia "Grande Amore" 😍😊	zingara	0	0
28005	@Zingara98446058 @PagellaPolitica E ora hai detto che io ho detto che tu hai detto... Mi vuoi dare sta mano e la facciamo finita, zingara? (ma com'è che hai scelto sto nome? come sei vestita?)	zingara	1	1
28006	Una volta una zingara mi ha sputato su una scarpa. Zozzona 😑	zingara	1	1
28007	appena esco vado dalla zingara che staziona sempre qui davanti e mi faccio leggere la mano perché c'è qualcosa che mi sfugge se a quest'ora sono ancora in ufficio	zingara	1	0
28008	potete pure evitare di mettere le scene con Filippo e la zingara che tanto le skippo	zingara	1	1
28009	@dlibyh_falling Solo lui ha questo potere io sembrerei una zingara HAHAHA	zingara	1	0
28010	@Ninaloca98 @pierlavendetta vergognati sei una zingara	zingara	1	1
28011	@okuncazzo_ Vergognati per la bestemmia, deficente zingara	zingara	1	1
28012	filippo è veramente una delusione pensa solo ai cazzi suoi con quella zingara che non sopporto (che lo ha trattato pure di merda)	zingara	1	1
28013	Questa zingara di merda juventina se parla ancora del Napoli vi giuro faccio una cazzo di strage dell’altro mondo, stai zitta, non capisci un cazzo	zingara	1	1
28014	@RoRoi92375042 La Zingara... Possa lá luce illumunare tuo cuore. Possa il sole non bruciare i tuo piedi. Bongiorno. 🙏🏻❤	zingara	0	0
28015	@Reverie_et_ @87miste È da quando sono piccola che sento questa storiella della bambina rapita dalla zingara ….!	zingara	0	0
28016	Sogni strani stanotte tra cui: ero ad una manifestazione canora, c’erano anche molti di voi, uno mi avvisa che nel pubblico ci sono delle persone in particolare e di restare calmo ed io cambio la mia canzone in Zingara e faccio delle pazzie sul palco perché “la dedico” ecco ☠️💀	zingara	0	0
28017	@graceirwind vecchia zingara	zingara	1	1
28018	@tornamuldur io non ho i capelli cotonati di naditza, però fiera di dimostrare d'essere zingara	zingara	0	0
28019	@sonozingara odio il chiattillo e la zingara non ce la faccio tere	zingara	1	0
28020	dalla bocca di massicaiazzo è uscito ZINGARA\nio. https://t.co/cxc77YtyYN	zingara	0	0
28021	Secondo me, il mese di febbraio ci darà tante soddisfazioni.\nOriana inizierà a non reggere la finzione di essere una bella persona e sclererà in tutta la sua cafonaggine.\nHa iniziato ieri sera dando della zingara a Giaiele e quest'ultima l'ha ripresa per questo.\n#gfvip #nikiters	zingara	0	0
28022	@NottiInBrividi ma che poi una ‘zingara’ prima la potrei anche accettare, ma occidentali’s karma proprio no dai, è carina ma è una canzonetta	zingara	0	0
28023	ma come votate??\noccidentali’s karma prima e soldi ultima? \n(e da fan di mahmood ho votato comunque zingara della zanicchi) https://t.co/mbj6I33tRj	zingara	0	0
28024	non ho ancora visto Mare fuori 3, ma se vedo anche una sola scena pietosa cringe del Chiattillo con la zingara io smetto di pagare il canone	zingara	1	0
28025	Naditza che legge la mano a Carmine e li dice che sta n'guajat, lei è zingara sul serio💀\n#MareFuori3	zingara	0	0
28026	La rosa degli ZINGARA Smugglers aggiornata con gli innesti di #Sirigu, #Pogba e #Hojlund.\n-\nhttps://t.co/wqo4TrvRAi	zingara	0	0
28027	tranquilla che non ci torno in classe oi zingara	zingara	1	1
28028	@BarbagianStein "Non ci vuole la zingara" per capire, ci sono andati si o no a parlare col mafioso?	zingara	0	0
28029	Avete sentito le ha detto “gipsy gipsy” è razzismo dare della zingara! Squalifica!! #nikiters #nikella #gfivip #gintonic https://t.co/x1AK5oVxJ4	zingara	0	0
28030	Zingara a Giaele e Scema a Micol! Ma è Reina può tutto! #nikiters #nikella #nikivip #iostoconnikita #dakita #fuorionestini #fuorioriana	zingara	0	0
28031	@Selene64006414 ma infatti no però dicono che l’hanno scorso uno che ha detto zingara a un’altra é stato squalificato e mi stavo preoccupando	zingara	0	0
28032	Persino la sua cara amica Oriana ha detto a Giaele che si veste male che sembra una gipsy cioè zingara (che tra l'altro se l'avesse detto Antonella apriti cielo), quindi fai un po' te cosa è meglio 🤭😏\n#GFVIP #gintonic #DONNALISI #nikiters #Dakita	zingara	1	0
28033	Una cosa che mi tormenta è la faccia della zingara quando gli legge la mano, ok che sta inguaiato però perché fa quella faccia brutta? Penso solo al fatto che morirà per amore. #MareFuori3	zingara	0	0
28034	Ecco la versione “hot” di “Zingara” di Iva Zanicchi , cantata da Bobby Solo 😅🤣 Questo e molto altro nei “FRIX” segnalati da voi! @ivazanicchi \n\n#striscialanotizia #domenicain\n\nhttps://t.co/TAgLqDmfAY	zingara	0	0
28035	@VincenzoTornab3 Il manicomio ti aspetta, zingara maledetta da Dio	zingara	1	1
28036	@Erica55902833 @MileUnadura Pennette alla puttanesca, culatello,filetti di passera, pasta alla zingara,ditalini in brodo,zizzona di Battipaglia,......	zingara	0	0
28037	@tornamuldur no x carità, però sono zingara, l'ho tramandato a te	zingara	0	0
28038	@jacqueszn_ @elviroclose Mi sa zingara anche lei	zingara	0	0
28039	La noia di chiattillo e la zingara	zingara	0	0
28040	@Agato_Agato @ImolaOggi "Zingara" fu già criticata qualche anno fa.🙈 non da Facebook, di questo passo, si potranno "scrivere" solo righe vuote	zingara	0	0
28041	@mattiafonzi Certo mica era una zingara che ruba in metro o un seconda generazione di qualche gang	zingara	1	0
28042	@ultimora_pol Anche la zingara si mette a rompere I coglioni	zingara	1	0
28043	#alcolriana\nGipsy tradotto : Zingara !! Oriella lo dice a Giaele ! https://t.co/zDGMhfiuYN	zingara	0	0
28044	@valfurla In via Padova ???? Incorporato nel prezzo c’è anche il domenicano con il machete, il marocchino con la marja, la zingara manoveloce ed il gambiano manomorta	zingara	1	0
28045	@ImolaOggi Adesso sotto con il Negroni, poi zingara di Iva Zanicchi e infine la donna cannone di De Gregori per bodyshaming.	zingara	0	0
28046	@HuffPostItalia Non ci voleva la palla di cristallo della zingara ….	zingara	0	0
28047	Avevo basse aspettative eppure questi primi sei episodi PAZZESCHI che superano già di gran lunga tutta la seconda stagione bravo gatto silvestro bravi tutti. Unica cosa che veramente mi ha rotto le palle sono il chiattillo e la zingara VI PREGO BASTA NON SE NE PUÒ PIÙ	zingara	0	0
28048	Che poi la #cibese #trpjan #hunzikerramzza con la #crineriadaleone e fli #occhualicinesi da #zingara si riubusce con il #cinese #fanatico #pasticceriaeros x diventare #nonni nin anfora della #rrojan #auroracinese cin j #piunini di #michelin del #boss #corvaea ma vadfsnculo	zingara	1	1
28049	Canto alla luna, Alda Merini\n\n…\nIo sono nata zingara, non ho posto fisso nel mondo,\nma forse al chiaro di luna\nmi fermerò il tuo momento,\nquanto basti per darti\nun unico bacio d'amore. https://t.co/mVSVY084Z5	zingara	0	0
28050	@Maurobelga Non offendere la zingara	zingara	0	0
